# Supplementary material for: An atomic surface site interaction point description of non-covalent interactions
Source: Royal Society of Chemistry journal article supplement (doi:10.1039/d3sc05690b), 2023-12-08
Supplement: d3sc05690b1.pdf [file d3sc05690b1.pdf]

# An Atomic Surface Site Interaction Point Description of Non-Covalent Interactions

Maria Chiara Storer, Katarzyna J. Zator, Derek P. Reynolds, Christopher A. Hunter\*

*Yusuf Hamied Department of Chemistry, University of Cambridge, CB2 1EW, U.K  
Email: herchelsmith.orgchem@ch.cam.ac.uk*

## Contents

|          |                                                                          |           |
|----------|--------------------------------------------------------------------------|-----------|
| <b>1</b> | <b>Analysis of <math>\alpha</math> and <math>\beta</math> Parameters</b> | <b>2</b>  |
| 1.1      | $\sigma$ -Hole Data . . . . .                                            | 2         |
| 1.2      | I <sub>2</sub> Complexes . . . . .                                       | 9         |
| 1.3      | Statistical Correction of $\beta$ Parameters . . . . .                   | 10        |
| 1.4      | Halogen $\beta$ parameters. . . . .                                      | 12        |
| 1.5      | Calculation of MEPS . . . . .                                            | 13        |
| 1.6      | Relationship between $\beta$ and $E_{min}$ . . . . .                     | 14        |
| 1.7      | Linear Regression with Constant Slope and Variable Intercept . . . . .   | 19        |
| <b>2</b> | <b>Assignment of Atomic Surface Site Interaction Points</b>              | <b>19</b> |
| 2.1      | Atom Types . . . . .                                                     | 19        |
| 2.2      | Atomic Surface Areas . . . . .                                           | 20        |
| 2.3      | Lone Pair AIP Locations . . . . .                                        | 21        |
| 2.4      | Fluorine AIP Locations . . . . .                                         | 21        |
| 2.5      | Hydrogen AIP Locations . . . . .                                         | 22        |
| 2.6      | $\sigma$ -Hole AIP Locations . . . . .                                   | 22        |
| 2.7      | Non-polar AIP Locations . . . . .                                        | 23        |
| <b>3</b> | <b>Free Energy of Transfer</b>                                           | <b>24</b> |
| 3.1      | Data . . . . .                                                           | 24        |
| 3.2      | Free Energy of Transfer and the Number of Alkyl Hydrogens . . . . .      | 72        |
| 3.3      | $f$ value for Various Atom Types . . . . .                               | 75        |
| <b>4</b> | <b>Host-guest complexes AIP pairings</b>                                 | <b>75</b> |
| 4.1      | Tables of host-guest interactions . . . . .                              | 75        |

# 1 Analysis of $\alpha$ and $\beta$ Parameters

## 1.1 $\sigma$ -Hole Data

| Donor          | Acceptor                        | Solvent          | $\log K/M^{-1}b$ |   | Ref. |
|----------------|---------------------------------|------------------|------------------|---|------|
| I-Cl           | Pyridine N-oxide                | CCl <sub>4</sub> | 4.6              | 1 | (1)  |
| I-Cl           | Diphenyl sulfoxide              | CCl <sub>4</sub> | 2.61             | 1 | (2)  |
| I-Cl           | Triphenylphosphine oxide        | CCl <sub>4</sub> | 3.48             | 1 | (2)  |
| I-Cl           | 1,3,5-Trioxan                   | CCl <sub>4</sub> | 0.38             | 1 | (3)  |
| I-Cl           | Trimethyl orthoformate          | CCl <sub>4</sub> | 1.06             | 1 | (3)  |
| I-Cl           | Di-n-Butyl ether                | CCl <sub>4</sub> | 1.12             | 1 | (3)  |
| I-Cl           | 1,4-Dioxan                      | CCl <sub>4</sub> | 1.44             | 1 | (3)  |
| I-Cl           | 1,2-Dimethoxyethane             | CCl <sub>4</sub> | 1.46             | 1 | (3)  |
| I-Cl           | 15-Crown-5                      | CCl <sub>4</sub> | 2.03             | 1 | (3)  |
| I-Cl           | Tetrahydrofuran                 | CCl <sub>4</sub> | 1.86             | 1 | (3)  |
| I-Cl           | Diphenyl ether                  | CCl <sub>4</sub> | -0.04            | 1 | (3)  |
| I-Cl           | anisole                         | CCl <sub>4</sub> | 0.28             | 1 | (3)  |
| I-Cl           | Dibenzyl ether                  | CCl <sub>4</sub> | 0.88             | 1 | (3)  |
| I-Cl           | N,N-Dimethylformamide           | CCl <sub>4</sub> | 2.73             | 1 | (4)  |
| I-Cl           | N,N-Dimethylacetamide           | CCl <sub>4</sub> | 3.23             | 1 | (4)  |
| I-Cl           | Tetramethylurea                 | CCl <sub>4</sub> | 3.22             | 1 | (4)  |
| I-Cl           | N,N,2,2-Tetramethylpropionamide | CCl <sub>4</sub> | 2.58             | 1 | (4)  |
| I-Cl           | Methyl acetate                  | CCl <sub>4</sub> | 0.86             | 1 | (4)  |
| I-Cl           | Acetone                         | CCl <sub>4</sub> | 1.25             | 1 | (4)  |
| I-Cl           | Ethyl methyl ketone             | CCl <sub>4</sub> | 1.23             | 1 | (4)  |
| I-Cl           | Ethyl formate                   | CCl <sub>4</sub> | 0.23             | 1 | (4)  |
| I-Cl           | Acetaldehyde                    | CCl <sub>4</sub> | 0.52             | 1 | (4)  |
| I-Cl           | N,N-Dimethylbenzamide           | CCl <sub>4</sub> | 2.76             | 1 | (4)  |
| I-Cl           | Cyclobutanone                   | CCl <sub>4</sub> | 1.12             | 1 | (5)  |
| I-Cl           | Cyclopentanone                  | CCl <sub>4</sub> | 1.54             | 1 | (5)  |
| I-Cl           | Cyclohexanone                   | CCl <sub>4</sub> | 1.64             | 1 | (5)  |
| I-Cl           | Cycloheptanone                  | CCl <sub>4</sub> | 1.74             | 1 | (5)  |
| I-Cl           | e-caprolactone                  | CCl <sub>4</sub> | 1.62             | 1 | (5)  |
| I-Cl           | Ethyl butanoate                 | CCl <sub>4</sub> | 0.96             | 1 | (6)  |
| I-Cl           | Pyrrolidin-2-one                | CCl <sub>4</sub> | 2.48             | 1 | (6)  |
| I-Cl           | N-methylpyrrolidone             | CCl <sub>4</sub> | 2.78             | 1 | (6)  |
| I-Cl           | N-Methyl-e-Caprolactam          | CCl <sub>4</sub> | 2.91             | 1 | (6)  |
| I-Cl           | N,N-Diethylacetamide            | CCl <sub>4</sub> | 3.1              | 1 | (6)  |
| I-CN           | Benzophenone                    | CCl <sub>4</sub> | 0.53             | 1 | (7)  |
| I-CN           | Diphenyl sulfoxide              | CCl <sub>4</sub> | 1.6              | 1 | (7)  |
| I-CN           | Diethyl ether                   | CCl <sub>4</sub> | 0.61             | 1 | (7)  |
| I-CN           | Tetrahydrofuran                 | CCl <sub>4</sub> | 1.15             | 1 | (7)  |
| I-CN           | Dimethyl sulfoxide              | CCl <sub>4</sub> | 1.97             | 1 | (8)  |
| I-CN           | Tetramethylene sulfoxide        | CCl <sub>4</sub> | 1.99             | 1 | (8)  |
| I <sub>2</sub> | t-Butyl methyl ether            | cyclohexane      | 0.07             | 2 | (2)  |
| I <sub>2</sub> | Diethyl ether                   | cyclohexane      | -0.05            | 2 | (2)  |
| I <sub>2</sub> | Ethyl n-propyl ether            | cyclohexane      | -0.11            | 2 | (2)  |
| I <sub>2</sub> | t-Butyl ethyl ether             | cyclohexane      | -0.27            | 2 | (2)  |
| I <sub>2</sub> | Di-n-propyl ether               | cyclohexane      | -0.16            | 2 | (2)  |

|                |                               |                  |       |   |     |
|----------------|-------------------------------|------------------|-------|---|-----|
| I <sub>2</sub> | Di-n-butyl ether              | heptane          | -0.16 | 2 | (2) |
| I <sub>2</sub> | Di-i-propyl ether             | cyclohexane      | -0.21 | 2 | (2) |
| I <sub>2</sub> | Dimethoxymethane              | CCl <sub>4</sub> | -0.33 | 2 | (2) |
| I <sub>2</sub> | 1,2-Dimethoxyethane           | CCl <sub>4</sub> | -0.14 | 2 | (2) |
| I <sub>2</sub> | 1,1,1-Trimethoxymethane       | CCl <sub>4</sub> | -0.64 | 2 | (2) |
| I <sub>2</sub> | Propylene oxide               | heptane          | -0.03 | 2 | (2) |
| I <sub>2</sub> | Oxetane                       | heptane          | 0.59  | 2 | (2) |
| I <sub>2</sub> | Tetrahydrofuran               | heptane          | 0.4   | 2 | (2) |
| I <sub>2</sub> | Tetrahydropyran               | heptane          | 0.4   | 2 | (2) |
| I <sub>2</sub> | 1,3-Dioxan                    | CCl <sub>4</sub> | -0.28 | 2 | (2) |
| I <sub>2</sub> | 1,4-Dioxan                    | cyclohexane      | -0.11 | 2 | (2) |
| I <sub>2</sub> | 1,3,5-Trioxan                 | CCl <sub>4</sub> | -0.81 | 2 | (2) |
| I <sub>2</sub> | 2-Methyltetrahydrofuran       | heptane          | 0.47  | 2 | (2) |
| I <sub>2</sub> | 12-Crown-4                    | CCl <sub>4</sub> | -0.04 | 2 | (2) |
| I <sub>2</sub> | 15-Crown-5                    | CCl <sub>4</sub> | -0.18 | 2 | (2) |
| I <sub>2</sub> | Acetaldehyde                  | heptane          | -0.36 | 2 | (2) |
| I <sub>2</sub> | Benzaldehyde                  | heptane          | -0.28 | 2 | (2) |
| I <sub>2</sub> | Ethyl trifluoroacetate        | heptane          | -1    | 2 | (2) |
| I <sub>2</sub> | Ethyl trichloroacetate        | heptane          | -0.62 | 2 | (2) |
| I <sub>2</sub> | Methyl formate                | heptane          | -0.36 | 2 | (2) |
| I <sub>2</sub> | Ethyl formate                 | heptane          | -0.31 | 2 | (2) |
| I <sub>2</sub> | Dimethyl carbonate            | heptane          | -0.25 | 2 | (2) |
| I <sub>2</sub> | Methyl benzoate               | heptane          | -0.21 | 2 | (2) |
| I <sub>2</sub> | Diethyl carbonate             | heptane          | -0.21 | 2 | (2) |
| I <sub>2</sub> | Ethyl Methyl carbonate        | heptane          | -0.21 | 2 | (2) |
| I <sub>2</sub> | Ethyl pivalate                | heptane          | -0.17 | 2 | (2) |
| I <sub>2</sub> | Ethyl benzoate                | heptane          | -0.15 | 2 | (2) |
| I <sub>2</sub> | Methyl acetate                | heptane          | -0.12 | 2 | (2) |
| I <sub>2</sub> | Ethyl isobutyrate             | heptane          | -0.1  | 2 | (2) |
| I <sub>2</sub> | Ethyl propionate              | heptane          | -0.04 | 2 | (2) |
| I <sub>2</sub> | Ethyl acetate                 | heptane          | -0.03 | 2 | (2) |
| I <sub>2</sub> | Ethyl cyclopropanecarboxylate | heptane          | 0     | 2 | (2) |
| I <sub>2</sub> | Ethyl butanoate               | CCl <sub>4</sub> | 0.04  | 2 | (2) |
| I <sub>2</sub> | ε-Caprolactone                | CCl <sub>4</sub> | 0.22  | 2 | (2) |
| I <sub>2</sub> | 1,1,1-Trichloroacetone        | heptane          | -0.96 | 2 | (2) |
| I <sub>2</sub> | 1,1,1-Trifluoroacetone        | heptane          | -0.6  | 2 | (2) |
| I <sub>2</sub> | 3-Trifluoromethylacetophenone | heptane          | -0.24 | 2 | (2) |
| I <sub>2</sub> | Benzophenone                  | heptane          | -0.07 | 2 | (2) |
| I <sub>2</sub> | 4-Chloroacetophenone          | heptane          | -0.07 | 2 | (2) |
| I <sub>2</sub> | Cyclobutanone                 | heptane          | -0.02 | 2 | (2) |
| I <sub>2</sub> | Diethyl ketone                | heptane          | 0.01  | 2 | (2) |
| I <sub>2</sub> | Ethyl methyl ketone           | heptane          | 0.01  | 2 | (2) |
| I <sub>2</sub> | Isopropyl methyl ketone       | heptane          | 0.03  | 2 | (2) |
| I <sub>2</sub> | Acetone                       | heptane          | 0.05  | 2 | (2) |
| I <sub>2</sub> | Acetophenone                  | heptane          | 0.06  | 2 | (2) |
| I <sub>2</sub> | 3-Methoxyacetophenone         | heptane          | 0.14  | 2 | (2) |
| I <sub>2</sub> | 3-Methylacetophenone          | heptane          | 0.11  | 2 | (2) |
| I <sub>2</sub> | 4-Methylacetophenone          | heptane          | 0.16  | 2 | (2) |
| I <sub>2</sub> | Cyclopentanone                | heptane          | 0.23  | 2 | (2) |
| I <sub>2</sub> | 4-Methoxyacetophenone         | heptane          | 0.29  | 2 | (2) |

|                |                                    |                  |       |   |     |
|----------------|------------------------------------|------------------|-------|---|-----|
| I <sub>2</sub> | Cycloheptanone                     | CCl <sub>4</sub> | 0.39  | 2 | (2) |
| I <sub>2</sub> | Cyclohexanone                      | CCl <sub>4</sub> | 0.4   | 2 | (2) |
| I <sub>2</sub> | Dimethylcarbamoyl chloride         | heptane          | -0.41 | 2 | (2) |
| I <sub>2</sub> | N,N-dimethyltrichloroacetamide     | heptane          | -0.35 | 2 | (2) |
| I <sub>2</sub> | N,N-dimethyltrifluoroacetamide     | heptane          | -0.21 | 2 | (2) |
| I <sub>2</sub> | N,N-dimethylchloroacetamide        | CCl <sub>4</sub> | 0.34  | 2 | (2) |
| I <sub>2</sub> | 1-(3'-Chlorophenyl)-2-pyrrolidone  | CCl <sub>4</sub> | 0.41  | 2 | (2) |
| I <sub>2</sub> | 1-(4'-Chlorophenyl)-2-pyrrolidone  | CCl <sub>4</sub> | 0.47  | 2 | (2) |
| I <sub>2</sub> | N,N-diisopropylpivalamide          | heptane          | 0.48  | 2 | (2) |
| I <sub>2</sub> | 1-Phenyl-2-pyrrolidone             | CCl <sub>4</sub> | 0.64  | 2 | (2) |
| I <sub>2</sub> | 1-(3'-Methoxyphenyl)-2-pyrrolidone | CCl <sub>4</sub> | 0.64  | 2 | (2) |
| I <sub>2</sub> | 1-(4'-Ethylphenyl)-2-pyrrolidone   | CCl <sub>4</sub> | 0.7   | 2 | (2) |
| I <sub>2</sub> | 1-(4'-Methylphenyl)-2-pyrrolidone  | CCl <sub>4</sub> | 0.73  | 2 | (2) |
| I <sub>2</sub> | 1-(2'-Chlorophenyl)-2-pyrrolidone  | CCl <sub>4</sub> | 0.73  | 2 | (2) |
| I <sub>2</sub> | 1-(4'-Methoxyphenyl)-2-pyrrolidone | CCl <sub>4</sub> | 0.78  | 2 | (2) |
| I <sub>2</sub> | N,N-dimethylformamide              | heptane          | 0.81  | 2 | (2) |
| I <sub>2</sub> | N,N-dimethylpivalamide             | heptane          | 0.83  | 2 | (2) |
| I <sub>2</sub> | N,N-dimethylbenzamide              | heptane          | 0.91  | 2 | (2) |
| I <sub>2</sub> | N,N-dimethylacetamide              | heptane          | 1.18  | 2 | (2) |
| I <sub>2</sub> | Pyrrolidin-2-one                   | CCl <sub>4</sub> | 1.2   | 2 | (2) |
| I <sub>2</sub> | N,N-diethylacetamide               | heptane          | 1.27  | 2 | (2) |
| I <sub>2</sub> | N-methylpyrrolidone                | heptane          | 1.3   | 2 | (2) |
| I <sub>2</sub> | N-methyl-ε-caprolactam             | heptane          | 1.35  | 2 | (2) |
| I <sub>2</sub> | N-methylpiperidone                 | heptane          | 1.47  | 2 | (2) |
| I <sub>2</sub> | Tetraethylurea                     | heptane          | 1.04  | 2 | (2) |
| I <sub>2</sub> | Tetramethylurea                    | heptane          | 1.16  | 2 | (2) |
| I <sub>2</sub> | Di-n-butyl sulfoxide               | cyclohexane      | 1.93  | 2 | (2) |
| I <sub>2</sub> | Tetramethylene sulfoxide           | CCl <sub>4</sub> | 1.72  | 2 | (2) |
| I <sub>2</sub> | Dimethyl sulfoxide                 | cyclohexane      | 1.56  | 2 | (2) |
| I <sub>2</sub> | Diphenyl sulfoxide                 | CCl <sub>4</sub> | 1.1   | 2 | (2) |
| I <sub>2</sub> | Sulfolane                          | CCl <sub>4</sub> | -0.12 | 2 | (2) |
| I <sub>2</sub> | Diethyl sulfite                    | CCl <sub>4</sub> | -0.16 | 2 | (2) |
| I <sub>2</sub> | Trimethylphosphine oxide           | CCl <sub>4</sub> | 2.72  | 2 | (2) |
| I <sub>2</sub> | Triethylphosphine oxide            | CCl <sub>4</sub> | 2.76  | 2 | (2) |
| I <sub>2</sub> | Tri-n-butylphosphine oxide         | cyclohexane      | 2.75  | 2 | (2) |
| I <sub>2</sub> | Tri-n-octylphosphine oxide         | cyclohexane      | 2.77  | 2 | (2) |
| I <sub>2</sub> | Hexamethylphosphoric acid triamide | CCl <sub>4</sub> | 2.55  | 2 | (2) |
| I <sub>2</sub> | Triphenylphosphine oxide           | CCl <sub>4</sub> | 2.08  | 2 | (2) |
| I <sub>2</sub> | Ethyl tetraethylphosphorodiamidate | CCl <sub>4</sub> | 1.93  | 2 | (2) |

|                                                                  |                                   |                  |       |   |      |
|------------------------------------------------------------------|-----------------------------------|------------------|-------|---|------|
| I <sub>2</sub>                                                   | Diethyl methylphosphonate         | cyclohexane      | 1.57  | 2 | (2)  |
| I <sub>2</sub>                                                   | Tri-n-butyl phosphate             | cyclohexane      | 1.33  | 2 | (2)  |
| I <sub>2</sub>                                                   | Diethyl chloromethylphosphonate   | CCl <sub>4</sub> | 0.87  | 2 | (2)  |
| I <sub>2</sub>                                                   | Diethyl dichloromethylphosphonate | CCl <sub>4</sub> | 0.51  | 2 | (2)  |
| I <sub>2</sub>                                                   | Pyridine N-oxide                  | cyclohexane      | 2.4   | 2 | (2)  |
| CCl <sub>4</sub>                                                 | Tetrahydrofuran                   | cyclohexane      | -1.1  | 4 | (9)  |
| CCl <sub>4</sub>                                                 | Tetrahydropyran                   | cyclohexane      | -0.89 | 4 | (9)  |
| CCl <sub>4</sub>                                                 | Di-n-Butyl ether                  | cyclohexane      | -1.4  | 4 | (2)  |
| CCl <sub>4</sub>                                                 | N,N-Dimethylacetamide             | cyclohexane      | -0.44 | 4 | (10) |
| CCl <sub>4</sub>                                                 | N-Methylpyrrolidone               | cyclohexane      | -0.39 | 4 | (10) |
| CBr <sub>4</sub>                                                 | Tetrahydrofuran                   | heptane          | -0.34 | 4 | (9)  |
| CBr <sub>4</sub>                                                 | Tetrahydropyran                   | heptane          | -0.03 | 4 | (9)  |
| Cl <sub>2</sub> C=CCl <sub>2</sub>                               | Tetrahydrofuran                   | cyclohexane      | -0.82 | 4 | (9)  |
| Cl <sub>2</sub> C=CCl <sub>2</sub>                               | Tetrahydropyran                   | cyclohexane      | -1.22 | 4 | (9)  |
| IC <sub>6</sub> F <sub>5</sub>                                   | Di-n-Butyl sulfoxide              | cyclohexane      | 0.3   | 1 | (11) |
| IC <sub>6</sub> F <sub>5</sub>                                   | Tri-n-Butylphosphine oxide        | cyclohexane      | 1.08  | 1 | (11) |
| p-C#CPh -IC <sub>6</sub> F <sub>4</sub>                          | tri n-butyl phosphine oxide       | cyclohexane      | 0.75  | 4 | (11) |
| p-Ph -IC <sub>6</sub> F <sub>4</sub>                             | tri n-butyl phosphine oxide       | cyclohexane      | 0.59  | 4 | (11) |
| p-OCH <sub>3</sub> -IC <sub>6</sub> F <sub>4</sub>               | tri n-butyl phosphine oxide       | cyclohexane      | 0.52  | 4 | (11) |
| N(CH <sub>2</sub> ) <sub>5</sub> -IC <sub>6</sub> F <sub>4</sub> | tri n-butyl phosphine oxide       | cyclohexane      | 0.11  | 4 | (11) |
| I-C≡C-C≡N                                                        | N,N-Diethylacetamide              | CCl <sub>4</sub> | 1.7   | 1 | (12) |
| I-C≡C-C≡N                                                        | triphenylphosphine oxide          | CCl <sub>4</sub> | 2.34  | 1 | (12) |
| I-C≡C-Ph                                                         | N,N-Diethylacetamide              | CCl <sub>4</sub> | 0.2   | 1 | (12) |
| I-C≡C-Ph                                                         | Triphenylphosphine oxide          | benzene          | 0.39  | 1 | (12) |
| I-C≡C-Ph                                                         | Hexamethylphosphoric amide        | tri- benzene     | 0.78  | 1 | (12) |
| I-C≡C-COOEt                                                      | triphenylphosphine oxide          | benzene          | 1.04  | 1 | (12) |
| I-C≡C-I                                                          | triphenylphosphine oxide          | benzene          | 0.19  | 1 | (12) |
| I-C≡C-I                                                          | Hexamethylphosphoric amide        | tri- benzene     | 0.72  | 1 | (12) |
| I-(CF <sub>2</sub> ) <sub>5</sub> CF <sub>3</sub>                | Tri-n-Butylphosphine oxide        | CCl <sub>4</sub> | 0.6   | 1 | (11) |
| I-(CF <sub>2</sub> ) <sub>5</sub> CF <sub>3</sub>                | Tri-n-Butylphosphine oxide        | benzene          | 0.7   | 1 | (11) |

Table S1 log  $K$  data for complexation of  $\sigma$ -holes with oxygen acceptors in non-polar solvents ( $\sigma$  indicates the number of degenerate interaction sites).

| Solvent          | $\alpha_S$ | $\beta_S$ |
|------------------|------------|-----------|
| benzene          | 1.1        | 1.6       |
| CCl <sub>4</sub> | 1.4        | 0.6       |
| heptane          | 1.2        | 0.6       |
| cyclohexane      | 1.2        | 0.6       |

Table S2  $\alpha_S$  and  $\beta_S$  parameters of the non-polar solvents for the for complexation of  $\sigma$ -holes with oxygen acceptors.

| Acceptor                       | $\beta$ |
|--------------------------------|---------|
| 1,1,1-trifluoroacetone         | 2.9     |
| 1,1,1-trichloroacetone         | 3.1     |
| 1,3,5-trioxan                  | 3.1     |
| diphenyl ether                 | 3.1     |
| ethyl trifluoroacetate         | 3.2     |
| anisole                        | 3.3     |
| ethyl trichloroacetate         | 3.4     |
| 1,1,1-trimethoxymethane        | 4.3     |
| trimethyl orthoformate         | 4.3     |
| dimethoxymethane               | 4.4     |
| acetaldehyde                   | 4.5     |
| ethyl formate                  | 4.5     |
| 1,3-dioxan                     | 4.5     |
| methyl formate                 | 4.5     |
| dibenzyl ether                 | 4.7     |
| 3-trifluoromethylacetophenone  | 4.7     |
| benzaldehyde                   | 4.8     |
| methyl benzoate                | 4.9     |
| ethyl methyl carbonate         | 4.9     |
| diethyl sulfite                | 4.9     |
| dimethyl carbonate             | 4.9     |
| di-n-butyl ether               | 5.0     |
| 1,4-dioxan                     | 5.0     |
| diethyl carbonate              | 5.0     |
| methyl acetate                 | 5.1     |
| 4-chloroacetophenone           | 5.1     |
| ethyl benzoate                 | 5.1     |
| propylene oxide                | 5.2     |
| di-n-propyl ether              | 5.2     |
| ethyl n-propyl ether           | 5.2     |
| dimethylcarbamoyl chloride     | 5.3     |
| diethyl ether                  | 5.3     |
| ethyl acetate                  | 5.3     |
| cyclobutanone                  | 5.3     |
| benzophenone                   | 5.4     |
| di-i-propyl ether              | 5.4     |
| ethyl pivalate                 | 5.4     |
| diethyl ketone                 | 5.4     |
| n,n-dimethyltrifluoroacetamide | 5.4     |
| isopropyl methyl ketone        | 5.5     |
| ethyl propionate               | 5.5     |
| ethyl isobutyrate              | 5.5     |
| ethyl butanoate                | 5.5     |
| 3-methylacetophenone           | 5.5     |
| 1,2-dimethoxyethane            | 5.6     |
| t-butyl methyl ether           | 5.6     |
| 12-crown-4                     | 5.6     |
| ethyl cyclopropanecarboxylate  | 5.6     |

|                                    |     |
|------------------------------------|-----|
| 15-crown-5                         | 5.6 |
| 3-methoxyacetophenone              | 5.6 |
| t-butyl ethyl ether                | 5.6 |
| tetrahydropyran                    | 5.7 |
| acetone                            | 5.7 |
| n,n-dimethyltrichloroacetamide     | 5.7 |
| ethyl methyl ketone                | 5.7 |
| acetophenone                       | 5.7 |
| 4-methylacetophenone               | 5.8 |
| tetrahydrofuran                    | 5.9 |
| cyclopentanone                     | 6.0 |
| 2-methyltetrahydrofuran            | 6.0 |
| 4-methoxyacetophenone              | 6.0 |
| cyclohexanone                      | 6.1 |
| sulfolane                          | 6.2 |
| oxetane                            | 6.2 |
| cycloheptanone                     | 6.2 |
| 1-(3'-chlorophenyl)-2-pyrrolidone  | 6.4 |
| 1-(4'-chlorophenyl)-2-pyrrolidone  | 6.5 |
| e-caprolactone                     | 6.7 |
| n,n-dimethylchloroacetamide        | 6.9 |
| 1-(3'-methoxyphenyl)-2-pyrrolidone | 7.0 |
| 1-phenyl-2-pyrrolidone             | 7.1 |
| 1-(4'-methylphenyl)-2-pyrrolidone  | 7.3 |
| 1-(4'-ethylphenyl)-2-pyrrolidone   | 7.3 |
| diphenyl sulfoxide                 | 7.5 |
| 1-(4'-methoxyphenyl)-2-pyrrolidone | 7.5 |
| n,n-dimethylformamide              | 7.6 |
| n,n-diisopropylpivalamide          | 7.6 |
| n,n,2,2-tetramethylpropionamide    | 7.8 |
| n,n-dimethylpivalamide             | 7.8 |
| diethyl dichloromethylphosphonate  | 7.8 |
| 1-(2'-chlorophenyl)-2-pyrrolidone  | 7.8 |
| n,n-dimethylbenzamide              | 7.8 |
| n,n-diethylacetamide               | 8.2 |
| n,n-dimethylacetamide              | 8.4 |
| n-methylpyrrolidone                | 8.4 |
| tetramethylurea                    | 8.4 |
| diethyl chloromethylphosphonate    | 8.5 |
| tetraethylurea                     | 8.5 |
| tetramethylene sulfoxide           | 8.6 |
| tri-n-butyl phosphate              | 8.6 |
| dimethyl sulfoxide                 | 8.7 |
| n-methyl-e-caprolactam             | 8.7 |
| di-n-butyl sulfoxide               | 8.7 |
| n-methylpiperidone                 | 8.8 |
| pyrrolidin-2-one                   | 8.9 |
| ethyl tetraethylphosphorodiamidate | 9.0 |
| pyridine n-oxide                   | 9.1 |
| diethyl methylphosphonate          | 9.1 |

|                               |      |
|-------------------------------|------|
| triphenylphosphine oxide      | 10.1 |
| tri-n-butylphosphine oxide    | 10.2 |
| triethylphosphine oxide       | 10.6 |
| tri-n-octylphosphine oxide    | 10.7 |
| trimethylphosphine oxide      | 10.7 |
| hexamethylphosphoric triamide | 11.0 |

Table S3  $\beta$  values of the oxygen acceptors involved in the complexation with  $\sigma$ -holes in non-polar solvents.



## 1.2 I<sub>2</sub> Complexes

Figure S1 shows a comparison of the calculated  $\log K$  ( $\log K_{calc}$ ) and the experimental  $\log K$  ( $\log K_{expt}$ ) for the 1:1 complexes of I<sub>2</sub> with different oxygen acceptors. The calculated  $\log K$  is obtained with Equ. 2 with an  $\alpha$  for I<sub>2</sub> = 2.3.

The plot shows that Equ. 2 does not accurately describe the behaviour of complexes involving I<sub>2</sub>, perhaps because the low-lying  $\sigma^*$  orbitals of I<sub>2</sub> give rise to a high degree of covalent character in the interaction even when oxygen acceptors are involved.

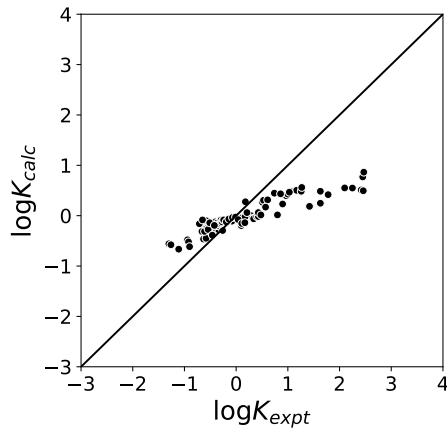

Figure S1 Comparison of the calculated  $\log K$  ( $\log K_{calc}$ ) and the experimental  $\log K$  ( $\log K_{expt}$ ) for the 1:1 complexes of I<sub>2</sub> with different oxygen acceptors. The calculated  $\log K$  is obtained with Equ. 2 with an  $\alpha$  for I<sub>2</sub> = 2.3.

### 1.3 Statistical Correction of $\beta$ Parameters

For some compounds, the experimentally determined value of  $\beta$  was statistically corrected to reflect the number of degenerate H-bond acceptors present. Table S4 lists the molecules for which the value of  $\beta$  differs from that published in ref. (13).

| name                                                                   | original $\beta$ | corrected $\beta$ | Note |
|------------------------------------------------------------------------|------------------|-------------------|------|
| 3-chloronitrobenzene                                                   | 3.4              | 2.7               | b    |
| 4-chloronitrobenzene                                                   | 3.6              | 2.9               | b    |
| bis(2-chloroethyl) ether                                               | 3.7              | 3.0               | a    |
| nitromethane                                                           | 3.7              | 3.0               | b    |
| nitroethane                                                            | 3.8              | 3.1               | b    |
| 4-nitrophenyl acetate                                                  | 3.8              | 3.1               | b    |
| 4-nitrotoluene                                                         | 3.8              | 3.1               | b    |
| 4-nitrobenzaldehyde                                                    | 3.9              | 3.2               | b    |
| nitrobenzene                                                           | 3.9              | 3.2               | b    |
| 2-methyl-2-nitropropane                                                | 4.0              | 3.3               | b    |
| 2-nitropropane                                                         | 4.0              | 3.3               | b    |
| 1,2-dimethyl-4-nitrobenzene                                            | 4.1              | 3.4               | b    |
| 4-nitroanisole                                                         | 4.2              | 3.5               | b    |
| biacetyl                                                               | 4.2              | 3.6               | b    |
| 2-chloroethyl ethyl ether                                              | 4.3              | 4.0               | a    |
| 2-benzyl-1,2-benzothiazol-3(2h)-one 1,1-dioxide                        | 4.6              | 3.9               | a    |
| 1-(4-nitrophenyl)ethanone                                              | 4.6              | 3.9               | b    |
| dibenzyl ether                                                         | 4.7              | 4.5               | a    |
| diethyl sulphate                                                       | 4.8              | 4.1               | a    |
| n,n-diethyl-4-nitroaniline                                             | 5.1              | 4.4               | b    |
| n-benzyl-n-methylbenzenesulfonamide                                    | 5.2              | 4.5               | b    |
| 9,10 phenantrequinone                                                  | 5.3              | 4.6               | b    |
| ethyl methanesulfonate                                                 | 5.3              | 4.6               | b    |
| <i>N,N</i> -dimethylbenzenesulfonamide                                 | 5.8              | 5.1               | b    |
| diphenyl sulphone                                                      | 5.9              | 5.2               | b    |
| <i>N</i> -methylmethanesulfonamide                                     | 5.9              | 5.2               | b    |
| <i>N,N</i> -dimethylmethanesulfonamide                                 | 6.0              | 5.3               | b    |
| tetrahydrothiophene 1,1-dioxide                                        | 6.2              | 5.5               | b    |
| dimethyl sulphone                                                      | 6.2              | 5.5               | b    |
| <i>N,N,N',N'</i> -tetraethylsulfamide                                  | 6.3              | 5.6               | b    |
| dibutyl sulphone                                                       | 6.4              | 5.7               | b    |
| 3-aminopropanenitrile                                                  | 6.1              | 5.9               | c    |
| 2-methyl-5-(methylsulfanyl)-1,3,4-thiadiazole                          | 7.5              | 6.4               | b    |
| 2,5-dimethyl-1,3,4-thiadiazole                                         | 7.2              | 6.8               | b    |
| <i>N</i> -[(4-methylphenyl)sulfonyl]- <i>S,S</i> -diphenyl-sulfilimine | 7.8              | 7.1               | b    |
| 4-butyl-4H-1,2,4-triazole                                              | 8.7              | 8.2               | b    |
| 2,2,2-trimethyl-1-[(4-methylphenyl)sulfonyl]diazan-2-ium-1-ide         | 8.9              | 8.2               | b    |
| 2,2,2-trimethyl-1-(octylsulfonyl)diazan-2-ium-1-ide                    | 9.5              | 8.8               | b    |

Table S4 Corrected  $\beta$  values Note a) competition with other functional groups, but the contribution of just the ether was obtained from IR in ref. (14) b) statistically corrected by RTln2 to take into account two equivalent sites c) competition with other functional groups, but the contribution of just the ether was obtained from IR in ref. (15)

## 1.4 Halogen $\beta$ parameters.

| Compound                 | $\beta$ |
|--------------------------|---------|
| CHLORINE                 |         |
| 1,1,1-trichloroethane    | 0.5     |
| tetrachloromethane       | 0.6     |
| chloroform               | 0.8     |
| dichloromethane          | 1.3     |
| 1,1-dichloroethane       | 1.5     |
| 1,2-dichloroethane       | 1.7     |
| 1,3-dichloropropane      | 1.9     |
| 1,4-dichlorobutane       | 2.0     |
| 1,5-dichloropentane      | 2.2     |
| 1-chlorobutane           | 2.2     |
| 1-chloropentane          | 2.2     |
| 2-chloropropane          | 2.4     |
| 2-chloro-2-methylpropane | 2.4     |
| chlorocyclohexane        | 2.5     |
| 1-chloroadamantane       | 2.7     |
| BROMINE                  |         |
| dibromomethane           | 1.5     |
| 1,2-dibromoethane        | 1.7     |
| 1,3-dibromopropane       | 1.9     |
| bromocyclopropane        | 2.0     |
| 1,4-dibromobutane        | 2.0     |
| 1-bromopropane           | 2.2     |
| bromoethane              | 2.2     |
| 1-bromobutane            | 2.3     |
| 1-bromopentane           | 2.3     |
| 2-bromopropane           | 2.4     |
| bromocyclohexane         | 2.5     |
| 2-bromo-2-methylpropane  | 2.6     |
| 1-bromoadamantane        | 2.7     |
| IODINE                   |         |
| 1,2-diiodoethane         | 1.6     |
| diiodomethane            | 1.6     |
| 1,3-diiodopropane        | 1.9     |
| iodoethane               | 2.0     |
| 1,4-diiodobutane         | 2.0     |
| iodomethane              | 2.0     |
| 1-iodopentane            | 2.2     |
| 2-iodopropane            | 2.2     |
| 2-iodo-2-methylpropane   | 2.3     |
| iodocyclohexane          | 2.4     |
| 1-iodoadamantane         | 2.6     |

Table S5  $\beta$  parameters for halogen acceptors from ref. (16), which have been statistically corrected taking into account the number of acceptor sites.

## 1.5 Calculation of MEPS

MEPS calculations were carried out using NWChem 7.0.2 on a cluster of 8 eight-core nodes (Intel Xeon E5-2650 v2 2.60GHz Ivy Bridge CPUs, 128 GB RAM per node). A standard geometry optimisation was carried out on each molecule using a DRIVER module with up to 600 iterations and a convergence criterion of 1e-08 (B3LYP functional and 6-31G\* basis set, or 6-31G\*\* basis set for bromine and iodine without effective core potentials). The MEPS were then calculated using the espiso function in NWChem with the following parameters:

0.0020 isosurface: padding: 4.0, iso\_surf: 0.002, step\_size: 0.066, tol: 3e-05

0.0104 isosurface: padding: 4.0, iso\_surf: 0.0104, step\_size: 0.04, tol: 1e-4

0.0300 isosurface: padding: 4.0, iso\_surf: 0.0300, step\_size: 0.04, tol: 1e-4

For each structure, seven different rotations were carried out (combinations of 45° and 120° in one plane and 10° and 100° in another), and the MEPS calculations were repeated. The seven rotated MEPS were then superimposed to obtain high resolution MEPS for analysis.

## 1.6 Relationship between $\beta$ and $E_{min}$

Figure S2 shows the relationship of the  $\beta$  and the  $E_{min}$  of the MEP calculated with DFT with the B3LYP/6-31G\* for polar acceptor functional groups involving nitrogen, oxygen, fluorine and  $sp^2$  sulfur.

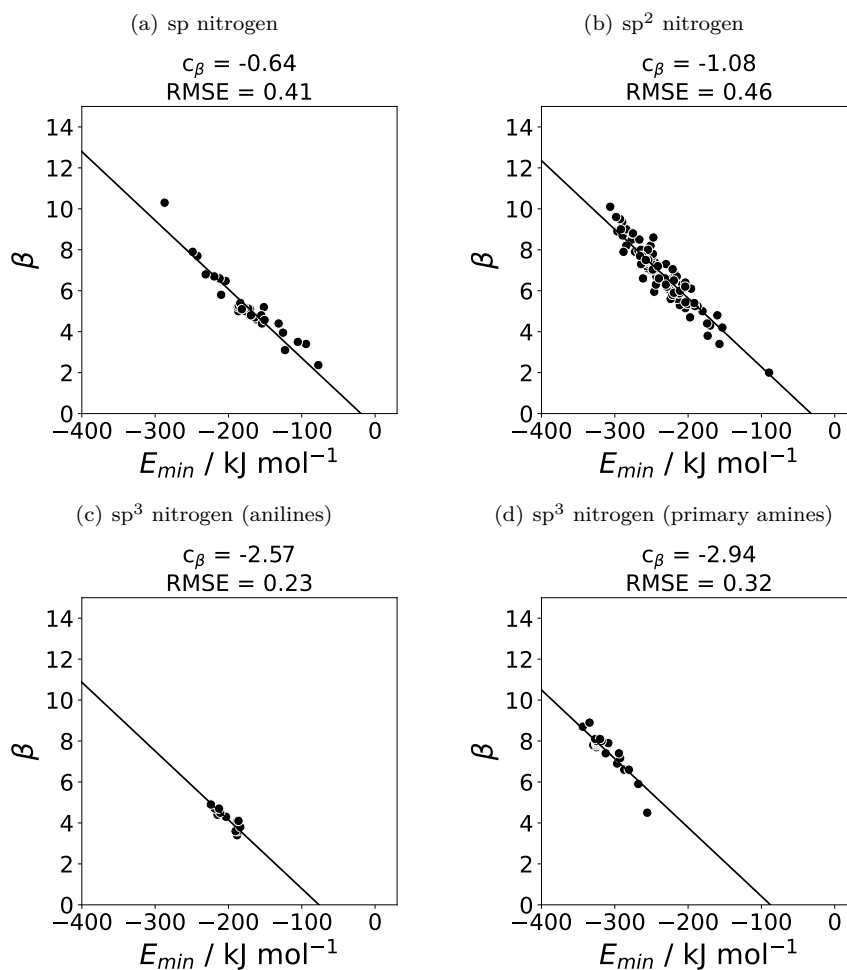

Figure S2 Relationship between  $\beta$  and the  $E_{min}$  of the MEP calculated for polar acceptor functional groups at the  $0.0300 \text{ e bohr}^{-3}$  with DFT, calculated with the B3LYP/6-31G\* (B3LYP/6-311G\*\* for sulfur). The lines are the lines of best fit keeping the slope constant amongst the different functional groups ( $m_\beta = -0.0336 / \text{kJ mol}^{-1}$ ).

(a)  $sp^3$  nitrogen (secondary amines)

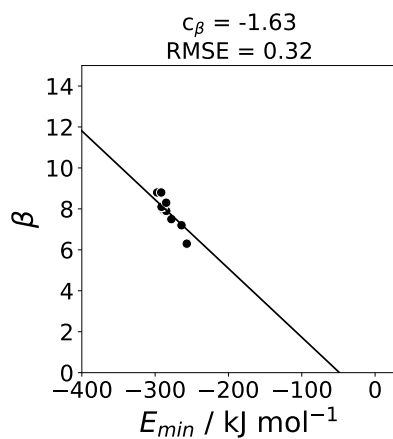

(b)  $sp^3$  nitrogen (tertiary amines)

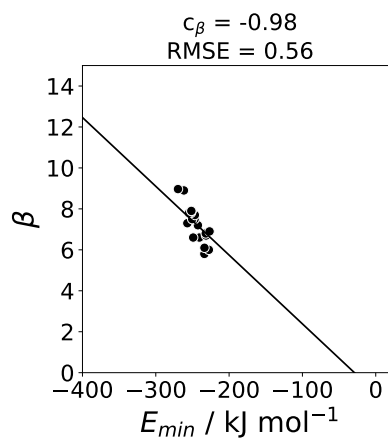

(c)  $sp^2$  oxygen (ketones, esters, aldehydes, carbonates, nitro groups)

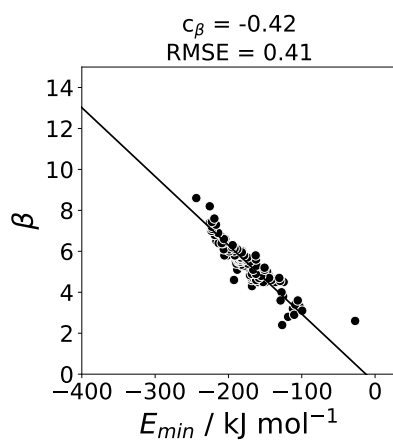

(d)  $sp^2$  oxygen (amides, ureas, vinylogous amides)

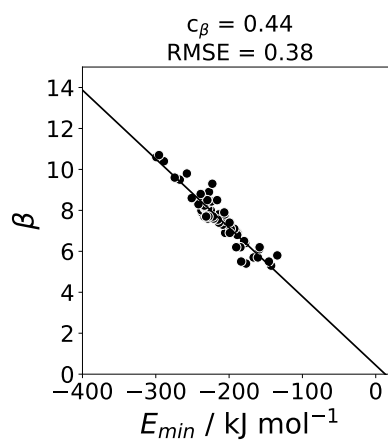

(e)  $sp^2$  oxygen (nitrogen oxides)

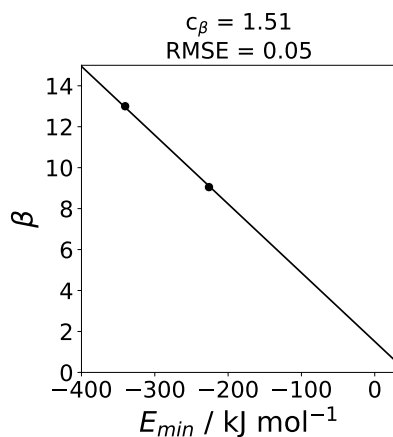

(f)  $sp^2$  oxygen (nitro)

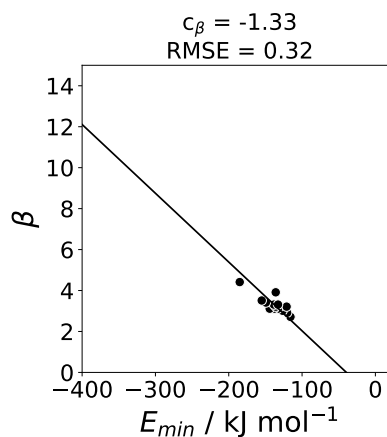

Figure S2 Continued here.

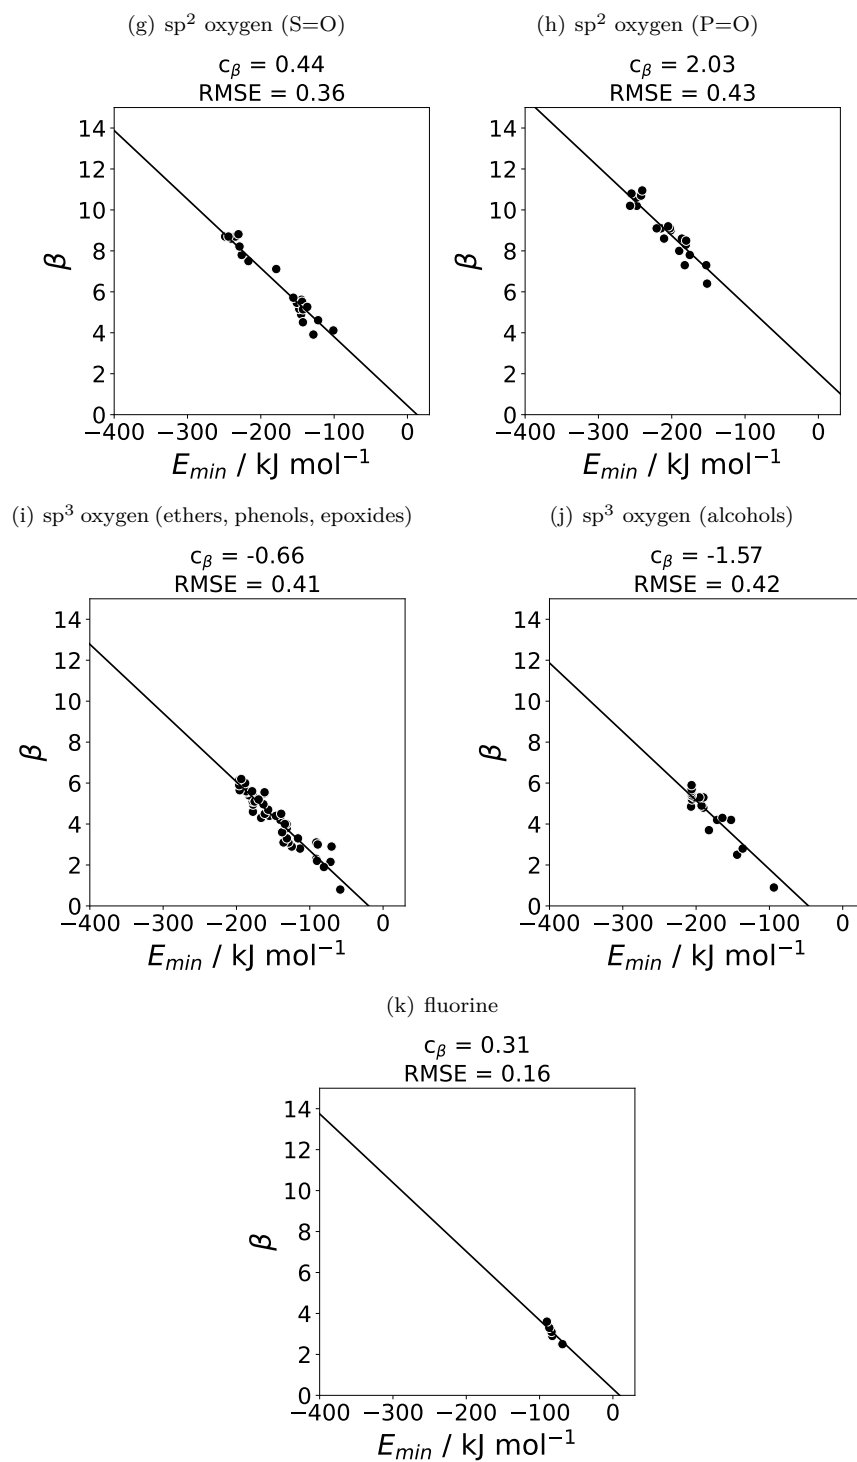

Figure S2 Continued here.



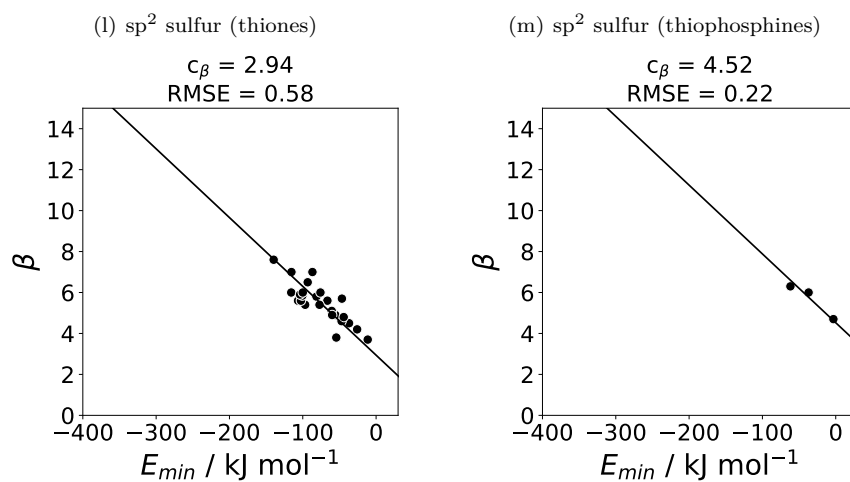

Figure S2 Continued here.

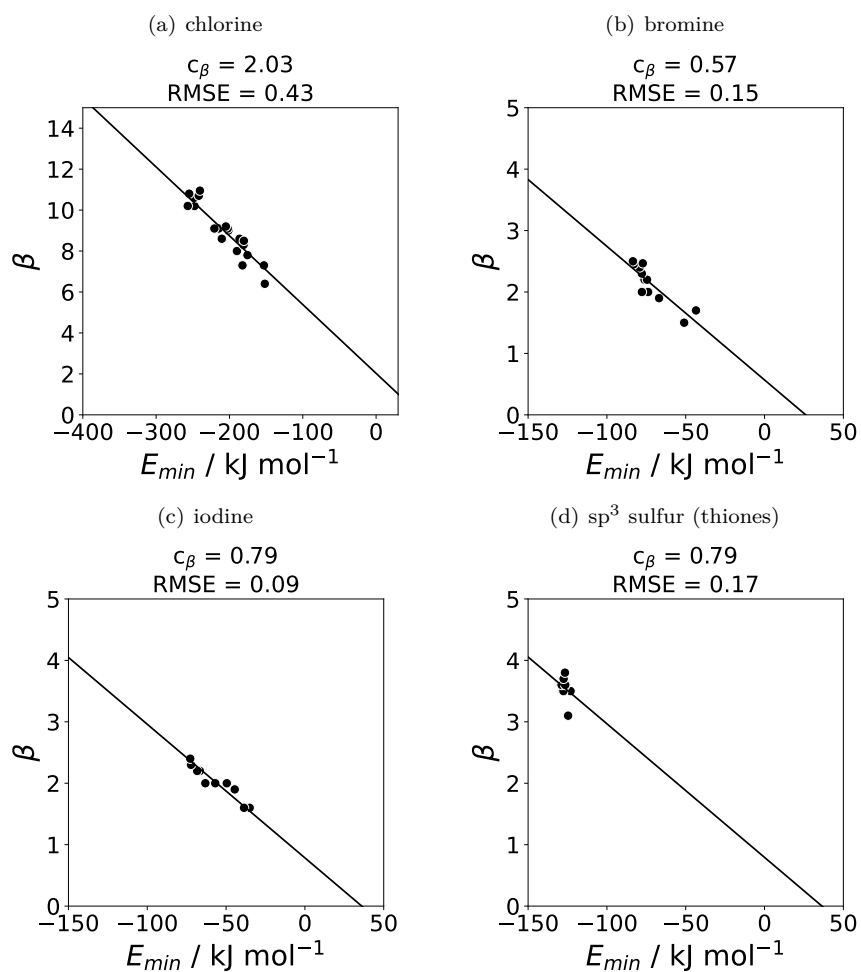

Figure S3 Relationship between the  $\beta$  and  $E_{min}$  of the MEP calculated for non-polar acceptor functional groups at the  $0.0020 \text{ e bohr}^{-3}$  surface with DFT, with the B3LYP/6-31G\* (B3LYP/6-311G\*\* for bromine iodine). The lines are the lines of best fit keeping the slope constant amongst the different functional groups ( $m_\beta = -0.0232 / \text{kJ mol}^{-1}$ ).

## 1.7 Linear Regression with Constant Slope and Variable Intercept

The parameter  $y$  is related to  $x$  by the linear equation shown below.

$$y = mx + c \quad (\text{S1})$$

The error of this equation is:

$$\epsilon = \frac{1}{N} \sum_i^N (y_i - mx_i + c)^2 \quad (\text{S2})$$

We want to find the optimal intercept  $c$  if the slope is known. This will allow us to handle data that have a constant slope but varying intercept. To find the optimal  $c$  we rewrite the equation as

$$\epsilon = \frac{1}{N} \sum_i^N (a_i^2 - 2a_i c + c^2) \quad (\text{S3})$$

Where  $a_i$  is  $y_i - mx_i$ .

We can also write this as:

$$\epsilon = \frac{1}{N} \left( \sum_i^N a_i^2 - 2c \sum_i^N a_i + c^2 \right) \quad (\text{S4})$$

To find the  $c$  which minimises the error we differentiate with respect to  $c$  and set this to zero. The  $c$  which minimises the error is

$$c = \frac{1}{N} \sum_i^N a_i = \frac{1}{N} \sum_i^N (y_i - mx_i) \quad (\text{S5})$$

Having found the optimal intercept for a given slope, we can loop through different possible slopes, find the ideal intercept and calculate the RMSE. We then select the slope that gives the lowest average RMSE for the different systems of interest.

## 2 Assignment of Atomic Surface Site Interaction Points

### 2.1 Atom Types

An extended set of atom type based on the SYBYL system was used (Table S6). We employed a sub-graph matching method: the molecular graph represents the connectivity of the molecule where the nodes are the molecule element and SYBYL atom type and the edges contain information on the bond order (17). The sub-graph matching algorithm employed was the VF2 algorithm (18) implemented using NetworkX (19).

## 2.2 Atomic Surface Areas

The calculated Molecular Electrostatic Potential Surface (MEPS) of a molecule is described by a set of points. Each point was assigned to the closest atom, defined as the atom with the smallest difference between the distance to the MEPS point and the van der Waals radius as defined in the Medeleev library (20). The patch of MEPS points assigned to each atom was then used to calculate the atomic surface area using the ConvexHull algorithm in the SciPy library (21). For each atom type, a minimum surface area parameter ( $A_{min}$ ) was defined using the  $0.0020 \text{ e bohr}^{-3}$  electron density isosurface to eliminate atoms that are too sterically hindered to make intermolecular contacts, and these atoms were not assigned any AIPs (see Table S1). In order to minimise the through-space interactions with neighbouring groups, the edge region of each surface patch was eliminated. This region was defined by the lowest 20% of local densities of neighbouring MEPS points. The local density of MEPS points was calculated for each point in the patch by counting the number of points within a 1 Å radius. The remaining points were used to assign AIPs.

| Atom Type       | Description                           | $A_{min} / \text{Å}^2$ |
|-----------------|---------------------------------------|------------------------|
| C.1             | sp carbon                             | 5.00                   |
| C.2             | sp2 carbon                            | 2.50                   |
| C.3             | sp3 carbon                            | -                      |
| C.ar            | aromatic carbon                       | 1.85                   |
| C.cat           | amidine carbon                        | 1.85                   |
| H.O.water       | hydrogen in water                     | 1.50                   |
| H.N.ammonia     | hydrogen in ammonia                   | 1.50                   |
| H.O             | hydrogen bound to oxygen              | 1.50                   |
| H.N             | hydrogen bound to nitrogen            | 1.50                   |
| H.soft          | hydrogen otherwise                    | 1.50                   |
| N.1             | sp nitrogen                           | 5.00                   |
| N.2             | sp2 nitrogen                          | 1.85                   |
| N.3.ammonia     | sp3 nitrogen in ammonia               | 3.00                   |
| N.3.primary     | sp3 nitrogen in primary amines        | 3.00                   |
| N.3.secondary   | sp3 nitrogen in secondary amines      | 3.00                   |
| N.3.tertiary    | sp3 nitrogen in tertiary amines       | 3.00                   |
| N.3.aniline     | sp3 nitrogen in pyramidal anilines    | 3.00                   |
| N.ar            | aromatic nitrogen with a lone pair    | 3.00                   |
| N.ar.no_lp      | aromatic nitrogen without a lone pair | 1.85                   |
| N.pl3.am        | planar amide nitrogen                 | 1.85                   |
| N.pl3.aniline   | planar aniline nitrogen               | 1.85                   |
| N.pl3.primary   | planar primary nitrogen               | 1.85                   |
| N.pl3.secondary | planar secondary nitrogen             | 1.85                   |
| N.pl3.tertiary  | planar tertiary nitrogen              | 1.85                   |
| N.pl3.nitro     | planar nitrogen in nitro              | 1.85                   |
| O.co2           | oxygen in carboxylate                 | 3.00                   |
| O.2.noxide      | oxygen in N-oxides                    | 3.00                   |
| O.2.sulfone     | oxygen in sulfones                    | 3.00                   |
| O.2.sulfoxide   | oxygen in sulfoxides                  | 3.00                   |
| O.2.po          | oxygen in phosphine oxides            | 3.00                   |
| O.2.carbonyl    | sp2 oxygen in ketones esters          | 3.00                   |

|              |                                  |      |
|--------------|----------------------------------|------|
| O.2.aldehyde | sp2 oxygen in aldehydes          | 3.00 |
| O.2.am       | sp2 oxygen in amides             | 3.00 |
| O.2.one_lp   | sp2 furan-type oxygen            | 3.00 |
| O.2.nitro    | sp2 oxygen in nitro groups       | 3.00 |
| O.2.other    | sp2 oxygen otherwise             | 3.00 |
| O.3.water    | sp3 oxygen in water              | 3.00 |
| O.3.alcohol  | sp3 oxygen in aliphatic alcohols | 3.00 |
| O.3.any      | sp3 oxygen otherwise             | 3.00 |
| P.3          | phosphorus                       | -    |
| Si           | silicon                          | -    |
| Se.3         | sp3 selenium                     | 5.00 |
| S.O          | sulfur in sulfoxides             | 5.00 |
| S.O2         | sulfur in sulfones               | -    |
| S.2.ps       | sulfur in phosphine sulfides     | 5.00 |
| S.2.phene    | sp2 sulfur in thiophenes         | 5.00 |
| S.2          | sp2 sulfur otherwise             | 5.00 |
| S.3          | sp3 sulfur                       | 5.00 |
| F            | fluorine                         | 5.00 |
| Cl           | chlorine                         | 5.00 |
| Br           | bromine                          | 5.00 |
| I            | iodine                           | 5.00 |

---

Table S6 Atom types used to assign AIPs.

### 2.3 Lone Pair AIP Locations

For oxygen, nitrogen and sulfur atoms (excluding atom types S.3, S.2.phene, N.ar lp, and all N.pl3), lone pair AIPs were located as local minima on the 0.0300 e bohr<sup>-3</sup> electron density isosurface. Ordinarily, the number of local minima matches the expected number of lone pairs, but there are cases, for example, when an atom is engaged in intramolecular H-bond, where fewer lone pair sites are found. For four atom types (O.2.sulfone, O.2.noxide, O.2.po, S.2.ps), the MEPS has high symmetry with no well-defined minima. These atom types are described by three lone pair sites symmetrically placed on the circle defined with respect to the electrostatic potential minimum on the MEPS (Figure S4).

### 2.4 Fluorine AIP Locations

Fluorine is represented by a single AIP, which is placed on the 0.0300 e bohr<sup>-3</sup> electron density isosurface on an extension of the C-F vector (Figure S5). The minimum on the 0300 e bohr<sup>-3</sup> electron density isosurface patch is used to assign the AIP value. In many perfluoro compounds, a negative electrostatic potential is not found on the 0.0300 e bohr<sup>-3</sup> electron density isosurface, and in these cases, the AIP is assigned a default value of zero (the same default applies to all lone pair AIPs).

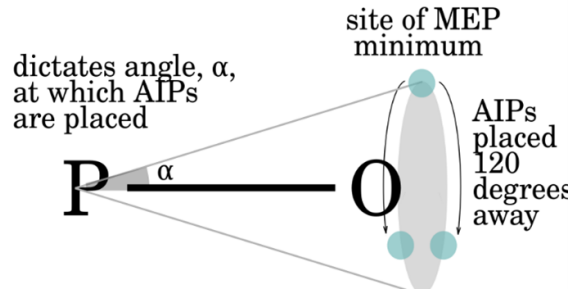

Figure S4 Location of AIPs for lone pairs on O.2.p.o. The minimum on the MEPS is identified and defines angle  $\alpha$  from the P-O vector. A cone described by this vector identifies the sites for other two AIPs, which are positioned symmetrically around the P-O bond.

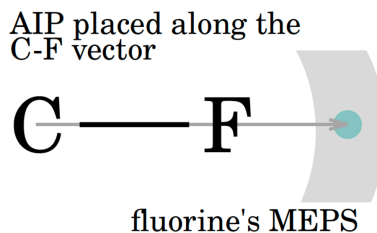

Figure S5 Location of the AIP for fluorine.

## 2.5 Hydrogen AIP Locations

Hydrogen is represented by a single AIP, which is placed on an extension of the X-H vector (Figure S6). The maximum on the  $0.0104 \text{ e bohr}^{-3}$  electron density isosurface patch is used to assign the AIP value.

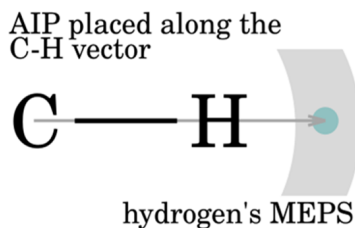

Figure S6 Location of the AIP for a hydrogen in a CH group.

## 2.6 $\sigma$ -Hole AIP Locations

For chlorine, bromine, iodine and S.2.ps atoms, the  $\sigma$ -hole AIP is placed on an extension of the bond vector as for hydrogen and fluorine, and the AIP value is assigned using the maximum on

the  $0.0104 \text{ e bohr}^{-3}$  electron density isosurface. Similarly, for sulfur atoms bonded to two carbon atoms (excluding atom type S.2 which does not have a  $\sigma$ -hole AIP), the two  $\sigma$ -hole AIPs are located using the C-S bond vectors. For the sulfur in a sulfoxide (S.O), the  $\sigma$ -hole AIP was located as the maximum on the  $0.0104 \text{ e bohr}^{-3}$  electron density isosurface.

## 2.7 Non-polar AIP Locations

The non-polar regions of the MEPS fall into two distinct categories: discrete patches that represent individual AIP sites, and contiguous surfaces that represent multiple AIPs.

For most atoms with  $\pi$ -system AIPs, the MEPs are non-contiguous with a patch above and below the plane of the ring in which the atom is located. In these cases, the k-medoid algorithm (22) from the sklearn library (23) was used to both separate the atomic MEPS into two clusters and find the centres. If the ratio of the two cluster areas was smaller than 4 or the distance between the two cluster centres was smaller than 1.5 times the radius of the element, the algorithm was deemed to have failed to correctly locate the two patches. In this case, the procedure was run three times using different initialisation algorithms. If two satisfactory clusters were not identified, the atom was deemed to have a single surface patch. One AIP is located at the centre of each patch, and the value is determined by the minimum in the MEPS of that patch.

For atoms with a contiguous MEPS surface that represents multiple non-polar AIPs (C.1, N.1, S.2.ps, Cl, Br, I), the approach illustrated in Figure S7 was used. The most negative site on the surface patch was found first, and the other three AIPs were arranged geometrically with respect to that site.

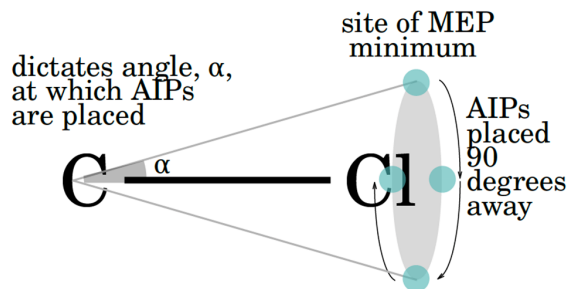

Figure S7 Location of non-polar AIPs on chlorine. The minimum on the MEPS is identified and defines angle  $\alpha$  from the C-Cl vector. A cone described by this vector identifies the sites for the other three AIPs, which are positioned symmetrically around the C-Cl bond.

For atoms that have both non-polar  $\pi$ -sites and lone pairs (N.1, N.2, S.2 and all O.2), the lone pair sites were first identified on the  $0.0300 \text{ e bohr}^{-3}$  electron density isosurface. All points that were within  $1.24 \text{ \AA}$  of these sites were excised from the  $0.0020 \text{ e bohr}^{-3}$  electron density isosurface (Figure S8), and the remaining surface was used to assign the non-polar AIPs that represent the  $\pi$ -sites as above. However in this case, the maximum in the MEPS was used to assign the AIP value to minimise the through-space effect of the very polar lone pair site.

For non-polar sulfur H-bond acceptors (S.2.phene and S.3), AIPs are located as local minima on the  $0.0020 \text{ e bohr}^{-3}$  electron density isosurface.

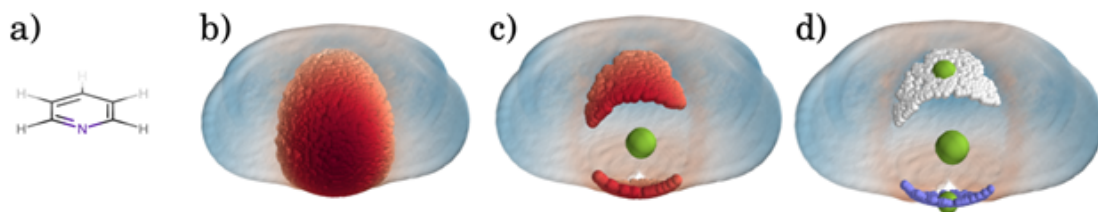

Figure S8 Analysis of the atomic surface of N.ar in pyridine. Excision of the lone pair MEP surface for pyridine in side view, as seen on (a) chemical structure, (b) the  $0.0020 \text{ e bohr}^{-3}$  electron density isosurface with the patch assigned to nitrogen highlighted by colouring the MEPS value, (c) excision of the all points on the atomic surface within  $1.24 \text{ \AA}$  of the nitrogen lone pair AIP (green), (d) identification of the two  $\pi$ -site patches (blue and white) and assignment of the two AIPs (green).

### 3 Free Energy of Transfer

#### 3.1 Data

The data used was obtained from refs. (24, 25). The original experimental data was obtained from measurements of the solvation free energies from gas into *n*-hexadecane and from gas into water obtained from liquid-gas chromatography.(26) The solvation free energies of basic or acidic functional groups have been corrected taking into account pKa values. The free energy of transfer from *n*-hexadecane to water is quoted at the 1M standard state.

| Common Name           | $\Delta G_{expt}^{\circ} / \text{kJ mol}^{-1}$ |
|-----------------------|------------------------------------------------|
| methane               | 6.5                                            |
| ethane                | 10.4                                           |
| butane                | 17.9                                           |
| 2-methylpropane       | 17.7                                           |
| pentane               | 22                                             |
| 2-methylbutane        | 21.5                                           |
| 2,2-dimethylpropane   | 20.9                                           |
| hexane                | 25.6                                           |
| 2-methylpentane       | 24.8                                           |
| 3-methylpentane       | 25.2                                           |
| 2,2-dimethylbutane    | 23.9                                           |
| 2,3-dimethylbutane    | 24.1                                           |
| heptane               | 29.3                                           |
| 2-methylhexane        | 29.4                                           |
| 3-methylhexane        | 28.7                                           |
| 2,2-dimethylpentane   | 28                                             |
| 2,3-dimethylpentane   | 27.8                                           |
| 2,4-dimethylpentane   | 27.9                                           |
| 3,3-dimethylpentane   | 27.6                                           |
| 2,2,3-trimethylbutane | 27.6                                           |
| octane                | 33                                             |



|                               |      |
|-------------------------------|------|
| 3-methylheptane               | 32.5 |
| 2,5-dimethylhexane            | 30.4 |
| 2,2,4-trimethylpentane        | 29.8 |
| 2,3,4-trimethylpentane        | 30.6 |
| nonane                        | 36.1 |
| 2-methyloctane                | 34.9 |
| 2,2,5-trimethylhexane         | 32.6 |
| decane                        | 40   |
| tricosane                     | 85.4 |
| tetracosane                   | 89   |
| 2,2,4,6,6-pentamethylheptane  | 39.9 |
| 2-methyldecane                | 41.9 |
| cyclopropane                  | 10.6 |
| cyclopentane                  | 19.2 |
| methylcyclopentane            | 23.3 |
| propylcyclopentane            | 30.6 |
| pentylcyclopentane            | 36.9 |
| cyclohexane                   | 22   |
| methylcyclohexane             | 26.1 |
| cis-1,2-dimethylcyclohexane   | 28.6 |
| trans-1,2-dimethylcyclohexane | 28.7 |
| cis-1,4-dimethylcyclohexane   | 28.8 |
| trans-1,4-dimethylcyclohexane | 28.8 |
| ethylcyclohexane              | 31.2 |
| propylcyclohexane             | 32.1 |
| butylcyclohexane              | 35.7 |
| t-butylcyclohexane            | 33.5 |
| 1,2,4-trimethylcyclohexane    | 33.0 |
| cyclooctane                   | 28.3 |
| dicyclohexyl                  | 38.3 |
| adamantane                    | 27.4 |
| jp-10                         | 24.5 |
| ethene                        | 7.0  |
| propene                       | 11.0 |
| but-1-ene                     | 14.5 |
| cis-but-2-ene                 | 15.6 |
| trans-but-2-ene               | 15.1 |
| 2-methylprop-1-ene            | 13.9 |
| pent-1-ene                    | 18.7 |
| cis-pent-2-ene                | 18.1 |
| trans-pent-2-ene              | 18.5 |
| 3-methylbut-1-ene             | 18.7 |
| 2-methylbut-1-ene             | 17.9 |
| 2-methylbut-2-ene             | 18.2 |
| hex-1-ene                     | 21.3 |
| cis-hex-2-ene                 | 21.9 |

|                               |      |
|-------------------------------|------|
| 2-methylpent-2-ene            | 21.5 |
| hept-1-ene                    | 24.4 |
| trans-hept-2-ene              | 25.2 |
| 3,3-dimethylpent-1-ene        | 22.8 |
| oct-1-ene                     | 28.4 |
| trans-oct-2-ene               | 28.5 |
| 2,4,4-trimethylpent-1-ene     | 27.2 |
| 2,4,4-trimethylpent-2-ene     | 26.2 |
| non-1-ene                     | 31.8 |
| dec-1-ene                     | 35.2 |
| undec-1-ene                   | 38.6 |
| dodec-1-ene                   | 42.2 |
| propadiene                    | 8.8  |
| buta-1,2-diene                | 11.6 |
| buta-1,3-diene                | 11.4 |
| 2-methylbuta-1,3-diene        | 14.8 |
| 2,3-dimethylbuta-1,3-diene    | 17.0 |
| penta-1,2-diene               | 14.9 |
| cis-penta-1,3-diene           | 14.9 |
| 4-methylpenta-1,3-diene       | 17.2 |
| penta-1,4-diene               | 15.5 |
| trans-hexa-1,3-diene          | 18.5 |
| hexa-1,5-diene                | 18.1 |
| hepta-1,6-diene               | 22.1 |
| 4,8-dimethyl-1,3,7-nonatriene | 29.7 |
| cyclopentene                  | 15.3 |
| cyclohexene                   | 18.4 |
| 1-methylcyclohexene           | 22.6 |
| cycloheptene                  | 24   |
| cyclooctene                   | 26.9 |
| cyclopenta-1,3-diene          | 11.8 |
| dicyclopentadiene             | 19.3 |
| cyclohexa-1,3-diene           | 15.2 |
| cyclohexa-1,4-diene           | 13.9 |
| cyclohepta-1,3,5-triene       | 15.5 |
| methylenecyclopentane         | 18.1 |
| methylenecyclohexane          | 21.6 |
| ethyne                        | 0.4  |
| propyne                       | 3.9  |
| but-1-yne                     | 8    |
| pent-1-yne                    | 11.5 |
| hex-1-yne                     | 15.5 |
| hept-1-yne                    | 19.6 |
| oct-1-yne                     | 23.0 |
| but-1-en-3-yne                | 8.6  |
| fluoroethane                  | 6.0  |

|                              |      |
|------------------------------|------|
| 1-fluoropropane              | 8.5  |
| 2-fluoropropane              | 8.6  |
| 1-fluorobutane               | 11.8 |
| 1-fluoropentane              | 15.1 |
| 1,1-difluoroethane           | 2.7  |
| 1,1,1-trifluoroethane        | 6.7  |
| 1,1,2-trifluoroethane        | -0.4 |
| 1,1,1,2-tetrafluoroethane    | 5.4  |
| 1,1,2,2-tetrafluoroethane    | 2.5  |
| pentafluoroethane            | 6.6  |
| 1,1,1-trifluoropropane       | 9.6  |
| 1,1,1-trifluorobutane        | 13.6 |
| 1,1,1-trifluoropentane       | 17.1 |
| 1,1,1-trifluorohexane        | 20.5 |
| 1,1,1-trifluoroheptane       | 23.8 |
| 1,1,1-trifluorooctane        | 27.2 |
| 1,1,1-trifluorononane        | 30.6 |
| 1,1,1-trifluorodecane        | 34   |
| 1,1,1-trifluoroundecane      | 37.4 |
| 1,1,1-trifluorododecane      | 40.8 |
| difluoromethane              | -1.1 |
| trifluoromethane             | 1.4  |
| tetrafluoromethane           | 8.5  |
| octafluorocyclobutane        | 18.6 |
| perfluorodimethylcyclobutane | 27.5 |
| 1,1-difluoroethene           | 8.5  |
| chloromethane                | 4.3  |
| dichloromethane              | 6    |
| trichloromethane             | 9.6  |
| tetrachloromethane           | 16.4 |
| chloroethane                 | 7.0  |
| 1,1-dichloroethane           | 9.7  |
| 1,2-dichloroethane           | 7.2  |
| 1,1,1-trichloroethane        | 14.8 |
| 1,1,2-trichloroethane        | 10.4 |
| 1,1,2,2-tetrachloroethane    | 11.4 |
| pentachloroethane            | 18.5 |
| 1-chloropropane              | 11.2 |
| 2-chloropropane              | 10.2 |
| 1,2-dichloropropane          | 10.9 |
| 1,3-dichloropropane          | 9.8  |
| 1,2,3-trichloropropane       | 10.3 |
| 1-chlorobutane               | 14.8 |
| 2-chlorobutane               | 14.5 |
| 2-chloro-2-methylpropane     | 17.5 |
| 1,4-dichlorobutane           | 10.3 |

|                             |      |
|-----------------------------|------|
| 1-chloropentane             | 18.1 |
| 1-chlorohexane              | 21.2 |
| 1-chloroheptane             | 25.2 |
| alpha-hexachlorocyclohexane | 20.1 |
| beta-hexachlorocyclohexane  | 19.3 |
| gamma-hexachlorocyclohexane | 19.2 |
| delta-hexachlorocyclohexane | 20.7 |
| endrin                      | 23.6 |
| a-endosulfan                | 28.6 |
| b-endosulfan                | 26.1 |
| perfluoropropene            | 12   |
| 1,1-dichloroethene          | 13.1 |
| cis-1,2-dichloroethene      | 9    |
| trans-1,2,-dichloroethene   | 9.8  |
| trichloroethene             | 15.3 |
| tetrachloroethene           | 20.8 |
| 3-chloroprop-1-ene          | 9.6  |
| 2-chlorobuta-1,3-diene      | 12.7 |
| hexachlorobuta-1,3-diene    | 28.3 |
| 3-chlorobut-1-ene           | 11.4 |
| 4-chlorobut-1-ene           | 11.5 |
| 1-chloro-2-methylprop-1-ene | 14.4 |
| 3-chloro-2-methylprop-1-ene | 10.2 |
| 5-chloropent-1-yne          | 7.1  |
| bromomethane                | 5.9  |
| dibromomethane              | 8.3  |
| tribromomethane             | 12.7 |
| bromoethane                 | 9    |
| 1,2-dibromoethane           | 9.5  |
| 1,1,2,2-tetrabromoethane    | 16.8 |
| 1-bromopropane              | 12.6 |
| 2-bromopropane              | 11.6 |
| 1-bromo-2-methylpropane     | 16.8 |
| 2-bromo-2-methylpropane     | 18.4 |
| 1-bromopentane              | 20.2 |
| 1-bromohexane               | 24.3 |
| 1-bromoheptane              | 28.0 |
| 1-bromooctane               | 31.5 |
| 1-bromoadamantane           | 25.0 |
| bromoethene                 | 9.2  |
| iodomethane                 | 8.3  |
| diiodomethane               | 12   |
| iodoethane                  | 11.6 |
| 1-iodopropane               | 15.6 |
| 1-iodobutane                | 19.7 |
| 1-iodopentane               | 23   |

|                                                    |      |
|----------------------------------------------------|------|
| 1-iodohexane                                       | 26.7 |
| 1-iodoheptane                                      | 30.2 |
| fluorochloromethane                                | 2.4  |
| chlorobromomethane                                 | 7.1  |
| fluorochlorobromomethane                           | 7.7  |
| fluorodichloromethane                              | 6.6  |
| fluorodibromomethane                               | 6.5  |
| fluorotrichloromethane                             | 13.7 |
| difluorodichloromethane                            | 12.8 |
| trifluorochloromethane                             | 10.7 |
| 1,1-difluoro-1-chloroethane                        | 8.7  |
| 1-fluoro-1,1-dichloroethane                        | 11.8 |
| 1,1,2-trifluoro-1-chloroethane                     | 1.0  |
| 1,1,1-trifluoro-2,2-dichloroethane                 | 9.9  |
| 1,1,1-trifluoro-2-chloro-2-bromoethane             | 10.6 |
| 1,1,1,2-tetrafluoro-2-bromoethane                  | 10.4 |
| 1,1,1,2-tetrafluoro-2-chloroethane                 | 8.6  |
| 1,1-difluoro-1,2,2-trichloroethane                 | 15.4 |
| 1,1,2-trifluoro-1-bromo-2-chloroethane             | 13.6 |
| 1,1,2-trifluorotrichloroethane                     | 20.0 |
| 1,2-difluorotetrachloroethane                      | 20.9 |
| 1,2-dichlorotetrafluoroethane                      | 17.6 |
| chloropentafluoroethane                            | 15.2 |
| 1-bromo-3-chloropropane                            | 11.2 |
| 1,2,2,3-tetrafluoro-1-chloro-3-bromopropane        | 11.9 |
| 1,2,2,3-tetrafluoro-1-chloro-1-bromopropane        | 14.2 |
| 1,2,2,3-tetrafluoro-1,3-dichloropropane            | 9.4  |
| 1,2,2,3-tetrafluoro-1,1-dichloropropane            | 13.5 |
| 1,1,2,2,3-pentafluoro-3,3-dibromopropane           | 14.8 |
| 2-bromoheptafluoropropane                          | 20.9 |
| 2-chloroheptafluoropropane                         | 16.3 |
| 1,2,3-trichloropentafluoropropane                  | 23.3 |
| 2,3-dichlorooctafluorobutane                       | 26.2 |
| 1,2,3,4-tetrachlorohexafluorobutane                | 29.7 |
| 1-bromo-1,1,2,2,3,3,4,4,5,5,6,6-dodecafluorohexane | 30.2 |
| 1,4-dibromooctafluorobutane                        | 28.1 |
| 1,1,-difluoro-2-chloroethene                       | 6.3  |
| cis-1,2-dichlorohexafluorocyclobutane              | 22.2 |
| trans-1,2-dichlorohexafluorocyclobutane            | 22.1 |
| racemic-1,2-dichlorohexafluorocyclobutane          | 22.5 |
| dimethylether                                      | -0.6 |
| diethylether                                       | 4.2  |
| dipropylether                                      | 11.7 |
| diisopropylether                                   | 8    |
| dibutylether                                       | 18.9 |
| methylethylether                                   | 0.3  |

|                                                 |       |
|-------------------------------------------------|-------|
| methyl-tert-butylether                          | 5.2   |
| methyl-tert-pentylether                         | 8.5   |
| ethyl-tert-butylether                           | 8.4   |
| ethyl-t-pentylether                             | 9.8   |
| isopropyl-tert-butylether                       | 12.6  |
| methylcyclohexylether                           | 8.2   |
| ethylvinylether                                 | 3.5   |
| dimethoxymethane                                | -1.7  |
| 1,1-diethoxypropane                             | 4.2   |
| 1,1-dimethoxybutane                             | 0.7   |
| 1,1-dibutoxybutane                              | 21.2  |
| 2,2-dimethoxypropane                            | 1.3   |
| 2,2-diethoxypropane                             | 1.9   |
| 1,2-dimethoxyethane                             | -5.1  |
| 1-butoxy-2-methoxypropane                       | 5.6   |
| ethylene oxide                                  | -5.3  |
| 1,2-butylene oxide                              | 1.9   |
| 1,2-epoxybut-3-ene                              | 0.3   |
| cyanoethylene oxide                             | -14.4 |
| 1,2:3,4-diepoxybutane                           | -9.8  |
| bis(2-chloroethyl) ether                        | 3.7   |
| bis(2-chloroisopropyl)ether                     | 6.6   |
| 1-bromo-2,3-epoxypropane                        | 0.0   |
| cf3ch2ocf3                                      | 12.8  |
| 1,1,1,2-tetrafluoro-2-chlorofluoromethoxyethane | 10.6  |
| cf3ch2ocf2cl                                    | 16.1  |
| chcl2cf2och3                                    | 11.6  |
| cf3chclocf2h                                    | 11.1  |
| chfclcf2ocf2h                                   | 9.6   |
| (cf3)2ch-o-ch2f                                 | 8.8   |
| cf3ch2och=ch2                                   | 5.7   |
| bis(2,2,2-trifluoroethyl)ether                  | 7.4   |
| (cf3)2choch3                                    | 11.5  |
| chf2ochf3                                       | 8.3   |
| chf2cf2chfochf2                                 | 7.4   |
| tetrahydrofuran                                 | 0.5   |
| 2-methyltetrahydrofuran                         | 2.3   |
| 2,5-dimethyltetrahydrofuran                     | 4.8   |
| 2,5-dimethoxytetrahydrofuran                    | -6.3  |
| 1,3-dioxane                                     | -7.5  |
| tetrahydropyran                                 | 4.1   |
| 1,4-dioxane                                     | -4.6  |
| formaldehyde                                    | -7.4  |
| acetaldehyde                                    | -7.6  |
| propionaldehyde                                 | -4    |
| butyraldehyde                                   | -0.3  |

|                              |      |
|------------------------------|------|
| 2-methylpropionaldehyde      | 0.1  |
| pentanal                     | 3.6  |
| hexanal                      | 7.4  |
| 2-methylpentanal             | 8.4  |
| heptanal                     | 10.9 |
| octanal                      | 15.3 |
| nonanal                      | 18.9 |
| decanal                      | 22.3 |
| undecanal                    | 26.1 |
| dodecanal                    | 30.0 |
| tridecanal                   | 33.5 |
| tetradecanal                 | 37.3 |
| glutaraldehyde               | -7.4 |
| 2-(4-ethylcyclohexyl)ethanal | 18.7 |
| propenal                     | -4.2 |
| trans-but-2-en-1-al          | -3.3 |
| trans-pent-2-en-1-al         | 3    |
| trans-2-methylbut-2-en-1-al  | 1.4  |
| 3-methylbut-2-en-1-al        | 2.6  |
| trans-hex-2-en-1-al          | 6.4  |
| cis-hex-3-en-1-al            | 6.7  |
| 2-methylpent-2-en-1-al       | 4.9  |
| trans-hept-2-en-1-al         | 10.0 |
| trans-oct-2-en-1-al          | 13.6 |
| oct-7-en-1-al                | 10.4 |
| trans-non-2-en-1-al          | 17.0 |
| trans-dec-2-en-1-al          | 20.6 |
| trans-undec-2-en-1-al        | 24.1 |
| e,e-nona-2,4-dienal          | 12.8 |
| e,z-nona-2,6-dienal          | 13.2 |
| e,e-deca-2,4-dienal          | 16   |
| chloral hydrate              | -10  |
| propanone                    | -6.4 |
| butanone                     | -2.5 |
| pentan-2-one                 | 1.0  |
| pentan-3-one                 | 1.8  |
| 3-methylbutan-2-one          | 1.8  |
| hexan-2-one                  | 5    |
| hexan-3-one                  | 4.9  |
| 4-methylpentan-2-one         | 4.8  |
| 3,3-dimethylbutan-2-one      | 3.7  |
| heptan-2-one                 | 8.7  |
| heptan-4-one                 | 8.3  |
| 5-methylhexan-2-one          | 7.3  |
| 2,4-dimethylpentan-3-one     | 7.9  |
| octan-2-one                  | 12.3 |

|                                 |       |
|---------------------------------|-------|
| 3-methylheptan-4-one            | 11.6  |
| octan-4-one                     | 11.6  |
| nonan-2-one                     | 16.6  |
| nonan-5-one                     | 15.7  |
| 2,2,4,4-tetramethylpentan-3-one | 14.7  |
| decan-2-one                     | 20.1  |
| undecan-2-one                   | 23.7  |
| cyclopropylmethylketone         | -1.4  |
| dicyclopropylketone             | 1.1   |
| cyclohexylmethylketone          | 7.6   |
| cyclopentanone                  | -1.3  |
| 2-methylcyclopentanone          | 2.1   |
| 3-ethylcyclopentanone           | 5.1   |
| cyclohexanone                   | 1.1   |
| 2-methylcyclohexanone           | 5.6   |
| cycloheptanone                  | 5.5   |
| cyclooctanone                   | 9.1   |
| pent-1-en-3-one                 | -1.1  |
| pent-3-en-2-one                 | -1.7  |
| non-8-en-2-one                  | 11.6  |
| 6-methylhepta-3,5-diene-2-one   | 4.5   |
| isophorone                      | 9.0   |
| 1-methylcyclopent-1-en-3-one    | -2.2  |
| 2-methylcyclopent-2-en-1-one    | -1.4  |
| cyclopenteneone                 | -5.2  |
| butan-2,3-dione                 | -6    |
| pentan-2,3-dione                | -2.5  |
| pentane-2,4-dione               | -1.2  |
| hexane-2,5-dione                | -9.9  |
| nonane-4,6-dione                | 11.8  |
| cyclohexan-1,4-dione            | -7.4  |
| cyclohexan-1,3-dione            | -4.8  |
| 1,1,1-trifluoropentan-2,4-dione | -4.1  |
| thenoyl trifluoroacetone        | 3.3   |
| diethyl carbonate               | 4.3   |
| propylene carbonate             | -10.7 |
| ascorbic acid                   | -30.6 |
| g-butyrolactone                 | -9.6  |
| d-pentanolactone                | -10.1 |
| methyl formate                  | -4.3  |
| ethyl formate                   | -0.6  |
| propyl formate                  | 3.5   |
| isopropyl formate               | 4.3   |
| butyl formate                   | 6.7   |
| isobutyl formate                | 6.6   |
| pentyl formate                  | 10.3  |



|                                |       |
|--------------------------------|-------|
| isopentyl formate              | 10    |
| methyl acetate                 | -2.2  |
| ethyl acetate                  | 0.9   |
| propyl acetate                 | 4.4   |
| isopropyl acetate              | 3.5   |
| butyl acetate                  | 8.0   |
| isobutyl acetate               | 8.2   |
| pentyl acetate                 | 11.4  |
| isopentyl acetate              | 12.1  |
| hexyl acetate                  | 15    |
| heptyl acetate                 | 18.7  |
| vinyl acetate                  | 0.9   |
| methyl propanoate              | 1.6   |
| ethyl propanoate               | 4.8   |
| propyl propanoate              | 8.8   |
| isopropyl propanoate           | 7.2   |
| butyl propanoate               | 11.7  |
| isobutyl propanoate            | 11    |
| sec-butyl propanoate           | 10.7  |
| pentyl propanoate              | 15.9  |
| methyl butanoate               | 4.6   |
| ethyl butanoate                | 8.2   |
| propyl butanoate               | 12    |
| methyl pentanoate              | 8.6   |
| ethyl pentanoate               | 11.1  |
| butyl pentanoate               | 19.2  |
| methyl hexanoate               | 11.6  |
| ethyl hexanoate                | 14.9  |
| ethyl isobutanoate             | 7.3   |
| isobutyl isobutanoate          | 15.1  |
| methyl trimethylacetate        | 6.7   |
| methyl cyclopropanecarboxylate | 0.2   |
| methyl cyclohexanecarboxylate  | 11.1  |
| glycerol triacetate            | -9.0  |
| acetol acetate                 | -7.9  |
| ethyl acetoacetate             | -3.9  |
| ethylidene diacetate           | -2.3  |
| ethyl trifluoroacetate         | 4.8   |
| ethyl trichloroacetate         | 13.6  |
| dibutyl succinate              | 16.9  |
| diethyl tartrate               | -18.3 |
| triethyl citrate               | -10.7 |
| acetonitrile                   | -6.3  |
| proprionitrile                 | -4.2  |
| 1-cyanopropane                 | -0.7  |
| 1-cyanobutane                  | 3.0   |

|                        |       |
|------------------------|-------|
| methacrylonitrile      | 1.8   |
| allyl cyanide          | -1.2  |
| 1,2-dicyanoethane      | -13.7 |
| 1,3-dicyanopropane     | -11.1 |
| 1,4-dicyanobutane      | -9.7  |
| methylamine            | -11.6 |
| ethylamine             | -9.2  |
| propylamine            | -6.2  |
| butylamine             | -2.8  |
| pentylamine            | 0.8   |
| hexylamine             | 4.3   |
| heptylamine            | 7.8   |
| octylamine             | 11.0  |
| cyclohexylamine        | 2.5   |
| dimethylamine          | -8.8  |
| diethylamine           | -3.4  |
| dipropylamine          | 3.8   |
| diisopropylamine       | 3.0   |
| dibutylamine           | 11.2  |
| methylethylamine       | -3.9  |
| trimethylamine         | -4.2  |
| triethylamine          | 3.9   |
| methyldiethylamine     | 3.1   |
| dimethylisopropylamine | 1.9   |
| cyanamide              | -15.2 |
| 2-methoxyethylamine    | -13.2 |
| 2-ethoxyethylamine     | -9.8  |
| 3-methoxypropylamine   | -11.6 |
| 1,2-diaminocyclohexane | -19.7 |
| 1,3-diaminocyclohexane | -19.7 |
| 1,4-diaminocyclohexane | -19.7 |
| guanidine              | -25.1 |
| 4-aminobutylguanidine  | -33.4 |
| diethyldiimide         | 5.6   |
| nitromethane           | -6    |
| nitroethane            | -1.8  |
| 1-nitropropane         | 2.5   |
| 2-nitropropane         | 1.4   |
| 1-nitrobutane          | 6.6   |
| 1-nitropentane         | 10.7  |
| formamide              | -28.6 |
| acetamide              | -26.0 |
| propionamide           | -20.1 |
| butanamide             | -18.5 |
| pentanamide            | -14.8 |
| n-methylformamide      | -21.2 |

|                             |       |
|-----------------------------|-------|
| n-methylacetamide           | -22.3 |
| n-methylpropanamide         | -18.2 |
| n-ethylacetamide            | -16.4 |
| n-butylacetamide            | -11.4 |
| n,n-dimethylformamide       | -14.6 |
| n,n-dibutylformamide        | 7.3   |
| n,n-dimethylacetamide       | -13.7 |
| succinamide                 | -42.3 |
| chloralformamide            | -15.8 |
| iodoacetamide               | -18.5 |
| methylurea                  | -28.6 |
| 1,1-dimethylurea            | -24.9 |
| 1,3-dimethylurea            | -18.6 |
| trimethylurea               | -14.7 |
| tetramethylurea             | -5.6  |
| ethylurea                   | -24.1 |
| 1,1-diethylurea             | -16.5 |
| 1,3-diethylurea             | -11.6 |
| triethylurea                | -4.4  |
| tetraethylurea              | 6.1   |
| propylurea                  | -21.0 |
| butylurea                   | -16.4 |
| adalin                      | -11.4 |
| methylacetylurea            | -21.1 |
| metformin                   | -30.1 |
| ethyl carbamate             | -13.2 |
| methyl urethan              | -7.5  |
| ethyl urethan               | -4.2  |
| propyl urethan              | -0.7  |
| isopropyl urethan           | -2.4  |
| butyl urethan               | 2.7   |
| isobutyl urethan            | 1.7   |
| isopentyl urethan           | 5     |
| 2-ethyl-2-methylsuccinimide | -15.2 |
| 1,6-hexanediisocyanate      | 16    |
| hexyl isocyanate            | 18.3  |
| formic acid                 | -21.6 |
| acetic acid                 | -17.5 |
| propanoic acid              | -14   |
| butanoic acid               | -10.7 |
| 2-methylpropanoic acid      | -10.4 |
| pentanoic acid              | -7    |
| 2-methylbutanoic acid       | -6.8  |
| 3-methylbutanoic acid       | -7.2  |
| 2,2-dimethylpropanoic acid  | -6.7  |
| hexanoic acid               | -3.5  |

|                                         |       |
|-----------------------------------------|-------|
| 2-methylpentanoic acid                  | -3.2  |
| 3-methylpentanoic acid                  | -3.7  |
| 2,2-dimethylbutanoic acid               | -3.4  |
| heptanoic acid                          | -0.1  |
| octanoic acid                           | 3.0   |
| nonanoic acid                           | 6.7   |
| decanoic acid                           | 10.4  |
| undecanoic acid                         | 13.7  |
| dodecanoic acid                         | 17    |
| tridecanoic acid                        | 20.6  |
| tetradecanoic acid                      | 24.1  |
| pentadecanoic acid                      | 27.8  |
| hexadecanoic acid                       | 31.3  |
| heptadecanoic acid                      | 34.9  |
| octadecanoic acid                       | 38.1  |
| nonadecanoic acid                       | 41.6  |
| eicosanoic acid                         | 45.1  |
| heneicosanoic acid                      | 48.6  |
| docosanoic acid                         | 52.1  |
| tricosanoic acid                        | 55.6  |
| tetracosanoic acid                      | 59.0  |
| 2-isopropyl-3-methylbutanoic acid       | 2.3   |
| propenoic acid                          | -13.0 |
| trans-2-butenoic acid                   | -10.8 |
| 2-methylpropenoic acid                  | -9.1  |
| methyl 2-cyano-2-propenoic acid         | -0.9  |
| ethyl 2-cyano-2-propenoic acid          | 2.1   |
| isopropyl 2-cyano-2-propenoic acid      | 4.6   |
| 2-methoxyethyl 2-cyano-2-propenoic acid | -3.4  |
| sorbic acid                             | -7.6  |
| linoleic acid                           | 29.5  |
| fluoroacetic acid                       | -22.0 |
| difluoroacetic acid                     | -20.7 |
| trifluoroacetic acid                    | -19.5 |
| chloroacetic acid                       | -20.3 |
| dichloroacetic acid                     | -17.1 |
| trichloroacetic acid                    | -12.3 |
| bromoacetic acid                        | -18.8 |
| dibromoacetic acid                      | -13.3 |
| tribromoacetic acid                     | -7.7  |
| iodoacetic acid                         | -15.2 |
| diiodoacetic acid                       | -8.7  |
| triiodoacetic acid                      | -1.5  |
| methoxyacetic acid                      | -17.7 |
| ethoxyacetic acid                       | -15.6 |
| 2-hydroxybutanoic acid                  | -12.7 |

|                             |       |
|-----------------------------|-------|
| tretinoin                   | 23.8  |
| pyruvic acid                | -20.8 |
| acetylglycine               | -34.5 |
| acetic anhydride            | -7.9  |
| malonic acid                | -30.7 |
| succinic acid               | -30.1 |
| glutaric acid               | -29.2 |
| adipic acid                 | -28.4 |
| pimelic acid                | -24.9 |
| suberic acid                | -22.8 |
| citric acid                 | -22.5 |
| malic acid                  | -37.8 |
| tartaric acid               | -38.8 |
| dimethylmalonic acid        | -23.8 |
| cyclopropanecarboxylic acid | -10.3 |
| cyclobutanecarboxylic acid  | -7.6  |
| cyclopentanecarboxylic acid | -4.8  |
| cyclohexanecarboxylic acid  | -1.9  |
| chlorogenic acid            | -65   |
| beta-carboxyadipic acid     | -45.7 |
| aconitic acid               | -39.7 |
| fumaric acid                | -19.3 |
| maleic acid                 | -24.1 |
| diglycolic acid             | -34.4 |
| lactic acid                 | -23.8 |
| peracetic acid              | -17.7 |
| water                       | -25.3 |
| methanol                    | -15.8 |
| ethanol                     | -12.4 |
| propan-1-ol                 | -8.7  |
| propan-2-ol                 | -9.8  |
| butan-1-ol                  | -4.9  |
| 2-methylpropan-1-ol         | -5.1  |
| butan-2-ol                  | -6    |
| 2-methylpropan-2-ol         | -7.5  |
| pentan-1-ol                 | -1.4  |
| pentan-2-ol                 | -2.2  |
| pentan-3-ol                 | -1.9  |
| 2-methylbutan-1-ol          | -1.3  |
| 3-methylbutan-1-ol          | -1.3  |
| 2-methylbutan-2-ol          | -3.4  |
| 3-methylbutan-2-ol          | -2.1  |
| hexan-1-ol                  | 2.2   |
| hexan-3-ol                  | 2.1   |
| 2-methylpentan-1-ol         | 1.7   |
| 3-methylpentan-1-ol         | 1.5   |

|                         |       |
|-------------------------|-------|
| 4-methylpentan-1-ol     | 2.1   |
| 2-methylpentan-2-ol     | -0.1  |
| 3-methylpentan-2-ol     | 1.3   |
| 4-methylpentan-2-ol     | 1.7   |
| 2-methylpentan-3-ol     | -0.3  |
| 3,3-dimethylbutan-1-ol  | -0.3  |
| 2,3-dimethylbutan-2-ol  | -0.2  |
| heptan-1-ol             | 5.9   |
| 2-methylhexan-2-ol      | 3.6   |
| 3-methylhexan-2-ol      | 5.5   |
| 2-methylhexan-3-ol      | 3.4   |
| 3-methylhexan-3-ol      | 3.6   |
| 3-ethylpentan-3-ol      | 3.8   |
| 2,2-dimethylpentan-3-ol | 6.5   |
| 2,4-dimethylpentan-3-ol | 3.5   |
| octan-1-ol              | 9.2   |
| nonan-1-ol              | 13    |
| 2,6-dimethylheptan-4-ol | 8.7   |
| decan-1-ol              | 16.8  |
| undecan-1-ol            | 20.7  |
| dodecan-1-ol            | 23.8  |
| tridecan-1-ol           | 27.2  |
| tetradecan-1-ol         | 30.7  |
| pentadecan-1-ol         | 34.3  |
| hexadecan-1-ol          | 37.8  |
| heptadecan-1-ol         | 41.4  |
| octadecan-1-ol          | 45    |
| nonadecan-1-ol          | 48.5  |
| eicosan-1-ol            | 52.1  |
| cyclopentanol           | -4.5  |
| cyclohexanol            | -1.4  |
| cycloheptanol           | 2.2   |
| cyclooctanol            | 7.1   |
| adamantan-1-ol          | 2.7   |
| prop-2-yn-1-ol          | -14.1 |
| but-2-yn-1-ol           | -10.4 |
| but-3-yn-1-ol           | -13   |
| pent-2-yn-1-ol          | -6.8  |
| pent-3-yn-1-ol          | -9.1  |
| hex-2-yn-1-ol           | -3.0  |
| hex-5-yn-1-ol           | -6.0  |
| hept-2-yn-1-ol          | 0.4   |
| oct-2-yn-1-ol           | 3.8   |
| non-2-yn-1-ol           | 7.3   |
| prop-2-en-1-ol          | -9.9  |
| pent-1-en-3-ol          | -5.6  |

|                                                         |       |
|---------------------------------------------------------|-------|
| hex-1-en-3-ol                                           | -2.3  |
| cis-hex-3-en-1-ol                                       | -0.7  |
| trans-hex-3-en-1-ol                                     | -2.2  |
| hept-1-en-3-ol                                          | 1.0   |
| oct-1-en-3-ol                                           | 4.4   |
| trans-oct-2-en-1-ol                                     | 6.4   |
| cyclohex-2-en-1-ol                                      | -5.4  |
| 4-hydroxy-2-nonenal                                     | -2.2  |
| 2,2,2-trifluoroethanol                                  | -11.1 |
| 1,1,1-trifluoropropan-2-ol                              | -5.4  |
| 2,2,3,3-tetrafluoropropan-1-ol                          | -8.1  |
| 2,2,3,3,3-pentafluoropropan-1-ol                        | -3.3  |
| 1,1,1,3,3,3-hexafluoropropan-2-ol                       | -7.8  |
| 1,1,1,3,3,3-hexafluoro-2-methylpropan-2-ol              | 1.7   |
| 2,2,3,4,4,4-hexafluorobutan-1-ol                        | -3.4  |
| 2,2,3,3,4,4,4-heptafluorobutan-1-ol                     | 1.1   |
| 3,3,4,4,5,5,5-heptafluoropentan-2-ol                    | 5.1   |
| 2,2,3,3,4,4,5,5-octafluoropentan-1-ol                   | 0.0   |
| 2,2,3,3,4,4,5,5,6,6,6-undecafluorohexan-1-ol            | 11.2  |
| 2,2,3,3,4,4,5,5,6,6,7,7,7-dodecafluoroheptan-1-ol       | 7.6   |
| 2,2,3,3,4,4,5,5,6,6,7,7,7,7-tridecafluoroheptan-1-ol    | 16.5  |
| 3,3,4,4,5,5,6,6,7,7,8,8,8-tridecafluorooctan-1-ol       | 4.2   |
| 2,2,3,3,4,4,5,5,6,6,7,7,8,8,8-pentadecafluorooctan-1-ol | 20.1  |
| 2-chloroethanol                                         | -12.3 |
| 2,2,2-trichloroethanol                                  | -4.1  |
| 3-chloropropan-1-ol                                     | -9.5  |
| 1,3-dichloropropan-2-ol                                 | -8.4  |
| cyclopropanemethanol                                    | -9.0  |
| cyclobutanemethanol                                     | -5.3  |
| cyclopentanemethanol                                    | -1.6  |
| cyclohexanemethanol                                     | 2.0   |
| cycloheptanemethanol                                    | 5.6   |
| cyclooctanemethanol                                     | 9.2   |
| cyclononanemethanol                                     | 13    |
| cyclodecanemethanol                                     | 16.6  |
| cycloundecanemethanol                                   | 20.3  |
| cyclododecanemethanol                                   | 23.9  |
| cyclotridecanemethanol                                  | 27.6  |
| cyclotetradecanemethanol                                | 31.3  |
| 2-methoxyethanol                                        | -14.8 |
| 2-ethoxyethanol                                         | -12.5 |
| 2-propoxyethanol                                        | -7.9  |
| 2-butoxyethanol                                         | -4.9  |
| 2-isopropoxyethanol                                     | -9    |
| 2-isobutoxyethanol                                      | -6.8  |
| 1-methoxypropan-2-ol                                    | -13.6 |

|                                |       |
|--------------------------------|-------|
| ethan-1,2-diol                 | -25.3 |
| propan-1,2-diol                | -23.5 |
| propan-1,3-diol                | -29.5 |
| butan-1,2-diol                 | -21.3 |
| pentan-1,2-diol                | -17.9 |
| pentan-2,4-diol                | -24.1 |
| pentan-1,5-diol                | -23.5 |
| hexan-1,2-diol                 | -14.5 |
| hexan-1,5-diol                 | -20.4 |
| hexan-1,6-diol                 | -20.6 |
| heptan-1,2-diol                | -11.1 |
| heptan-1,7-diol                | -18.0 |
| octan-1,2-diol                 | -7.7  |
| octan-1,8-diol                 | -14.8 |
| trans-cyclohexane-1,2-diol     | -20.7 |
| cis-cyclohexane-1,2-diol       | -16.7 |
| trans-cyclooctane-1,2-diol     | -13.6 |
| cis-cyclooctane-1,2-diol       | -9.4  |
| erythritol                     | -46.2 |
| mannitol                       | -51.4 |
| 3-hydroxybutan-2-one           | -12.4 |
| 4-hydroxy-4-methylpentan-2-one | -8.1  |
| hydroxypropanone               | -16.1 |
| hex-3-yne-2,5-diol             | -26.4 |
| 2,2-dimethylpropan-1,3-diol    | -22.2 |
| 3-methylbutan-1,3-diol         | -27.9 |
| cyanomethanol                  | -21.8 |
| ethyl lactate                  | -6.4  |
| methyl lactate                 | -9.1  |
| chloralose                     | -18.7 |
| 3-chloropropan-1,2-diol        | -18.8 |
| glycolamide                    | -30.2 |
| lactamide                      | -28.6 |
| ethyl glycollate               | -12.7 |
| 2-amino-2-methylpropan-1-ol    | -20.7 |
| 2-aminoethanol                 | -24.9 |
| 3-aminopropan-1-ol             | -21.5 |
| 4-aminobutan-1-ol              | -22.4 |
| 5-aminopentan-1-ol             | -20.1 |
| 6-aminohexan-1-ol              | -16.7 |
| n-methyldiethanolamine         | -23   |
| n-methylethanolamine           | -19.9 |
| n-ethylethanolamine            | -16.1 |
| n,n-dimethylethanolamine       | -13.3 |
| n,n-diethylethanolamine        | -6.8  |
| 1,2,3,4,5-pentahydroxypentane  | -34.5 |



|                                                |       |
|------------------------------------------------|-------|
| but-2-en-1,4-diol                              | -22.3 |
| but-3-en-1,2-diol                              | -22.8 |
| 1,2-epoxybut-3,4-diol                          | -31.6 |
| tetrahydrothiophene                            | 8     |
| bis(2-chloroethyl)sulfide                      | 11.1  |
| dimethylsulfoxide                              | -22.5 |
| tetramethylenesulfone                          | -12.6 |
| sulfonal                                       | -1.3  |
| allicin                                        | 2.5   |
| sulfur hexafluoride                            | 12    |
| carbon disulphide                              | 14.4  |
| thiourea                                       | -29.6 |
| allylthiourea                                  | 0.0   |
| allyl isothiocyanate                           | 10.0  |
| methional                                      | -2.7  |
| sulfosalicylic acid                            | -35.5 |
| tributylphosphine oxide                        | -3.5  |
| triethylphosphine oxide                        | 8.6   |
| trioctylphosphine oxide                        | 22.4  |
| 1,2,2-trimethylpropylmethylphosphonofluoridate | 4.1   |
| diethyl phosphate                              | -28.1 |
| dibutyl phosphate                              | -10.7 |
| dioctyl phosphate                              | 18.3  |
| trimethyl phosphate                            | -13.5 |
| triethyl phosphate                             | -4.5  |
| tripropyl phosphate                            | 4.3   |
| tributyl phosphate                             | 13.9  |
| dimethyl methanephosphonate                    | -8    |
| diphenylphosphoric acid                        | -20   |
| dibenzylphosphoric acid                        | -12.4 |
| bis(4-chlorophenyl)phosphoric acid             | -8.9  |
| dibutylphosphorodithiotic acid                 | 12.4  |
| dimethyl dichlorovinylphosphonate              | 1.7   |
| trichlorfon                                    | -14.0 |
| trimethylborate                                | -2.2  |
| benzene                                        | 12.3  |
| toluene                                        | 15.3  |
| ethylbenzene                                   | 18.3  |
| o-xylene                                       | 18.7  |
| m-xylene                                       | 18.4  |
| p-xylene                                       | 18.5  |
| propylbenzene                                  | 21.9  |
| isopropylbenzene                               | 22    |
| 1,2,3-trimethylbenzene                         | 21.0  |
| 1,2,4-trimethylbenzene                         | 21.7  |
| 1,3,5-trimethylbenzene                         | 21.0  |

|                            |      |
|----------------------------|------|
| 2-ethyltoluene             | 20.5 |
| 4-ethyltoluene             | 20.5 |
| butylbenzene               | 25.3 |
| isobutylbenzene            | 26.4 |
| sec-butylbenzene           | 23.8 |
| tert-butylbenzene          | 23.3 |
| 1,2,4,5-tetramethylbenzene | 25.7 |
| 4-isopropyltoluene         | 23.3 |
| pentylbenzene              | 28.9 |
| hexylbenzene               | 32.5 |
| styrene                    | 16.8 |
| a-methylstyrene            | 19.3 |
| 3-methylstyrene            | 18.6 |
| 4-methylstyrene            | 18.7 |
| allylbenzene               | 17.3 |
| trans-stilbene             | 27.1 |
| biphenyl                   | 23.2 |
| naphthalene                | 19.4 |
| 1-methylnaphthalene        | 21.8 |
| 2-methylnaphthalene        | 22.1 |
| 1,2-dimethylnaphthalene    | 24.6 |
| 1,3-dimethylnaphthalene    | 25.3 |
| 1,4-dimethylnaphthalene    | 25.6 |
| 1,5-dimethylnaphthalene    | 25.7 |
| 1,6-dimethylnaphthalene    | 25.8 |
| 1,7-dimethylnaphthalene    | 25   |
| 1,8-dimethylnaphthalene    | 25.2 |
| 2,3-dimethylnaphthalene    | 24.8 |
| 2,6-dimethylnaphthalene    | 25.7 |
| 2,7-dimethylnaphthalene    | 25.7 |
| 1,4,5-trimethylnaphthalene | 29.7 |
| 1,4,6-trimethylnaphthalene | 28.7 |
| 2,3,5-trimethylnaphthalene | 28.1 |
| 2,3,6-trimethylnaphthalene | 28.2 |
| indane                     | 20.1 |
| acenaphthene               | 23.7 |
| fluorene                   | 25.5 |
| anthracene                 | 25.9 |
| phenanthrene               | 27.6 |
| fluoranthene               | 30.8 |
| pyrene                     | 30.4 |
| coronene                   | 37.4 |
| fluorobenzene              | 12.6 |
| 1,2-difluorobenzene        | 13.5 |
| 1,2,3-trifluorobenzene     | 14.5 |
| 1,2,4-trifluorobenzene     | 13.8 |

|                                   |      |
|-----------------------------------|------|
| 1,3,5-trifluorobenzene            | 16.1 |
| 4-fluorotoluene                   | 15.7 |
| 1,3,5-tri(trifluoromethyl)benzene | 29.6 |
| perfluorotoluene                  | 21.3 |
| 2,3,4,5,6-pentafluorotoluene      | 19.4 |
| benzotrifluoride                  | 15.5 |
| 2-fluorobiphenyl                  | 24.4 |
| chlorobenzene                     | 16.2 |
| 1,2-dichlorobenzene               | 20.1 |
| 1,3-dichlorobenzene               | 21.1 |
| 1,4-dichlorobenzene               | 21.1 |
| 1,2,3-trichlorobenzene            | 25.7 |
| 1,2,4-trichlorobenzene            | 25.3 |
| 1,3,5-trichlorobenzene            | 25.6 |
| 1,2,3,4-tetrachlorobenzene        | 29.6 |
| 1,2,3,5-tetrachlorobenzene        | 27   |
| 1,2,4,5-tetrachlorobenzene        | 28.2 |
| pentachlorobenzene                | 30.9 |
| hexachlorobenzene                 | 33.6 |
| 2-chlorotoluene                   | 19.0 |
| 2,4,5-trichlorotoluene            | 28.8 |
| 3,4,5-trichlorotoluene            | 27.7 |
| 2-chlorobiphenyl                  | 27.3 |
| 3-chlorobiphenyl                  | 28.2 |
| 4-chlorobiphenyl                  | 28.1 |
| 2,2'-dichlorobiphenyl             | 29.5 |
| 2,3-dichlorobiphenyl              | 30.3 |
| 2,3'-dichlorobiphenyl             | 30.4 |
| 2,4-dichlorobiphenyl              | 30.2 |
| 2,4'-dichlorobiphenyl             | 30.3 |
| 2,5-dichlorobiphenyl              | 30.3 |
| 3,3'-dichlorobiphenyl             | 31.2 |
| 3,4-dichlorobiphenyl              | 31.1 |
| 3,4'-dichlorobiphenyl             | 31.2 |
| 3,5-dichlorobiphenyl              | 30.7 |
| 4,4'-dichlorobiphenyl             | 31.1 |
| 2,2',3-trichlorobiphenyl          | 32.7 |
| 2,2',4-trichlorobiphenyl          | 32.7 |
| 2,2',5-trichlorobiphenyl          | 32.7 |
| 2,2',6-trichlorobiphenyl          | 32.6 |
| 2,3,3'-trichlorobiphenyl          | 33.6 |
| 2,3,4-trichlorobiphenyl           | 33.6 |
| 2,3,5-trichlorobiphenyl           | 33.6 |
| 2,3,6-trichlorobiphenyl           | 32.7 |
| 2,3',4-trichlorobiphenyl          | 33.5 |
| 2,3',5-trichlorobiphenyl          | 33.6 |

|                               |      |
|-------------------------------|------|
| 2,3',6-trichlorobiphenyl      | 32.8 |
| 2,4,4'-trichlorobiphenyl      | 33.5 |
| 2,4,5-trichlorobiphenyl       | 33.5 |
| 2,4,6-trichlorobiphenyl       | 32.1 |
| 2,4',5-trichlorobiphenyl      | 33.5 |
| 2,4'6-trichlorobiphenyl       | 32.7 |
| 2',3,4-trichlorobiphenyl      | 33.5 |
| 2',3,5-trichlorobiphenyl      | 33.6 |
| 3,3',4-trichlorobiphenyl      | 34.4 |
| 3,3',5-trichlorobiphenyl      | 34.4 |
| 3,4,4'-trichlorobiphenyl      | 34.4 |
| 3,4,5-trichlorobiphenyl       | 34.4 |
| 3,4'5-trichlorobiphenyl       | 33.9 |
| 2,2',3,3'tetrachlorobiphenyl  | 35.8 |
| 2,2',3,4-tetrachlorobiphenyl  | 35.8 |
| 2,2',3,4'-tetrachlorobiphenyl | 35.7 |
| 2,2',3,5-tetrachlorobiphenyl  | 35.8 |
| 2,2'3,5'-tetrachlorobiphenyl  | 35.8 |
| 2,2',3,6-tetrachlorobiphenyl  | 35.7 |
| 2,2',3,6'-tetrachlorobiphenyl | 35.7 |
| 2,2',4,4'-tetrachlorobiphenyl | 35.7 |
| 2,2',4,5-tetrachlorobiphenyl  | 35.7 |
| 2,2',4,5'-tetrachlorobiphenyl | 35.8 |
| 2,2',4,6-tetrachlorobiphenyl  | 35.1 |
| 2,2',4,6'-tetrachlorobiphenyl | 35.6 |
| 2,2',5,5'-tetrachlorobiphenyl | 35.8 |
| 2,2',5,6'-tetrachlorobiphenyl | 35.7 |
| 2,2',6,6'-tetrachlorobiphenyl | 35.5 |
| 2,3,3',4-tetrachlorobiphenyl  | 36.6 |
| 2,3,3',4'-tetrachlorobiphenyl | 36.6 |
| 2,3,3',5-tetrachlorobiphenyl  | 36.6 |
| 2,3,3',5'-tetrachlorobiphenyl | 36.6 |
| 2,3,3',6-tetrachlorobiphenyl  | 35.8 |
| 2,3,4,4'-tetrachlorobiphenyl  | 36.6 |
| 2,3,4,5-tetrachlorobiphenyl   | 36.6 |
| 2,3,4,6-tetrachlorobiphenyl   | 35.8 |
| 2,3,4',5-tetrachlorobiphenyl  | 36.6 |
| 2,3,4',6-tetrachlorobiphenyl  | 35.8 |
| 2,3,5,6-tetrachlorobiphenyl   | 35.4 |
| 2,3',4,4'-tetrachlorobiphenyl | 36.6 |
| 2,3',4,5'-tetrachlorobiphenyl | 36.6 |
| 2,3',4,6-tetrachlorobiphenyl  | 35.8 |
| 2,3',4',5-tetrachlorobiphenyl | 36.5 |
| 2,3',4',6-tetrachlorobiphenyl | 35.8 |
| 2,3',5,5'-tetrachlorobiphenyl | 36.6 |
| 2,3'5'6-tetrachlorobiphenyl   | 35.8 |

|                                 |      |
|---------------------------------|------|
| 2,4,4',6-tetrachlorobiphenyl    | 35.7 |
| 2',3,4,5-tetrachlorobiphenyl    | 36.6 |
| 3,3',4,4'-tetrachlorobiphenyl   | 37.4 |
| 3,3',4,5-tetrachlorobiphenyl    | 37.4 |
| 3,3',4,5'-tetrachlorobiphenyl   | 37.4 |
| 3,3',5,5'-tetrachlorobiphenyl   | 37.1 |
| 3,4,4',5-tetrachlorobiphenyl    | 37.4 |
| 2,2',3,3',4-pentachlorobiphenyl | 38.8 |
| 2,2',3,3',5-pentachlorobiphenyl | 38.8 |
| 2,2',3,3',6-pentachlorobiphenyl | 38.7 |
| 2,2',3,4,4'-pentachlorobiphenyl | 38.7 |
| 2,2',3,4,5-pentachlorobiphenyl  | 38.8 |
| 2,2',3,4,5'-pentachlorobiphenyl | 38.7 |
| 2,2',3,4,6-pentachlorobiphenyl  | 38.7 |
| 2,2',3,4,6'-pentachlorobiphenyl | 38.7 |
| 2,2',3,4',5-pentachlorobiphenyl | 38.8 |
| 2,2',3,4',6-pentachlorobiphenyl | 38.6 |
| 2,2',3,5,5'-pentachlorobiphenyl | 38.8 |
| 2,2',3,5,6-pentachlorobiphenyl  | 38.7 |
| 2,2',3,5,6'-pentachlorobiphenyl | 38.7 |
| 2,2',3,5',6-pentachlorobiphenyl | 38.7 |
| 2,2',3,6,6'-pentachlorobiphenyl | 38.6 |
| 2,2',3',4,5-pentachlorobiphenyl | 38.7 |
| 2,2',3',4,6-pentachlorobiphenyl | 38.7 |
| 2,2',4,4',5-pentachlorobiphenyl | 38.7 |
| 2,2',4,4',6-pentachlorobiphenyl | 38.6 |
| 2,2',4,5,5'-pentachlorobiphenyl | 38.8 |
| 2,2',4,5,6'-pentachlorobiphenyl | 38.6 |
| 2,2',4,5',6-pentachlorobiphenyl | 38.7 |
| 2,2',4,6,6'-pentachlorobiphenyl | 38.5 |
| 2,3,3',4,4'-pentachlorobiphenyl | 39.5 |
| 2,3,3',4,5-pentachlorobiphenyl  | 39.7 |
| 2,3,3',4',5-pentachlorobiphenyl | 39.6 |
| 2,3,3',4,5'-pentachlorobiphenyl | 39.5 |
| 2,3,3',4',6-pentachlorobiphenyl | 38.7 |
| 2,3,3',5,5'-pentachlorobiphenyl | 39.7 |
| 2,3,3',5,6-pentachlorobiphenyl  | 38.8 |
| 2,3,3',5',6-pentachlorobiphenyl | 38.8 |
| 2,3,4,4',5-pentachlorobiphenyl  | 39.6 |
| 2,3,4,4',6-pentachlorobiphenyl  | 38.7 |
| 2,3,4,5,6-pentachlorobiphenyl   | 38.8 |
| 2,3,4',5,6-pentachlorobiphenyl  | 37.8 |
| 2,3',4,4',5-pentachlorobiphenyl | 39.6 |
| 2,3',4,4',6-pentachlorobiphenyl | 38.7 |
| 2,3',4,5,5'-pentachlorobiphenyl | 39.6 |
| 2,3',4,5',6-pentachlorobiphenyl | 38.7 |

|                                   |      |
|-----------------------------------|------|
| 2',3,3',4,5-pentachlorobiphenyl   | 39.6 |
| 2',3,4,4',5-pentachlorobiphenyl   | 39.5 |
| 2',3,4,5,5'-pentachlorobiphenyl   | 39.7 |
| 2',3,4,5,6'-pentachlorobiphenyl   | 38.7 |
| 3,3',4,4',5-pentachlorobiphenyl   | 40.5 |
| 3,3',4,5,5'-pentachlorobiphenyl   | 40.5 |
| 2,2',3,3',4,4'-hexachlorobiphenyl | 41.8 |
| 2,2',3,3',4,5-hexachlorobiphenyl  | 41.8 |
| 2,2',3,3',4,5'-hexachlorobiphenyl | 41.8 |
| 2,2',3,3',4,6-hexachlorobiphenyl  | 41.6 |
| 2,2',3,3',4,6'-hexachlorobiphenyl | 41.7 |
| 2,2',3,3',5,5'-hexachlorobiphenyl | 41.8 |
| 2,2',3,3',5,6-hexachlorobiphenyl  | 41.7 |
| 2,2',3,3',5,6'-hexachlorobiphenyl | 41.7 |
| 2,2',3,3',6,6'-hexachlorobiphenyl | 41.6 |
| 2,2',3,4,4',5-hexachlorobiphenyl  | 41.8 |
| 2,2',3,4,4',5'-hexachlorobiphenyl | 41.8 |
| 2,2',3,4,4',6-hexachlorobiphenyl  | 40.8 |
| 2,2',3,4,4',6'-hexachlorobiphenyl | 41.8 |
| 2,2',3,4,5,5'-hexachlorobiphenyl  | 41.8 |
| 2,2',3,4,5,6-hexachlorobiphenyl   | 41.7 |
| 2,2',3,4,5,6'-hexachlorobiphenyl  | 41.7 |
| 2,2',3,4,5',6-hexachlorobiphenyl  | 41.6 |
| 2,2',3,4,6,6'-hexachlorobiphenyl  | 41.6 |
| 2,2',3,4',5,5'-hexachlorobiphenyl | 41.8 |
| 2,2',3,4',5,6-hexachlorobiphenyl  | 41.6 |
| 2,2',3,4',5',6-hexachlorobiphenyl | 41.6 |
| 2,2',3,4',6,6'-hexachlorobiphenyl | 41.6 |
| 2,2',3,5,5',6-hexachlorobiphenyl  | 41.7 |
| 2,2',3,5,6,6'-hexachlorobiphenyl  | 41.6 |
| 2,2',4,4',5,5'-hexachlorobiphenyl | 41.8 |
| 2,2',4,4',5,6'-hexachlorobiphenyl | 41.6 |
| 2,2',4,4',6,6'-hexachlorobiphenyl | 41.5 |
| 2,3,3',4,4',5-hexachlorobiphenyl  | 42.6 |
| 2,3,3',4,4',5'-hexachlorobiphenyl | 42.6 |
| 2,3,3',4,4',6-hexachlorobiphenyl  | 41.7 |
| 2,3,3',4,5,5'-hexachlorobiphenyl  | 42.6 |
| 2,3,3',4,5,6-hexachlorobiphenyl   | 41.8 |
| 2,3,3',4,5',6-hexachlorobiphenyl  | 41.8 |
| 2,3,3',4',5,5'-hexachlorobiphenyl | 42.6 |
| 2,3,3',4',5,6-hexachlorobiphenyl  | 41.8 |
| 2,3,3',4',5',6-hexachlorobiphenyl | 41.8 |
| 2,3,3',5,5',6-hexachlorobiphenyl  | 41.4 |
| 2,3,4,4',5,6-hexachlorobiphenyl   | 40.7 |
| 2,3',4,4',5,5'-hexachlorobiphenyl | 42.6 |
| 2,3',4,4',5',6-hexachlorobiphenyl | 41.8 |

|                                          |      |
|------------------------------------------|------|
| 3,3',4,4',5,5'-hexachlorobiphenyl        | 43.4 |
| 2,2',3,3',4,4',5-heptachlorobiphenyl     | 44.8 |
| 2,2',3,3',4,4',6-heptachlorobiphenyl     | 44.7 |
| 2,2',3,3',4,5,5'-heptachlorobiphenyl     | 44.8 |
| 2,2',3,3',4,5,6-heptachlorobiphenyl      | 44.7 |
| 2,2',3,3',4,5,6'-heptachlorobiphenyl     | 44.7 |
| 2,2',3,3',4,5',6-heptachlorobiphenyl     | 44.7 |
| 2,2',3,3',4,6,6'-heptachlorobiphenyl     | 44.7 |
| 2,2',3,3',4',5,6-heptachlorobiphenyl     | 44.6 |
| 2,2',3,3',5,5',6-heptachlorobiphenyl     | 44.7 |
| 2,2',3,3',5,6,6'-heptachlorobiphenyl     | 44.7 |
| 2,2',3,4,4',5,5'-heptachlorobiphenyl     | 44.7 |
| 2,2',3,4,4',5,6-heptachlorobiphenyl      | 44.7 |
| 2,2',3,4,4',5,6'-heptachlorobiphenyl     | 44.7 |
| 2,2',3,4,4',5',6-heptachlorobiphenyl     | 44.7 |
| 2,2',3,4,4',6,6'-heptachlorobiphenyl     | 44.6 |
| 2,2',3,4,5,5',6'-heptachlorobiphenyl     | 44.7 |
| 2,2',3,4,5,6,6'-heptachlorobiphenyl      | 44.6 |
| 2,2',3,4',5,5',6-heptachlorobiphenyl     | 44.7 |
| 2,2',3,4',5,6,6'-heptachlorobiphenyl     | 44.6 |
| 2,3,3',4,4',5,5'-heptachlorobiphenyl     | 45.6 |
| 2,3,3',4,4',5,6-heptachlorobiphenyl      | 44.7 |
| 2,3,3',4,4',5',6-heptachlorobiphenyl     | 44.8 |
| 2,3,3',4,5,5',6-heptachlorobiphenyl      | 44.8 |
| 2,3,3',4',5,5',6-heptachlorobiphenyl     | 44.8 |
| 2,2',3,3',4,4',5,5'-octachlorobiphenyl   | 48.1 |
| 2,2',3,3',4,4',5,6-octachlorobiphenyl    | 48.0 |
| 2,2',3,3',4,4',5,6'-octachlorobiphenyl   | 48.0 |
| 2,2',3,3',4,4',6,6'-octachlorobiphenyl   | 47.8 |
| 2,2',3,3',4,5,5',6-octachlorobiphenyl    | 48.0 |
| 2,2',3,3',4,5,5',6'-octachlorobiphenyl   | 48.0 |
| 2,2',3,3',4,5,6,6'-octachlorobiphenyl    | 47.9 |
| 2,2',3,3',4,5',6,6'-octachlorobiphenyl   | 46.4 |
| 2,2',3,3',5,5',6,6'-octachlorobiphenyl   | 47.9 |
| 2,2',3,4,4',5,5',6-octachlorobiphenyl    | 48.1 |
| 2,2',3,4,4',5,6,6'-octachlorobiphenyl    | 48.2 |
| 2,3,3',4,4',5,5',6-octachlorobiphenyl    | 48.1 |
| 2,2',3,3',4,4',5,5',6-nonachlorobiphenyl | 51   |
| 2,2',3,3',4,4',5,6,6'-nonachlorobiphenyl | 50.8 |
| 2,2',3,3',4,5,5',6,6'-nonachlorobiphenyl | 50.9 |
| decachlorobiphenyl                       | 53.9 |
| 1,1,1-trichloro-2,2-(4-clc6h4)ethane     | 38.1 |
| 1,1-dichloro-2,2-(4-clc6h4)ethene        | 39.7 |
| 1,1-dichloro-2,2-(4-clc6h4)ethane        | 35.2 |
| 1-chloronaphthalene                      | 21.9 |
| 2-chloronaphthalene                      | 21.5 |

|                                  |      |
|----------------------------------|------|
| 1,2-dichloronaphthalene          | 27.1 |
| 1,3-dichloronaphthalene          | 27.4 |
| 1,4-dichloronaphthalene          | 27.7 |
| 1,5-dichloronaphthalene          | 27.8 |
| 1,6-dichloronaphthalene          | 28   |
| 1,7-dichloronaphthalene          | 27.9 |
| 1,8-dichloronaphthalene          | 28.7 |
| bromobenzene                     | 16.9 |
| 1,4-dibromobenzene               | 23.7 |
| 1,3,5-tribromobenzene            | 28   |
| 4-bromotoluene                   | 20.4 |
| 2-bromonaphthalene               | 24.1 |
| 4-bromo-p-terphenyl              | 39.9 |
| iodobenzene                      | 18.4 |
| 4-iodotoluene                    | 21.1 |
| 4-iodoethylbenzene               | 26.1 |
| o-fluorochlorobenzene            | 16.7 |
| m-fluorochlorobenzene            | 16.4 |
| p-fluorochlorobenzene            | 16.7 |
| o-fluoriodobenzene               | 19.9 |
| m-fluoriodobenzene               | 19.8 |
| p-fluoriodobenzene               | 19.2 |
| 4-chlorobenzotrifluoride         | 23.4 |
| methylphenylether                | 11.9 |
| ethylphenylether                 | 14.9 |
| 4-propylanisole                  | 20.9 |
| 2,4,6-tribromoanisole            | 26.0 |
| diphenylether                    | 3.3  |
| 4-chlorodiphenylether            | 29.9 |
| 4-bromodiphenylether             | 30.3 |
| 1,3-dimethoxybenzene             | 10.0 |
| 1,4-dimethoxybenzene             | 8.7  |
| tetrachloro-1,4-dimethoxybenzene | 24.5 |
| styrene oxide                    | 6.3  |
| benzaldehyde                     | 6.0  |
| 4-methylbenzaldehyde             | 8.3  |
| 2,5-dimethylbenzaldehyde         | 12.4 |
| 2-methoxybenzaldehyde            | 5.1  |
| cinnamaldehyde                   | 6.3  |
| 2,6-dichlorobenzaldehyde         | 16.9 |
| phenylacetaldehyde               | 6.7  |
| acetophenone                     | 6.5  |
| 4-methylacetophenone             | 9.3  |
| 4-methoxyacetophenone            | 15.5 |
| benzylmethylketone               | 3.5  |
| benzoylacetone                   | 11.2 |



|                                      |       |
|--------------------------------------|-------|
| 1,1,1-trifluorobenzoylacetone        | 9.9   |
| benzil                               | 15.6  |
| anthraquinone                        | 16.7  |
| 2-methylanthraquinone                | 19.4  |
| phenanthraquinone                    | 8.4   |
| 9-fluorenone                         | 18.7  |
| methadone                            | 13.3  |
| mitoxantrone                         | -41.1 |
| 1-chloroanthraquinone                | 17.9  |
| 7-hydroxyflavone                     | 3.8   |
| 4',5,7-trihydroxyflavone             | -20.9 |
| 2',3,4',5,7-pentahydroxyflavone      | -46.1 |
| 3',5,7-trihydroxy-4'-methoxyflavone  | -12.7 |
| 5,7-dihydroxy-4'-methoxyflavone      | -5.6  |
| 3',4',5,7-tetrahydroxyflavone        | -27.2 |
| 2,3-dihydro-4',5,7-trihydroxyflavone | -19.5 |
| 3,3',4',5,5',7-hexahydroxyflavone    | -51.8 |
| rutin                                | -91.2 |
| naringin                             | -73.0 |
| 3,3',4',5,7-pentahydroxyflavone      | -36.6 |
| catechin                             | -56   |
| epicatechin                          | -59.6 |
| hesperidin                           | 0.0   |
| methyl benzoate                      | 10.4  |
| ethyl benzoate                       | 13.7  |
| methyl 4-dimethylaminobenzoate       | 10.6  |
| methyl 3-nitrobenzoate               | 6.4   |
| methyl 4-nitrobenzoate               | 6.8   |
| methyl 4-bromobenzoate               | 15.3  |
| methyl 4-iodobenzoate                | 16.8  |
| methyl 3,4-dichlorobenzoate          | 18.7  |
| methyl 3,5-dinitrobenzoate           | 4.7   |
| methyl 2-nitro-4-chlorobenzoate      | 9.1   |
| methyl 3-nitro-4-chlorobenzoate      | 9.5   |
| phenyl acetate                       | 2.9   |
| diphenyl carbonate                   | 15.5  |
| dimethyl phthalate                   | 2.6   |
| diethyl phthalate                    | 6.2   |
| dibutyl phthalate                    | 23.0  |
| benzotrile                           | 5.4   |
| 4-methoxybenzotrile                  | 5.5   |
| phenylacetotrile                     | 5.3   |
| 1,2-dicyanobenzene                   | 0.0   |
| 1,3-dicyanobenzene                   | -1.5  |
| 1,4-dicyanobenzene                   | -0.4  |
| 2,6-dichlorobenzotrile               | 14.3  |

|                             |       |
|-----------------------------|-------|
| aniline                     | -2.1  |
| o-toluidine                 | 2.2   |
| p-toluidine                 | 2.1   |
| 4-ethylaniline              | 4.9   |
| 4-propylaniline             | 8.7   |
| 4-isopropylaniline          | 6.8   |
| 4-butyylaniline             | 11    |
| 2-chloroaniline             | 6.1   |
| 3-chloroaniline             | 3.7   |
| 4-chloroaniline             | 3.2   |
| 4-bromoaniline              | 4.5   |
| 2-methoxyaniline            | 1.9   |
| 3-methoxyaniline            | -1.9  |
| 4-methoxyaniline            | -3    |
| 2-nitroaniline              | 1.3   |
| 3-nitroaniline              | -3.5  |
| 4-nitroaniline              | -6.5  |
| 3-aminoacetophenone         | -2.2  |
| 4-aminoacetophenone         | 0.6   |
| methyl 4-aminobenzoate      | -3.4  |
| ethyl 4-aminobenzoate       | 0.6   |
| propyl 4-aminobenzoate      | 3.9   |
| isopropyl 4-aminobenzoate   | 2.6   |
| butyl 4-aminobenzoate       | 6.8   |
| isobutyl 4-aminobenzoate    | 6.4   |
| pentyl 4-aminobenzoate      | 11.8  |
| o-phenylenediamine          | -9.7  |
| m-phenylenediamine          | -14.3 |
| 3,5-dinitroaniline          | -2.5  |
| 2-methyl-3,5-dinitroaniline | -1.4  |
| 4-methyl-3,5-dinitroaniline | -1.7  |
| 2,4-dimethylaniline         | 4.3   |
| 2,6-dimethylaniline         | 7.3   |
| 3,4-dimethylaniline         | 4.6   |
| 4-pentylaniline             | 15    |
| 4-hexylaniline              | 18.7  |
| n-methylaniline             | 5.9   |
| n,n-dimethylaniline         | 12.4  |
| n,n-diethylaniline          | 16.6  |
| 1-naphthylamine             | 6.6   |
| 2-naphthylamine             | 6.6   |
| di(4-aminophenyl)methane    | -9.7  |
| 4,4'-diaminobiphenyl        | -6.8  |
| 3,4-dichloroaniline         | 6.6   |
| 2,4,5-trichloroaniline      | 14.7  |
| phenylazide                 | 14.6  |

|                                         |       |
|-----------------------------------------|-------|
| azobenzene                              | 20.5  |
| trans-3,3',4,4'-tetrachloroazobenzene   | 38.5  |
| nitrobenzene                            | 8.8   |
| 2-nitrotoluene                          | 12.8  |
| 3-nitrotoluene                          | 14.7  |
| 4-nitrotoluene                          | 13.1  |
| 1-chloro-2-nitrobenzene                 | 11.5  |
| 4-nitroanisole                          | 8.0   |
| 4-(chloromethyl)nitrobenzene            | 11.6  |
| 1,2-dinitrobenzene                      | 4.6   |
| 1,3-dinitrobenzene                      | 4.1   |
| 1,4-dinitrobenzene                      | 3.6   |
| 2,4-dinitrotoluene                      | 6.7   |
| 2,6-dinitrotoluene                      | 8.1   |
| 3,4-dinitrotoluene                      | 7.8   |
| 1-nitronaphthalene                      | 16.9  |
| 2-nitronaphthalene                      | 18.5  |
| 3-nitrobiphenyl                         | 20.5  |
| benzamide                               | -13.1 |
| n-methylbenzamide                       | -9.0  |
| n-ethylbenzamide                        | -5.5  |
| n,n-dimethylbenzamide                   | -5.0  |
| n,n-diethyl-4-methylbenzamide           | 5.9   |
| 1-naphthaleneacetamide                  | -6.6  |
| diphenamid                              | 5.7   |
| acetanilide                             | -8.9  |
| n-methylacetanilide                     | -2.3  |
| 4-methoxyacetanilide                    | -10.6 |
| 4-ethoxyacetanilide                     | -6.3  |
| 2-(4-bromophenyl)-n,n-dimethylacetamide | 3.4   |
| lorcaimide                              | 0.0   |
| phthalimide                             | -7.9  |
| n-methylphthalimide                     | 2.9   |
| n-phenylurethane                        | 2.2   |
| salicylamide                            | -10.6 |
| benzoic acid                            | -2.5  |
| 2-methylbenzoic acid                    | 1.7   |
| 3-methylbenzoic acid                    | -0.9  |
| 4-methylbenzoic acid                    | -2.3  |
| 3,4-dimethylbenzoic acid                | 2.9   |
| 4-ethylbenzoic acid                     | 2.6   |
| 4-butylbenzoic acid                     | 8.4   |
| 2-fluorobenzoic acid                    | -6    |
| 3-fluorobenzoic acid                    | -1.8  |
| 4-fluorobenzoic acid                    | -1.8  |
| 2-chlorobenzoic acid                    | -3.8  |

|                                                 |       |
|-------------------------------------------------|-------|
| 3-chlorobenzoic acid                            | 0.3   |
| 4-chlorobenzoic acid                            | 0.9   |
| 2-bromobenzoic acid                             | -4.2  |
| 3-bromobenzoic acid                             | 2.1   |
| 4-bromobenzoic acid                             | 3.1   |
| 2-iodobenzoic acid                              | -3.8  |
| 4-iodobenzoic acid                              | 3.7   |
| 2-methoxybenzoic acid                           | -6.6  |
| 4-methoxybenzoic acid                           | -5.5  |
| 2-nitrobenzoic acid                             | -12.5 |
| 3-nitrobenzoic acid                             | -7.5  |
| 4-nitrobenzoic acid                             | -5.4  |
| 4-aminobenzoic acid                             | -20.0 |
| 4-n,n-dimethylaminobenzoic acid                 | -2.1  |
| 4-formylbenzoic acid                            | -6.2  |
| 3,5-dinitrobenzoic acid                         | -7.5  |
| 2,4-dichlorobenzoic acid                        | -0.7  |
| 3,4-dichlorobenzoic acid                        | 5.0   |
| 2-chloro-5-nitrobenzoic acid                    | -2.5  |
| 2,3-difluorobenzoic acid                        | -6.2  |
| 2,4-difluorobenzoic acid                        | -5.1  |
| 2,5-difluorobenzoic acid                        | -5.6  |
| 2,6-difluorobenzoic acid                        | -9.7  |
| 3,4-difluorobenzoic acid                        | -3    |
| 3,5-difluorobenzoic acid                        | -1.5  |
| acetylsalicylic acid                            | -13.1 |
| 4-aminosalicylic acid                           | -19.3 |
| 5-aminosalicylic acid                           | -18.8 |
| 5,6,7,8-tetrahydronaphthalene-1-carboxylic acid | 6.7   |
| 5,6,7,8-tetrahydronaphthalene-2-carboxylic acid | 6.6   |
| phenylacetic acid                               | -8.6  |
| 3-phenylpropanoic acid                          | -5.6  |
| 4-phenylbutanoic acid                           | -2.6  |
| flurbiprofen                                    | 5.9   |
| a-methyl-4-isobutylphenylacetic acid            | 9.8   |
| diclofenac                                      | 10.0  |
| ketoprofen                                      | 0.4   |
| phthalic acid                                   | -22.6 |
| isophthalic acid                                | -13   |
| trans-cinnamic acid                             | -2.2  |
| 3,4-dihydroxycinnamic acid                      | -27.2 |
| 1-naphthoic acid                                | 1.8   |
| 1-naphthylacetic acid                           | -1.5  |
| 3-methoxy-4-hydroxycinnamic acid                | -13.9 |
| 4-hydroxycinnamic acid                          | -14.3 |
| 3,5-dimethoxy-4-hydroxycinnamic acid            | -17.7 |

|                               |      |
|-------------------------------|------|
| tranilast                     | -3.1 |
| naproxen                      | 2.3  |
| phenol                        | -6.2 |
| 2-methylphenol                | -0.5 |
| 3-methylphenol                | -1.7 |
| 4-methylphenol                | -1.1 |
| 2,3-dimethylphenol            | 0.3  |
| 2,4-dimethylphenol            | 2.1  |
| 2,5-dimethylphenol            | 2.5  |
| 2,6-dimethylphenol            | 4.7  |
| 3,4-dimethylphenol            | 1.2  |
| 3,5-dimethylphenol            | 1.5  |
| 2,3,6-trimethylphenol         | 8.1  |
| 2,4,6-trimethylphenol         | 8.4  |
| 2-ethylphenol                 | 1.1  |
| 3-ethylphenol                 | 0.9  |
| 4-ethylphenol                 | 1.4  |
| 2-propylphenol                | 4.8  |
| 4-propylphenol                | 4.2  |
| 4-isopropylphenol             | 3.5  |
| 4-butylphenol                 | 7.6  |
| 2-sec-butylphenol             | 7.1  |
| 4-sec-butylphenol             | 6    |
| 2-tert-butylphenol            | 7.4  |
| 3-tert-butylphenol            | 6.6  |
| 4-tert-butylphenol            | 6.6  |
| 2-isopropyl-5-methylphenol    | 8.8  |
| 2-methyl-5-isopropylphenol    | 7.1  |
| 4-pentylphenol                | 12   |
| 4-tert-pentylphenol           | 8.6  |
| 2,6-diethylphenol             | 11.6 |
| 4-nonylphenol                 | 25.8 |
| 4-tert-octylphenol            | 20.2 |
| 2-benzylphenol                | 7.5  |
| 3-benzylphenol                | 7.0  |
| 4-benzylphenol                | 7.0  |
| 2-phenylphenol                | 5.1  |
| 3-phenylphenol                | 0.0  |
| 4-phenylphenol                | 0.0  |
| 2-allylphenol                 | 3.0  |
| 2-tert-butyl-6-methylphenol   | 9.8  |
| 2-tert-butyl-5-methylphenol   | 10.2 |
| 2-tert-butyl-4-methylphenol   | 10.2 |
| 1,2,3,4-tetrahydro-1-naphthol | 1.6  |
| 1,2,3,4-tetrahydro-2-naphthol | -0.9 |
| 2-fluorophenol                | -2.5 |

|                            |       |
|----------------------------|-------|
| 3-fluorophenol             | -4.2  |
| 4-fluorophenol             | -4.0  |
| 2-chlorophenol             | 4.8   |
| 3-chlorophenol             | -0.5  |
| 4-chlorophenol             | -2.2  |
| 2-bromophenol              | 6.2   |
| 3-bromophenol              | -0.1  |
| 4-bromophenol              | -0.5  |
| 2-iodophenol               | 2.3   |
| 3-iodophenol               | -0.9  |
| 4-iodophenol               | -0.5  |
| 2,3,5,6-tetrafluorophenol  | -3    |
| pentafluorophenol          | -2.5  |
| 2,3-dichlorophenol         | 7.2   |
| 2,4-dichlorophenol         | 7.1   |
| 2,5-dichlorophenol         | 7.4   |
| 2,6-dichlorophenol         | 8.0   |
| 3,4-dichlorophenol         | 0.3   |
| 3,5-dichlorophenol         | 2.2   |
| 2,4,5-trichlorophenol      | 8.0   |
| 2,4,6-trichlorophenol      | 11.6  |
| 3,4,5-trichlorophenol      | 5.8   |
| 2,4-dibromophenol          | 9.0   |
| 3,5-dibromophenol          | 5.5   |
| 2,4,6-tribromophenol       | 12.4  |
| 4-methyl-3,5-dibromophenol | 8.6   |
| 4-chloro-3-methylphenol    | 1.8   |
| 2-trifluoromethylphenol    | 2.1   |
| 3-trifluoromethylphenol    | 1.6   |
| 4-trifluoromethylphenol    | 1.9   |
| 2-methoxyphenol            | 2.1   |
| 3-methoxyphenol            | -5.7  |
| 4-methoxyphenol            | -7.9  |
| 2-hydroxybenzaldehyde      | 6.2   |
| 3-hydroxybenzaldehyde      | -10.9 |
| 4-hydroxybenzaldehyde      | -7.0  |
| 4-hydroxyacetophenone      | -12.8 |
| 3-cyanophenol              | -10.8 |
| 4-cyanophenol              | -11.6 |
| 2-aminophenol              | -14.1 |
| 3-aminophenol              | -19.2 |
| 4-aminophenol              | -20.0 |
| 2-nitrophenol              | 8.0   |
| 3-nitrophenol              | -7.8  |
| 4-nitrophenol              | -11.0 |
| 2,3-dinitrophenol          | -5.1  |

|                                 |       |
|---------------------------------|-------|
| 2,4-dinitrophenol               | 2.3   |
| 2,5-dinitrophenol               | 3.2   |
| 2,6-dinitrophenol               | -1.5  |
| 3,4-dinitrophenol               | -14.5 |
| 3,5-dinitrophenol               | -10.4 |
| 2,4,6-trinitrophenol            | -6.7  |
| 2-methyl-4,6-dinitrophenol      | 7.1   |
| 2-sec-butyl-4,6-dinitrophenol   | 13.9  |
| 2,4-dinitro-6-aminophenol       | -5.0  |
| 2,4-dinitroresorcinol           | -3.3  |
| 2-isopropyl-4,6-dinitrophenol   | 13.5  |
| 2,6-dichloro-4-nitrophenol      | 1.9   |
| 2-hydroxybenzoic acid           | -3.8  |
| 3-hydroxybenzoic acid           | -12.2 |
| 4-hydroxybenzoic acid           | -10.9 |
| 5-bromosalicylic acid           | 1.8   |
| catechol                        | -15.7 |
| resorcinol                      | -21.3 |
| hydroquinone                    | -23   |
| methyl 4-hydroxybenzoate        | -6.4  |
| ethyl 4-hydroxybenzoate         | -2.7  |
| propyl 4-hydroxybenzoate        | 1.0   |
| benzyl 4-hydroxybenzoate        | 1.7   |
| methyl 2-hydroxybenzoate        | 11.4  |
| methyl 3-hydroxybenzoate        | -6.0  |
| ethyl 2-hydroxybenzoate         | 14.0  |
| propyl 2-hydroxybenzoate        | 18.7  |
| butyl 2-hydroxybenzoate         | 22.6  |
| phenyl 2-hydroxybenzoate        | 13.5  |
| chlorohydroquinone              | -8.4  |
| 4-methyl-1,2-dihydroxybenzene   | -13.1 |
| capsaicin                       | -0.4  |
| 2-hydroxy-n-phenylbenzamide     | 4.7   |
| 2-hydroxybenzamide              | -10.2 |
| 4-hydroxy-3-methoxybenzaldehyde | -4.0  |
| 3-hydroxy-4-methoxybenzaldehyde | -5.0  |
| 2-hydroxy-3-methoxybenzaldehyde | 3.2   |
| 2-methoxy-4-allylphenol         | 4.5   |
| 2-methoxy-4-propenylphenol      | 9.4   |
| 3,4,5-trihydroxybenzoic acid    | -37.4 |
| 3-methoxy-4-hydroxybenzoic acid | -16.2 |
| 4-hydroxypropiophenone          | -8.5  |
| butyl 4-hydroxybenzoate         | 3.4   |
| 4-hydroxyacetanilide            | -25.5 |
| 2-amino-4-nitrosophenol         | -15.2 |
| 4-nitrosophenol                 | -7.1  |

|                                  |       |
|----------------------------------|-------|
| 2-methyl-4-nitrosophenol         | -3.4  |
| 1-naphthol                       | 2.3   |
| 2-naphthol                       | 1.4   |
| 3,4,5-tribromocatechol           | -11.2 |
| tetrabromocatechol               | -6.2  |
| 3-bromo-2-nitroso-1-naphthol     | 4.3   |
| 1,2,3-trihydroxybenzene          | -28.6 |
| 1,2,4-trihydroxybenzene          | -31.7 |
| 1,3,5-trihydroxybenzene          | -31.8 |
| dienestrol                       | -4.1  |
| hexestrol                        | 0.5   |
| diethylstilbestrol               | 0.4   |
| 4-allyl-2,6-dimethoxyphenol      | 3.3   |
| 2,3-dihydroxybenzoic acid        | -15.7 |
| 2,4-dihydroxybenzoic acid        | -16.1 |
| 2,5-dihydroxybenzoic acid        | -21.2 |
| 3,4-dihydroxybenzoic acid        | -23.9 |
| 3,5-dihydroxybenzoic acid        | -31.4 |
| isopropyl-4-formylphenoxyacetate | 3.1   |
| 2,6-dibromo-4-cyanophenol        | 3.5   |
| 3,5,3',5'-tetrabromobisphenola   | 24.7  |
| 1,3-dihydroxynaphthalene         | -15.6 |
| 1,5-dihydroxynaphthalene         | -13   |
| 1,7-dihydroxynaphthalene         | -14.4 |
| podophyllotoxin                  | -9.8  |
| methyl vanillate                 | 0.5   |
| rutin                            | -40.0 |
| 4,4'-isopropylidenediphenol      | -5.4  |
| dopamine                         | -28.1 |
| tetracycline                     | -59.7 |
| minocycline                      | -41.4 |
| doxorubicin                      | -44.3 |
| daunorubicin                     | -27   |
| clindamycin                      | -23.8 |
| zorubicin                        | -42.3 |
| mithramycin                      | -122  |
| benzyl alcohol                   | -5.0  |
| 4-methylbenzyl alcohol           | -3.7  |
| 2-hydroxybenzyl alcohol          | -14.2 |
| 2-(4-methylphenyl)-propan-2-ol   | -0.1  |
| 2-phenylethanol                  | -2.0  |
| 3-phenylpropan-1-ol              | 1.3   |
| 3-phenoxypropan-1-ol             | -1.3  |
| 2-benzyloxyethanol               | -6.0  |
| oxybutynin                       | 16.0  |
| neбиволol                        | 3.9   |



|                                  |       |
|----------------------------------|-------|
| bupranolol                       | 6.2   |
| f-isopropylbupranolol            | 0.8   |
| iodocyanopindolol                | -1.5  |
| pindolol                         | -1.4  |
| chloramphenicol                  | -18.7 |
| norephedrin                      | -11.7 |
| ephedrine                        | -4.2  |
| albuterol                        | 57.6  |
| f-isopropylpenbutalol            | 9.2   |
| tramadol, equatorial             | 9.2   |
| carazolol                        | 1.0   |
| esmolol                          | -3.6  |
| atenolol                         | -25.2 |
| labetalol                        | -14.4 |
| propranolol                      | 3.4   |
| thiophenol                       | 11.5  |
| phenylmethylsulfide              | 15.2  |
| methylphenylsulfoxide            | -8.3  |
| cyclohexylmethyl phenylsulfoxide | 7.1   |
| diphenylsulfoxide                | 4.1   |
| methylphenylsulfone              | -4.8  |
| diphenylsulfone                  | 6.8   |
| 4-methylsulfonylphenol           | -22.8 |
| phenylthiourea                   | -12.4 |
| benzenesulfonamide               | -16.9 |
| n-methylbenzenesulfonamide       | -6.6  |
| n,n-dimethylbenzenesulfonamide   | 0.7   |
| 1-(phenylsulfonyl)pyrrolidine    | 6.4   |
| 2-methylbenzenesulfonamide       | -13.0 |
| 3-methylbenzenesulfonamide       | -13.5 |
| 4-methylbenzenesulfonamide       | -13.6 |
| tolbutamide                      | -7.4  |
| furosemide                       | -19.1 |
| probenecid                       | -2.5  |
| bumetanide                       | -13.5 |
| hydrochlorothiazide              | -33.3 |
| sulfachlorpyridazine             | -24.5 |
| triphenylphosphine               | 30.4  |
| triphenylphosphineoxide          | 3.3   |
| triphenylphosphate               | 20.7  |
| tri-o-tolylphosphate             | 29.2  |
| tri-m-tolylphosphate             | 29.2  |
| tri-p-tolylphosphate             | 29.2  |
| fenchlorphos                     | 29.2  |
| isazofos                         | 9.6   |
| isofenphos                       | 15.6  |

|                                    |       |
|------------------------------------|-------|
| n,2,4,6-tetranitro-n-methylaniline | 0.7   |
| pentaerythritol tetranitrate       | 3.5   |
| glycerol trinitrate                | 3.3   |
| 2-propylfuran                      | 17.1  |
| 2-butylfuran                       | 20.6  |
| 2-pentylfuran                      | 24    |
| 2-hexylfuran                       | 27.2  |
| 2-heptylfuran                      | 30.8  |
| furan                              | 7.1   |
| 2-methylfuran                      | 10.6  |
| 2,5-dimethylfuran                  | 13.2  |
| 2-ethylfuran                       | 13.9  |
| furfuryl acetate                   | 1.8   |
| furfuryl alcohol                   | -10.5 |
| 2-furaldehyde                      | -2.9  |
| 5-methylfurfural                   | -0.6  |
| 2-acetylfuran                      | -2.2  |
| methyl 2-furoate                   | 1.7   |
| 5-hydroxymethyl-2-furaldehyde      | -18.3 |
| carbofuran                         | 1.4   |
| phthalan                           | 7.5   |
| cannabinol                         | 26.5  |
| d8tetrahydrocannabinol             | 29.4  |
| dibenzofuran                       | 24.5  |
| dihydrocoumarin                    | 4.5   |
| coumarin                           | 2.5   |
| maltol                             | -9.5  |
| phthalide                          | -1.1  |
| fluorescein                        | -18.1 |
| diacetylfluorescein                | 7.0   |
| warfarin                           | 0.2   |
| 6-methyl-4h-chromen-4-one          | 6.5   |
| 2-phenyl-4h-chromen-4-one          | 16.7  |
| 1,4-dihydro-3h-isochromen-3-one    | -1.1  |
| 1,3-benzodioxole                   | 10.6  |
| piperonal                          | 1.0   |
| xanthene                           | 26.5  |
| luteolin                           | -15.4 |
| 1,3-dioxolane                      | -6.3  |
| 2-methyl-1,3-dioxolane             | -4.2  |
| 2-ethyl-1,3-dioxolane              | -0.9  |
| 2,2-dimethyl-1,3-dioxolane         | -1.6  |
| 2-methyl-2-ethyl-1,3-dioxolane     | 2.1   |
| 4-methyl-1,3-dioxolane             | -4.2  |
| 4,5-dimethyl-1,3-dioxolane         | -1.4  |
| myristin                           | 12.2  |

|                             |       |
|-----------------------------|-------|
| 1,3-dioxepane               | -3.8  |
| paraldehyde                 | 0.2   |
| tropolone                   | -2.1  |
| 6-isopropyltropolone        | 6.4   |
| pyridine                    | -2.4  |
| 2-methylpyridine            | 0.1   |
| 3-methylpyridine            | 0.7   |
| 4-methylpyridine            | 0.1   |
| 2,3-dimethylpyridine        | 2.9   |
| 2,4-dimethylpyridine        | 2.5   |
| 2,5-dimethylpyridine        | 3.0   |
| 2,6-dimethylpyridine        | 2.2   |
| 3,4-dimethylpyridine        | 2.8   |
| 3,5-dimethylpyridine        | 3.8   |
| 2-ethylpyridine             | 3.8   |
| 3-ethylpyridine             | 4.1   |
| 4-ethylpyridine             | 3.7   |
| 2-methyl-5-ethylpyridine    | 8.5   |
| 2-chloropyridine            | 3.8   |
| 3-chloropyridine            | 4.8   |
| 2-bromopyridine             | 4.3   |
| 3-bromopyridine             | 6.8   |
| 2-methoxypyridine           | 5.1   |
| 2-acetylpyridine            | 0.2   |
| 3-acetylpyridine            | -6.7  |
| 4-acetylpyridine            | -5.3  |
| 2-cyanopyridine             | -3.2  |
| 3-cyanopyridine             | -4.5  |
| 4-cyanopyridine             | -2.2  |
| 3-formylpyridine            | -5.4  |
| 4-formylpyridine            | -3.1  |
| 2-aminopyridine             | -10.3 |
| 4-aminopyridine             | -11.6 |
| 2-n,n-dimethylaminopyridine | 5.0   |
| 4-nitropyridine             | -3.7  |
| 2-pyridinemethanol          | -11.5 |
| 2-pyridineethanol           | -11.4 |
| 2-pyridinepropanol          | -10.9 |
| 2-pyridinebutanol           | -9.5  |
| 2-pyridinepentanol          | -8.4  |
| phenazopyridine             | -4.7  |
| nicotine                    | 0.2   |
| chlorpheniramine            | 13    |
| brompheniramine             | 11.6  |
| zimeldine                   | 11.1  |
| cotinine                    | -13.2 |

|                                                |       |
|------------------------------------------------|-------|
| diantipyrylmethane                             | -8.5  |
| hexyldiantipyrylmethane                        | 5.8   |
| 1-benzylpyridin-2(1h)-one                      | 0.2   |
| 1-(3-chlorobenzyl)pyridin-2(1h)-one            | 5.2   |
| 1-[4-(trifluoromethyl)benzyl]pyridin-2(1h)-one | 8.1   |
| 1-(biphenyl-4-ylmethyl)pyridin-4(1h)-one       | 5.1   |
| 2,2'-bipyridine                                | 6.2   |
| nicotinic acid                                 | -23   |
| isoniazid                                      | -21.5 |
| amrinone                                       | -25.3 |
| nicardipine                                    | 10.4  |
| nimodipine                                     | 7.8   |
| niflumic acid                                  | -0.7  |
| 4-methylpyridine thiocyanate complex           | -17.5 |
| azocane                                        | 7.6   |
| 2-piperidineethanol                            | -11.5 |
| piperidine                                     | -3.7  |
| n-methylpiperidine                             | 2.7   |
| 2-methylpiperidine                             | 0.5   |
| 3-methylpiperidine                             | 0.4   |
| 4-methylpiperidine                             | 0.5   |
| cocaine                                        | 5.1   |
| atropine                                       | -5.5  |
| fentanyl                                       | 13.5  |
| haloperidol                                    | 8.7   |
| domperidone                                    | -1.5  |
| methylphenidate                                | -0.2  |
| n-methyl-2-pyridone                            | -13   |
| adenosine                                      | -42.7 |
| 1-methylquinolin-2(1h)-one                     | 2.4   |
| quinoline                                      | 7.2   |
| isoquinoline                                   | 9.6   |
| 8-hydroxyquinoline                             | 8.0   |
| 2-methyl-8-hydroxyquinoline                    | 10.6  |
| 4-methyl-8-hydroxyquinoline                    | 11.2  |
| 5-chloro-8-hydroxyquinoline                    | 14.4  |
| 5,7-dichloro-8-hydroxyquinoline                | 16.7  |
| 2-methyl-5,7-dichloro-8-hydroxyquinoline       | 19.5  |
| 5,7-dibromo-8-hydroxyquinoline                 | 19.3  |
| grepafloxacin                                  | -31.3 |
| quinine                                        | 1.8   |
| quinidine                                      | 1.8   |
| floxacin                                       | -32.3 |
| 1,5-naphthylridine                             | -2.2  |
| pyrrole                                        | -2.4  |
| 2-methylpyrrole                                | 0.0   |

|                                                    |       |
|----------------------------------------------------|-------|
| n-furfurylpyrrole                                  | 9.1   |
| 2-acetylpyrrole                                    | -6.6  |
| 2-pyrrolecarbaldehyde                              | -5.1  |
| methyl 2-pyrrolecarboxylate                        | -3.1  |
| inaperisone                                        | 18.4  |
| n-methyl-2-pyrrolidinone                           | -10.9 |
| n-benzyl-2-pyrrolidinone                           | -0.3  |
| n-trifluoroacetylindole                            | 18.3  |
| d-valerolactam                                     | -15.9 |
| n-methyl-d-valerolactam                            | -5.4  |
| indole                                             | -1.9  |
| 3-methylindole                                     | 11.2  |
| 6-chloroindole                                     | 8.3   |
| indomethacin                                       | 6.8   |
| carbazole                                          | 14.8  |
| tryptophan                                         | -41.2 |
| carbamazepine                                      | -5.5  |
| mianserin                                          | 17.9  |
| papaverine                                         | 13.0  |
| diphenhydramine                                    | 15.1  |
| 4-acetyl-1-phenyl-3-methyl-5-pyrazolone            | 5.5   |
| 4-propionyl-1-phenyl-3-methyl-5-pyrazolone         | 9.0   |
| 4-butanoyl-1-phenyl-3-methyl-5-pyrazolone          | 12.7  |
| 4-pentanoyl-1-phenyl-3-methyl-5-pyrazolone         | 16.3  |
| 4-hexanoyl-1-phenyl-3-methyl-5-pyrazolone          | 19.6  |
| 4-heptanoyl-1-phenyl-3-methyl-5-pyrazolone         | 23.4  |
| 4-octanoyl-1-phenyl-3-methyl-5-pyrazolone          | 27.0  |
| 4-nonanoyl-1-phenyl-3-methyl-5-pyrazolone          | 30.6  |
| 4-decanoyl-1-phenyl-3-methyl-5-pyrazolone          | 34.8  |
| 4-benzoyl-1-phenyl-3-methyl-5-pyrazolone           | 12.8  |
| imidazole                                          | -13.2 |
| n-methylimidazole                                  | -6.6  |
| 4-(2-aminoethyl)imidazole                          | -23.5 |
| dipyridamole                                       | -28.2 |
| 1-benzyl-1h-imidazole                              | 3.3   |
| 2-trifluoromethyl-5,6-dichlorobenzimidazole        | 12.6  |
| 2-trifluoromethyl-4,5,6,7-tetrachlorobenzimidazole | 21.4  |
| 2-trifluoromethylbenzimidazole                     | 5.0   |
| benzimidazole                                      | -13.6 |
| 1-methylbenzimidazole                              | -5.1  |
| 1,3-dimethyl-1,3-dihydro-2h-benzimidazol-2-one     | 2.9   |
| albendazole sulfoxide                              | -14.7 |
| pyrazine                                           | -6.3  |
| 2-methylpyrazine                                   | -4.1  |
| 2,3-dimethylpyrazine                               | -2    |
| 2,5-dimethylpyrazine                               | -1.3  |

|                                |       |
|--------------------------------|-------|
| trimethylpyrazine              | 0.2   |
| tetramethylpyrazine            | 1.6   |
| 2-ethylpyrazine                | -0.6  |
| 2,3-diethylpyrazine            | 4.0   |
| 2,5-diethylpyrazine            | 6.1   |
| 2-methyl-5-ethylpyrazine       | 2.5   |
| 2-isobutylpyrazine             | 6.8   |
| 2-methyl-3-isobutylpyrazine    | 6.8   |
| 2-fluoropyrazine               | -2.3  |
| 2-chloropyrazine               | 1.1   |
| 2-methoxypyrazine              | 1.0   |
| 2-ethoxypyrazine               | 4.1   |
| 2-propoxypyrazine              | 7.8   |
| 2-carbomethoxypyrazine         | -7.8  |
| 2-carbethoxypyrazine           | -4.8  |
| 2-acetylpyrazine               | -5.2  |
| 2-cyanopyrazine                | -4.8  |
| 2-vinylpyrazine                | -2.9  |
| quinoxaline                    | 3.1   |
| 1,10-phenanthroline            | 4.5   |
| 2-dimethylaminopyrimidine      | 1.7   |
| 5-dimethylaminopyrimidine      | -3.5  |
| pyrimidine                     | -8.6  |
| 2-methylpyrimidine             | -6.3  |
| 5-methylpyrimidine             | -5.8  |
| 2-fluoropyrimidine             | -3.9  |
| 5-fluoropyrimidine             | -4.9  |
| 2-chloropyrimidine             | -2.6  |
| 5-chloropyrimidine             | -2.0  |
| 2-bromopyrimidine              | -1.8  |
| 5-bromopyrimidine              | -0.5  |
| 2-methoxypyrimidine            | -4.3  |
| 2-ethoxypyrimidine             | -1.3  |
| 5-ethoxypyrimidine             | -2.3  |
| methyl 2-pyrimidinecarboxylate | -13.4 |
| methyl 5-pyrimidinecarboxylate | -7.0  |
| ethyl 2-pyrimidinecarboxylate  | -11.5 |
| quinazoline                    | 0.8   |
| 2-methylquinazolin-4(3h)-one   | -8.4  |
| ra12165                        | 6.4   |
| 2-n-methylaminopyrimidine      | -7.1  |
| 2-n-phenylaminopyrimidine      | -5.0  |
| 2-thiomethoxypyrimidine        | 1.2   |
| 2-cyanopyrimidine              | -5.1  |
| trimethoprim                   | -11.1 |
| 4-phenylpyrimidine             | 6.5   |

|                                        |       |
|----------------------------------------|-------|
| 1-methyl-1,3-dihydro-2h-indol-2-one    | 0.3   |
| 1-ethyl-1,3-dihydro-2h-indol-2-one     | 3.1   |
| 2-methyl-2,3-dihydro-1h-isoindol-1-one | -2.1  |
| riboflavin                             | -58   |
| lamivudine                             | -27.4 |
| cytosine                               | -31.8 |
| antipyrine                             | -11.3 |
| aminopyrine                            | -6.2  |
| piperazine                             | -23.2 |
| n-methylpiperazine                     | -16.8 |
| n,n-dimethylpiperazine                 | -10.3 |
| 2,5-dimethylpiperazine                 | -16.7 |
| hydroxyzine                            | 6.7   |
| quinuclidine                           | 3.9   |
| chlordiazepoxide                       | -1.8  |
| 2-hydroxybenzotriazole                 | -18.7 |
| benzotriazole                          | -11.6 |
| 1,2,4-triazole                         | -30.0 |
| flutriafol                             | 2.5   |
| tebuconazole                           | 8.6   |
| hexaconazole                           | 6.5   |
| 3-amino-1,2,4-triazole                 | -31.4 |
| azosemide                              | -29.4 |
| purine                                 | -24.6 |
| adenine                                | -28.4 |
| 6-chloropurine                         | -19.8 |
| methotrexate                           | -59.2 |
| didanosine                             | -33.4 |
| 2,4,5-trimethyloxazole                 | 3.9   |
| 2,5-diphenyl-1,3-oxazole               | 26.8  |
| benzoxazole                            | 5.5   |
| 2,1-benzisoxazole                      | 4.8   |
| morpholine                             | -11.2 |
| n-methylmorpholine                     | -7.8  |
| n-formylmorpholine                     | -15.1 |
| n-ethylmorpholine                      | -1.8  |
| scopolamine                            | -12.6 |
| uracil                                 | -22.5 |
| thymine                                | -19   |
| 1,3-dimethyluracil                     | -11.7 |
| bromacil                               | -1.5  |
| xanthine                               | -31.5 |
| theophylline                           | -21.5 |
| theobromine                            | -24.9 |
| caffeine                               | -11.8 |
| flumazenil                             | -6.8  |

|                                                       |       |
|-------------------------------------------------------|-------|
| guanine                                               | -34.6 |
| hypoxanthine                                          | -28.3 |
| acyclovir                                             | -40.4 |
| acycloviroacetyl                                      | -33.3 |
| acyclovirn2acetyl                                     | -40.8 |
| acyclovirnodiacetyl                                   | -34.2 |
| desciclovir                                           | -29.0 |
| descicloviroacetyl                                    | -22.3 |
| desciclovirnacetyl                                    | -36.6 |
| desciclovirnodiacetyl                                 | -31.1 |
| morphine                                              | -14.4 |
| codeine                                               | -9.9  |
| strychnine                                            | -0.9  |
| galantamine                                           | -14.1 |
| trazodone                                             | 6.0   |
| uridine                                               | 0.0   |
| oxycodone                                             | -20.5 |
| mdma                                                  | 5.3   |
| milnacipran                                           | -1.1  |
| nalbuphine                                            | -23.6 |
| phenylbutazone                                        | 14.2  |
| diazepam                                              | 10.2  |
| piroxicam                                             | 3.6   |
| tenoxicam                                             | -15.5 |
| oxazepam                                              | 0.9   |
| temazepam                                             | 2.7   |
| clotiazepam                                           | 0.0   |
| cefuroxime                                            | -39.9 |
| nevirapine                                            | -7.3  |
| thiophene                                             | 10.2  |
| 2-methylthiophen                                      | 13.1  |
| 2-formylthiophene                                     | 2.2   |
| 2-formyl-3-methylthiophene                            | 7.4   |
| dibenzothiophene                                      | 26.4  |
| thianthrene                                           | 25.9  |
| 1,1,1-trifluoro-4(2-thienyl)-4-mercaptobut-3-en-2-one | 17.5  |
| xylazine                                              | 11.4  |
| thiazole                                              | -2.5  |
| 2-acetylthiazole                                      | -1.2  |
| benzothiazole                                         | 7.9   |
| mercaptobenzothiazole                                 | 9.0   |
| nizatidine                                            | -24.1 |
| phenothiazine                                         | 17.1  |
| promazine                                             | 22.9  |
| chlorpromazine                                        | 28.1  |
| desmonomethylpromazine                                | 18.6  |



|                             |       |
|-----------------------------|-------|
| oxacillin                   | -14.0 |
| penicilling                 | -12.1 |
| nafcillin                   | -2.6  |
| cephalothin                 | -33.0 |
| cabenicillin                | -29   |
| piperacillin                | -39.7 |
| cloxacillin                 | -12.2 |
| dicloxacillin               | -9.2  |
| oxacillin                   | -14   |
| amoxicillin                 | -59.4 |
| floxacillin                 | -10.4 |
| ampicillin                  | -44.8 |
| cefazolin                   | -36.6 |
| cinoxacin                   | -15.6 |
| ciprofloxacin               | -39.5 |
| cephalexin                  | -50.1 |
| pipemidic acid              | -44.6 |
| enoxacin                    | -36.2 |
| lomefloxacin                | -35.4 |
| ofloxacin                   | -31   |
| pefloxacin                  | -25.5 |
| amiloride                   | -31.8 |
| amitriptyline               | 25.2  |
| physostigmine               | -3.0  |
| stobadine                   | 2.2   |
| skb2                        | -15.4 |
| skb7                        | 10.3  |
| skb8                        | 23.3  |
| skb19                       | -7.0  |
| skb20                       | -19.5 |
| skb24                       | -10   |
| skb26                       | 0.9   |
| skb30                       | -1.0  |
| skb31                       | 8.8   |
| skb34                       | 4.7   |
| skb36                       | 16    |
| skb41                       | 20.2  |
| 2-(2-dimethylamino)pyridine | -1.4  |
| 2-(2-aminoethyl)thiazole    | -10.2 |
| skf101468                   | 5.6   |
| 2-(2-methylamino)pyridine   | -7.0  |
| desipramine                 | 20.5  |
| progesterone                | 9.9   |
| hydrocortisone              | -22   |
| prednisolone                | -20.2 |
| cholesterol                 | 58.4  |

|                                       |       |
|---------------------------------------|-------|
| betulin                               | 30.2  |
| 11a-hydroxy-16a,17a-epoxyprogesterone | -3.6  |
| estrone                               | 1.4   |
| estratriol                            | -16.3 |
| digitoxin                             | -51.2 |
| cholesterol acetate                   | 67.6  |
| 11-b-methoxyestradiol                 | -13.3 |
| 11-b-ethylestradiol                   | 0.0   |
| 16a-fluoroestradiol                   | -3.4  |
| 16a-fluoro-11b-methoxyestradiol       | -15.2 |
| 16a-fluoro-11b-ethylestradiol         | 3.3   |
| 16a-fluoro-17a-ethynylestradiol       | 0.0   |
| norethisterone                        | -2.6  |
| etonogestrel                          | -2.5  |
| norgestrel                            | 1.0   |
| gestodene                             | -1.1  |
| ethinylestradiol                      | -6.8  |
| om08                                  | -21.3 |
| org34694                              | 0.7   |
| org36410                              | 8.4   |
| org30659                              | -6.6  |
| org4325                               | 0.0   |
| org4060                               | 2.8   |
| org32540                              | 0.0   |
| glucose                               | -57.4 |
| sucrose                               | -79.5 |
| jg-13                                 | -6.9  |
| jg-14                                 | -4.7  |
| jg-15                                 | -17.1 |
| jg-16                                 | -23.4 |
| jg-17                                 | 0.0   |
| atrazine                              | 3.9   |
| simazine                              | 0.4   |
| propazine                             | 7.2   |
| terbuthylazine                        | 9.9   |
| cyanazine                             | -4.3  |
| simetryn                              | 4.7   |
| ametryn                               | 8.6   |
| prometryn                             | 12.3  |
| terbutryn                             | 13.6  |
| dimethametryn                         | 17    |
| dipropetryn                           | 15.3  |
| aziprotryn                            | 10.8  |
| methoprotryn                          | 6     |
| atraton                               | 1.3   |
| terbumeton                            | 7.5   |

|                                                |       |
|------------------------------------------------|-------|
| secbumeton                                     | 4.3   |
| prometon                                       | 5.6   |
| chlorpropamide                                 | -5.5  |
| diflubenzuron                                  | 16.8  |
| hexaflumuron                                   | 22.1  |
| phenylurea                                     | -17.6 |
| 3-cf3-1-phenyl-3,3-dimethylurea                | -0.5  |
| m-chloro-1-phenyl-3,3-dimethylurea             | -3.2  |
| p-chloro-1-phenyl-3,3-dimethylurea             | -2.6  |
| 3,4-dichloro-1-phenyl-3,3-dimethylurea         | 0.5   |
| 3-me-4-chloro-1-phenyl-3,3-dimethylurea        | 2.2   |
| 3-chloro-4-methoxy-1-phenyl-3,3-dimethylurea   | -5.1  |
| 1-phenyl-1,3,3-trimethylurea                   | 1.4   |
| 1,3-diphenylthiourea                           | -1.9  |
| n-phenylbenzohydroxamic acid                   | 0.4   |
| n-phenyl-2-methylbenzohydroxamic acid          | 3     |
| n-m-tolylbenzohydroxamic acid                  | 3.6   |
| n-o-tolyl-2-methylbenzohydroxamic acid         | 6.8   |
| n-p-tolyl-2-methylbenzohydroxamic acid         | 6.1   |
| n-phenyl-4-ethoxybenzohydroxamic acid          | 2.7   |
| n-p-tolyl-4-ethoxybenzohydroxamic acid         | 7.4   |
| n-o-tolyl-4-chlorobenzohydroxamic acid         | 8.8   |
| n-m-chlorophenyl-4-methoxybenzohydroxamic acid | 4.1   |
| n-p-chlorophenyl-4-bromobenzohydroxamic acid   | 10.4  |
| n-m-chlorophenylbenzohydroxamic acid           | 6.1   |
| n-p-tolyl-phenoxyacetohydroxamic acid          | 2.5   |
| fccp                                           | 4.7   |
| cccp                                           | 4.1   |
| barbituric acid                                | -27.6 |
| 5-methyl-5-ethylbarbituric acid                | -19.7 |
| 5,5-diethylbarbituric acid                     | -13   |
| 5-ethyl-5-propylbarbituric acid                | -13.2 |
| 5-allyl-5-ethylbarbital                        | -15.2 |
| 5,5-diallylbarbital                            | -12.4 |
| 1,5-dimethyl-5-cyclohexenylbarbituric acid     | -2.7  |
| 5-ethyl-5-phenylbarbital                       | -13.5 |
| ftorafur                                       | -17.6 |
| thiopental                                     | 1.5   |
| phenoxyacetic acid                             | -11.1 |
| 2,4-dichlorophenoxyacetic acid                 | -5.5  |
| carbaryl                                       | 3.0   |
| fenoxycarb                                     | 17.6  |
| pirimicarb                                     | 3.0   |
| dimethirimol                                   | 3.5   |
| ethirimol                                      | -0.1  |
| bupirimate                                     | -4.0  |

|                                       |       |
|---------------------------------------|-------|
| cyprodinil                            | 18.4  |
| propachlor                            | 10.9  |
| acetochlor                            | 10.0  |
| metolachlor                           | 9.9   |
| flufenamic acid                       | 14.9  |
| isoxaben                              | 10.3  |
| metalaxyl                             | -0.7  |
| ethylfumesate                         | 7.5   |
| haloxyfop                             | -2.9  |
| amlodipine                            | -0.7  |
| zidovudine                            | -22.8 |
| azoxystrobin                          | 6.9   |
| kresoxim-methyl                       | 17.7  |
| 5,5-diphenylhydantoin                 | -11.3 |
| procainamide                          | -20.7 |
| procaine                              | -2.3  |
| lidocaine                             | 6.2   |
| ropivacaine                           | 1.7   |
| bupivacaine                           | 5.9   |
| prilocaine                            | -4.7  |
| tetracaine                            | 9.3   |
| chlorprocaine                         | 3.9   |
| rifampin                              | -71.7 |
| pyridine-n-oxide                      | -15.1 |
| 2,4,6-trimethylquinoline-1-oxide      | 3.1   |
| n,n-dimethyl-2-phenylethylamineoxide  | -12   |
| n,n-dimethyl-3-phenylpropylamineoxide | -10.9 |
| 2,2-difluoropropane                   | 6.4   |
| 1,1,2,2,3-pentafluoropropane          | 9.9   |
| 1,1,1,2,2-pentafluoropropane          | 11.5  |
| 1,1,2,2,3,3-hexafluoropropane         | 5.1   |
| 1,1,1,3,3,3-hexafluoropropane         | 9.6   |
| 1,1,1,2,2,3,3-heptafluoropropane      | 11.4  |
| 1,1,1,2,3,3,3-heptafluoropropane      | 12.3  |
| 1,1,2,3,4,4-hexafluorobutane          | 3.5   |
| 1,1,1,2,2,3,4,4-octafluorobutane      | 11.3  |
| 1,1,1,2,3,4,4,4-octafluorobutane      | 10.2  |
| 1,1,2,2,3,3,4,4-octafluorobutane      | 12.2  |
| bctc                                  | 7.6   |
| thiobctc                              | 18.9  |
| icilin                                | -5.1  |
| frescolatml                           | 11.4  |
| frescolatmga                          | 6.1   |
| ws3                                   | 6.7   |
| coolingagent10                        | -4.5  |
| pmd38                                 | -8.3  |

|                                  |      |
|----------------------------------|------|
| coolantp                         | 6.7  |
| ws23                             | -5.8 |
| hydroxycitronellal               | -8.6 |
| capsazepine                      | -5   |
| a-copaene                        | 37   |
| germacrene d                     | 41   |
| a-ylangene                       | 37.1 |
| a-cubebene                       | 36.7 |
| a-muurolene                      | 39.1 |
| a-farnesene                      | 37.5 |
| 1,8-cineole                      | 14.3 |
| geranial                         | 16   |
| camphor                          | 10.8 |
| b-ionone                         | 17.6 |
| dihydro-b-ionone                 | 20.8 |
| carveol                          | 4.3  |
| dihydrocarveol                   | 5.9  |
| linalool                         | 10.3 |
| hydroxycitronellal               | -4.2 |
| menthol                          | 12.0 |
| borneol                          | 7.5  |
| geranyl acetone                  | 18.3 |
| benzylamine                      | -1.5 |
| 2-phenylethylamine               | -3.6 |
| n,n-dimethyl-3-phenylpropylamine | 12.0 |
| 4-phenylbutylamine               | 6.0  |
| n-methylbenzylamine              | 1.5  |
| 4-methyl-n-methylbenzylamine     | 4.6  |
| 4-methyl-n-ethylbenzylamine      | 7.1  |
| 4-methyl-n-propylbenzylamine     | 10.8 |
| 4-methyl-n-butylbenzylamine      | 14.0 |
| 4-methyl-n-pentylbenzylamine     | 18.6 |
| 4-methyl-n-hexylbenzylamine      | 22.6 |
| 4-methyl-n-heptylbenzylamine     | 24.7 |
| deprenyl                         | 10.8 |
| 4-chloroamphetamine              | 5.7  |
| amphetamine                      | 2.9  |
| fluoxetine                       | 19.3 |
| verapamil                        | 5.9  |
| diphenylamine                    | 16.7 |
| ch3ocf2chclf                     | 9.4  |
| ch3ocf2chbrf                     | 11   |
| ch3ocf2chcl2                     | 11.5 |
| ch3ocf2cf2cf2cf3                 | 21.8 |
| ch3ocf2cf(cf3)2                  | 21.8 |
| ch2focf2chf2                     | 4.9  |

|                                                    |      |
|----------------------------------------------------|------|
| chf2och2cf3                                        | 7.0  |
| ch2fochfcf3                                        | 5.5  |
| ch2focf2ch(cf3)2                                   | 19.3 |
| cclf2och2cf3                                       | 15.7 |
| chf2ochclcf3                                       | 16.8 |
| chf2ocf2chclf                                      | 5.7  |
| chf2ochfcf3                                        | 8.3  |
| chf2ocf2cbrclf                                     | 20.3 |
| chf2ocbrclcf3                                      | 19.5 |
| cclf2ochfcf3                                       | 16.4 |
| chf2occlfcf3                                       | 16.0 |
| chf2ocf2cclf2                                      | 15.0 |
| cclf2ochclcf3                                      | 18.8 |
| chf2occl2cf3                                       | 18.1 |
| cclf2ocf2chclf                                     | 18.5 |
| chf2ocf2ccl2f                                      | 18.1 |
| chf2ocf2cf3                                        | 14.5 |
| cf3ochfcf3                                         | 13.9 |
| chf2oc(f)(chf2)cf3                                 | 12.7 |
| cclf2occlfcf3                                      | 23.9 |
| cclf2ocf2cclf2                                     | 24.6 |
| cclf2occl2cf3                                      | 26.3 |
| cclf2ocf2ccl2f                                     | 26.6 |
| ccl2focf2cclf2                                     | 26.7 |
| 2-difluoromethylperfluorooxolane                   | 16.0 |
| cis-2,5-bis(fluoromethyl)perfluorooxolane          | 12.7 |
| trans-2,5-bis(fluoromethyl)perfluorooxolane        | 13.5 |
| cis-2,5-bis(difluoromethyl)perfluorooxolane        | 16.5 |
| trans-2,5-bis(difluoromethyl)perfluorooxolane      | 17.2 |
| cis-3,4-difluoro-2,2-bis(trifluoromethyl)oxetane   | 12.0 |
| trans-3,4-difluoro-2,2-bis(trifluoromethyl)oxetane | 15.0 |
| 2,2,3-trifluoro-4,4-bis(trifluoromethyl)oxetane    | 18.3 |
| 2,2-difluoro-4,4-bis(trifluoromethyl)oxetane       | 16.3 |
| 3,3-difluoro-2,2-bis(trifluoromethyl)oxetane       | 16.3 |
| 4-fluoro-2,2-bis(trifluoromethyl)oxetane           | 12.1 |
| 3-fluoro-2,2-bis(trifluoromethyl)oxetane           | 12.0 |
| 2,2-bis(trifluoromethyl)oxetane                    | 11.2 |
| n-nitrosodimethylamine                             | -9.4 |
| n-nitrosodiethylamine                              | -2.3 |
| n-nitrosodipropylamine                             | 4.6  |
| n-nitrosodiisopropylamine                          | 3.7  |
| n-nitrosodibutylamine                              | 11.5 |
| n-nitrosodiisobutylamine                           | 10.7 |
| n-nitrosodipentylamine                             | 18.4 |
| n-nitrosomethylethylamine                          | -5.9 |
| n-nitrosomethylpropylamine                         | -2.2 |

|                                   |       |
|-----------------------------------|-------|
| n-nitrosomethylbutylamine         | 1.3   |
| n-nitrosomethylpentylamine        | 5.0   |
| n-nitrosoethylpropylamine         | 0.9   |
| n-nitrosoethylbutylamine          | 4.5   |
| n-nitrosopropylbutylamine         | 7.9   |
| n-nitrosobutylpentylamine         | 14.2  |
| 1-nitroso-2-naphthol              | 7.7   |
| 2-nitroso-1-naphthol              | 1.4   |
| acetaldehyde oxime                | -11.7 |
| propanal oxime                    | -8.1  |
| butanal oxime                     | -4.6  |
| isobutanal oxime                  | -6.5  |
| acetone oxime                     | -10.8 |
| butanone oxime                    | -7.0  |
| cyclopentanone oxime              | -8.7  |
| cyclohexanone oxime               | -4.5  |
| hydrogen sulfide                  | 1.3   |
| ethylthiol                        | 7.1   |
| propylthiol                       | 10.4  |
| butylthiol                        | 13.3  |
| dimethylsulfide                   | 4.9   |
| diethylsulfide                    | 11.1  |
| dipropylsulfide                   | 17.5  |
| diisopropylsulfide                | 15.2  |
| methylethylsulfide                | 7.2   |
| bis(benzoxazolyl-2-methyl)sulfide | 17.0  |
| diethyldisulfide                  | 16.2  |
| methylethyldisulfide              | 12.5  |
| methylpropyldisulfide             | 16.1  |
| diallyldisulfide                  | 18.5  |
| allylmethyldisulfide              | 13.7  |
| dimethyltrisulfide                | 11.4  |
| diethyl malonate                  | 1.4   |
| dibutyl succinate                 | 16.9  |
| dibutyl glutarate                 | 18.4  |
| dimethyl adipate                  | -1.0  |
| diethyl adipate                   | 3.4   |
| 4-(1-adamantyl)phenol             | 15.9  |
| 2-(1-adamantyl)-4-cresol          | 18.7  |
| 2-cyclohexyloxyphenol             | 12.4  |
| 3-cyclohexyloxyphenol             | 7.4   |
| 4-cyclohexyloxyphenol             | 7.0   |
| 2-methoxy-4-vinylphenol           | 5.4   |
| 2-cyclohexylmethyloxyphenol       | 14.7  |
| 3-cyclohexylmethyloxyphenol       | 11.5  |
| 4-cyclohexylmethyloxyphenol       | 11.5  |

|                                     |       |
|-------------------------------------|-------|
| 4-hydroxypropriophenone             | -7.7  |
| 4-hydroxybutyrophenone              | -4.5  |
| 4-hydroxypentanophenone             | -1.1  |
| 2-hydroxybenzophenone               | 17.5  |
| 3-hydroxybenzophenone               | -0.6  |
| 4-hydroxybenzophenone               | -0.5  |
| 4,4'-dihydroxybenzophenone          | -18   |
| triclosan                           | 16.8  |
| serotonin                           | -23.6 |
| totarol                             | 34.7  |
| 5-hydroxyindole                     | -9.0  |
| 6-hydroxyquinoline                  | -5.5  |
| ferruginol                          | 36.6  |
| 8-hydroxyjulolidine                 | 1.2   |
| 4-chlorocatechol                    | -11.3 |
| 3,5-dichlorocatechol                | -7.4  |
| 3,4,5-trichlorocatechol             | -3.5  |
| tetrachlorocatechol                 | -0.2  |
| dibenzo-p-dioxin                    | 26.2  |
| 2,3,7,8-tetrachlorodibenzo-p-dioxin | 38.9  |

Table S7 Experimental free energy of transfer from *n*-hexadecane to water ( $\Delta G_{expt}^{\circ}$ )

### 3.2 Free Energy of Transfer and the Number of Alkyl Hydrogens

Figure S9 explores the relationship between free energy of transfer from *n*-hexadecane to water ( $\Delta G_{calc}^{\circ}$ ) and the number of alkyl hydrogens ( $N_H$ ) for a homologous series of compounds containing a single functional group but a varying alkyl chain length.



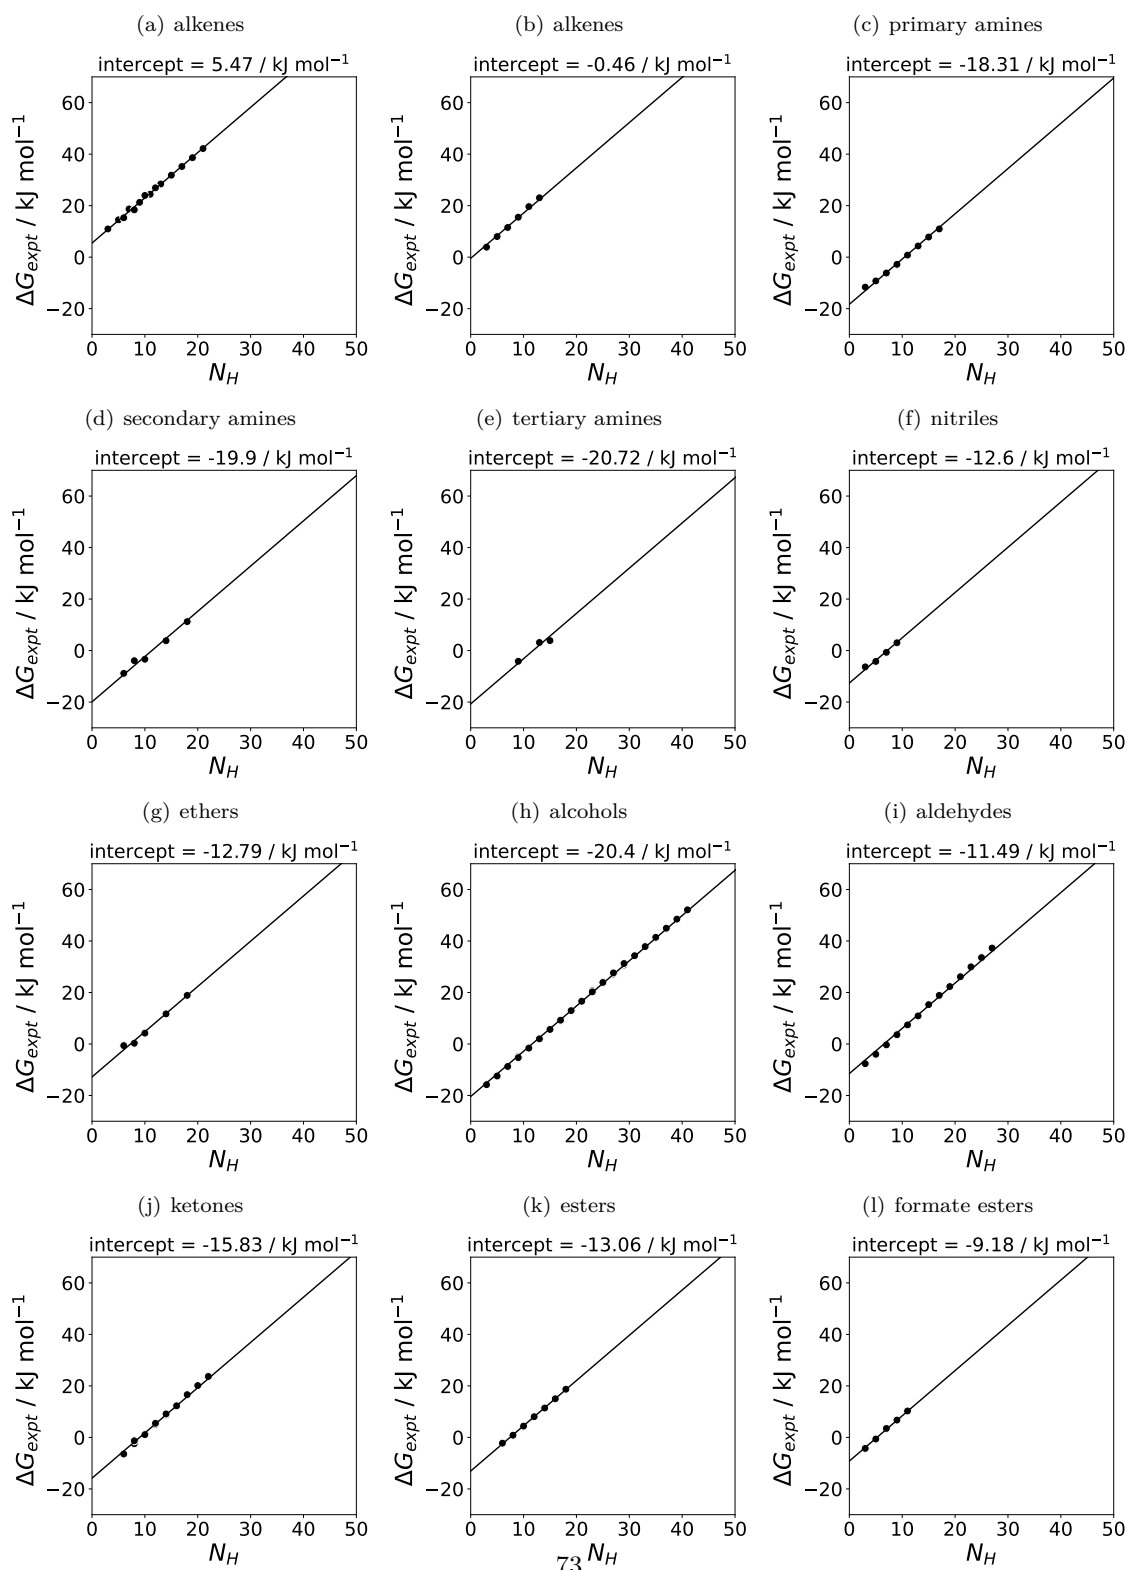

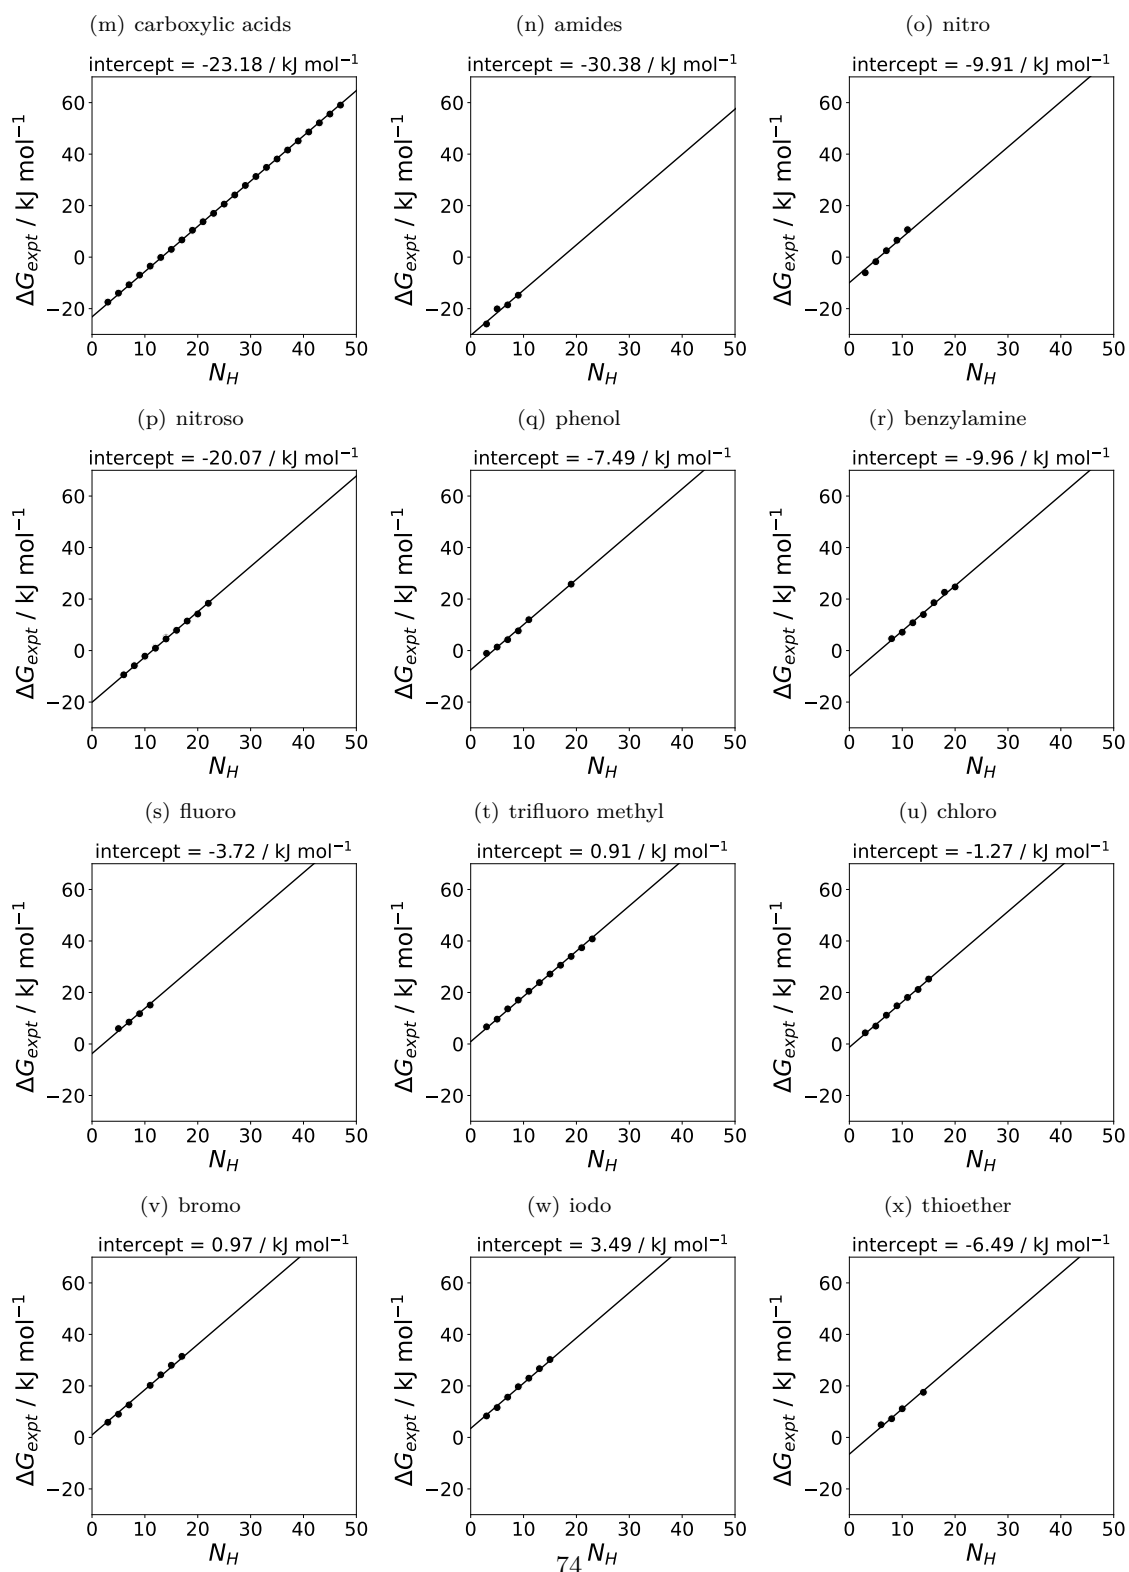

Figure S9  $\Delta G_{expt}^{\circ}$  vs  $N_H$  for a range of homologous series of functional groups. The lines are the lines of best fit keeping the slope constant amongst the different functional groups (slope =  $+1.8 \text{ kJ mol}^{-1}$ )

### 3.3 $f$ value for Various Atom Types

The surface area of the patch of surface associated with each atom is calculated using the local density of points given by Equ. S6.

$$A_{atom} = \sum_p \frac{1}{N_{neigh}} \pi r^2 \quad (S6)$$

where  $p$  is every MEP point in the patch,  $N_{neigh}$  is the number of points are within a radius  $r = 0.1 \text{ \AA}$  of the point  $p$  considered. The algorithm to find  $N_{neigh}$  was the kDtree query ball algorithm implemented with SciPy (27, 28).

The non-polar surface area assigned to an AIP ( $A_{np}$ ) can be obtained from Equ. S7, where  $A_{atom}$  is the surface area of the associated atom on the  $0.002 \text{ e bohr}^{-3}$  electron density isosurface,  $A_{AIP}$  is  $9.35 \text{ \AA}^2$  and  $N_p$  is the number of polar AIPs.(29)

$$A_{np} = A_{atom} - N_p A_{AIP} \quad (S7)$$

## 4 Host-guest complexes AIP pairings

### 4.1 Tables of host-guest interactions

| AIP 1  |       | AIP2 |       | $f$ value | $\Delta\Delta G$ kJ mol <sup>-1</sup> |
|--------|-------|------|-------|-----------|---------------------------------------|
| type   | value | type | value |           |                                       |
| H.N    | 3.7   | N.ar | -6.7  | 1.0       | -13.7                                 |
| H.N    | 3.7   | N.ar | -6.8  | 1.0       | -13.6                                 |
| O.2.am | -7.2  | H.N  | 2.8   | 1.0       | -8.7                                  |
| O.2.am | -6.9  | H.N  | 2.8   | 1.0       | -7.9                                  |

Table S8 AIP contacts for the host-guest complex shown in Figure 16 of the main text and free energy contributions to binding in chloroform solution.

| AIP 1  |       | AIP2 |       | $f$ value | $\Delta\Delta G$ kJ mol <sup>-1</sup> |
|--------|-------|------|-------|-----------|---------------------------------------|
| type   | value | type | value |           |                                       |
| H.N    | 2.8   | C.ar | -1.2  | 0.5       | -0.4                                  |
| H.N    | 2.8   | C.ar | -0.9  | 0.5       | -0.3                                  |
| H.N    | 2.8   | C.ar | -1.3  | 0.5       | -0.5                                  |
| H.N    | 2.8   | C.ar | -1.1  | 0.5       | -0.4                                  |
| O.2.am | -6.4  | H.N  | 2.4   | 1.0       | -5.4                                  |
| O.2.am | -6.3  | H.N  | 2.3   | 1.0       | -4.6                                  |
| O.2.am | -6.6  | H.N  | 2.3   | 1.0       | -4.8                                  |
| O.2.am | -6.6  | H.N  | 2.2   | 1.0       | -4.1                                  |

Table S9 AIP contacts for the host-guest complex shown in Figure 17 of the main text and free energy contributions to binding in chloroform solution.

| AIP 1    |       | AIP2 |       | $f$ value | $\Delta\Delta G$ kJ mol <sup>-1</sup> |
|----------|-------|------|-------|-----------|---------------------------------------|
| type     | value | type | value |           |                                       |
| H.soft   | 1.4   | C.ar | -1.3  | 0.5       | -1.3                                  |
| H.soft   | 1.4   | C.ar | -1.1  | 0.5       | -1.3                                  |
| H.soft   | 1.3   | C.ar | -1.0  | 0.5       | -1.4                                  |
| H.soft   | 1.3   | C.ar | -0.9  | 0.5       | -1.4                                  |
| H.soft   | 1.3   | C.ar | -1.6  | 0.5       | -1.3                                  |
| H.soft   | 1.3   | C.ar | -1.3  | 0.5       | -1.4                                  |
| H.soft   | 1.4   | C.ar | -1.6  | 0.5       | -1.2                                  |
| H.soft   | 1.4   | C.ar | -1.2  | 0.5       | -1.3                                  |
| N.pl3.am | -0.4  | C.ar | -1.6  | 0.5       | -1.6                                  |
| N.pl3.am | 0.5   | C.ar | -1.0  | 0.5       | -1.9                                  |
| N.pl3.am | -0.4  | C.ar | -1.3  | 0.5       | -1.8                                  |
| N.pl3.am | 0.5   | C.ar | -1.6  | 0.5       | -1.7                                  |
| H.N      | 2.8   | C.ar | -1.2  | 0.5       | 0.8                                   |
| H.N      | 2.8   | C.ar | -0.9  | 0.5       | 1.0                                   |
| H.N      | 2.8   | C.ar | -1.3  | 0.5       | 0.8                                   |
| H.N      | 2.8   | C.ar | -1.1  | 0.5       | 0.8                                   |
| O.2.am   | -6.4  | H.N  | 2.4   | 1.0       | 0.8                                   |
| O.2.am   | -6.3  | H.N  | 2.3   | 1.0       | 1.1                                   |
| O.2.am   | -6.6  | H.N  | 2.3   | 1.0       | 1.2                                   |
| O.2.am   | -6.6  | H.N  | 2.2   | 1.0       | 1.4                                   |

Table S10 AIP contacts for the host-guest complex shown in Figure 17 of the main text and free energy contributions to binding in water.

## References

1. G. Beggiato, G. G. Aloisi, U. Mazzucato, *J. Chem. Soc., Faraday Trans. 1* **70**, 628–634 (1974).
2. C. Laurence, J. Graton, M. Berthelot, M. J. El Ghomari, *Chem. A Eur. J.* **17**, 10431–10444 (2011).
3. L. J. Andrews, R. M. Keefer, *J. Org. Chem.* **52**, 2690–2694 (1987).
4. A. M. Lamsabhi, W. Bouab, M. Esseffar, M. Alcamí, M. Yáñez, J.-L. M. Abboud, *New J. Chem.* **25**, 509–517 (3 2001).
5. A. El Firdoussi, M. Esseffar, W. Bouab, A. Lamsabhi, J.-L. M. Abboud, O. Mó, M. Yáñez, *New J. Chem.* **27**, 1741–1747 (12 2003).
6. A. El Firdoussi, M. Esseffar, W. Bouab, J.-L. M. Abboud, O. Mó, M. Yáñez, *J. Phys. Chem. A* **108**, 10568–10577 (2004).
7. H.-P. Slepser, R. Paetzold, *Z. Phys. Chem.* **255**, 1125–1135 (1974).
8. E. Augdahl, P. Klaeboe, *Acta Chem. Scand.* **18**, 18 (1964).
9. J.-M. Dumas, M. Gomel, M. Guerin, in *Halides, Pseudo-Halides and Azides (1983)* (John Wiley & Sons, Ltd, 1983), chap. 21, pp. 985–1020, ISBN: 9780470771723.

10. J. Dumas, C. Geron, A. Kribii, M. Lakraimi, *Canadian journal of chemistry* **62**, 2634–2640 (1984).
11. M. G. Sarwar, B. Dragisic, L. J. Salsberg, C. Gouliaras, M. S. Taylor, *J. Am. Chem. Soc.* **132**, 1646–1653 (2010).
12. C. Laurence, M. Queignec-Cabanetos, B. Wojtkowiak, *J. Chem. Soc., Perkin Trans. 2*, 1605–1610 (12 1982).
13. M. C. Storer, C. A. Hunter, *Chem. Soc. Rev.* **51**, 10064–10082 (2022).
14. M. Berthelot, F. Besseau, C. Laurence, *Eur. J. Org. Chem.* **1998**, 925–931 (1998).
15. J. Graton, C. Laurence, M. Berthelot, J.-Y. Le Questel, F. Besseau, E. D. Raczynska, *J. Chem. Soc., Perkin Trans. 2*, 997–1002 (5 1999).
16. C. Ouvrard, M. Berthelot, C. Laurence, *J. Chem. Soc., Perkin Trans. 2*, 1357–1362 (7 1999).
17. H. Zhong, J. P. Bowen, *J. Am. Chem. Soc.* **129**, 5780–5780 (2007).
18. L. Cordella, P. Foggia, C. Sansone, M. Vento, *IEEE Trans. Pattern Anal. Mach. Intell* **26**, 1367–1372 (2004).
19. A. Hagberg, P. Swart, D. Chult, *Proc. Python Sci. Conf.* (2008).
20. L. Mentel, *Mendeleev - A Python package with properties of chemical elements, ions, isotopes and methods to manipulate and visualize periodic table*. Version 0.14.0, 2021, (<https://github.com/lmentel/mendeleev>).
21. C. B. Barber, D. P. Dobkin, H. Huhdanpaa, *ACM Trans. Math. Softw.* **22**, 469–483 (1996).
22. C. H. J. H. S. Park, *Expert Syst. Appl.* **36**, 3336–3341 (2009).
23. F. Pedregosa, G. Varoquaux, A. Gramfort, V. Michel, B. Thirion, O. Grisel, M. Blondel, P. Prettenhofer, R. Weiss, V. Dubourg, J. Vanderplas, A. Passos, D. Cournapeau, M. Brucher, M. Perrot, E. Duchesnay, *J. Mach. Learn. Res.* **12**, 2825–2830 (2011).
24. D. P. Reynolds, M. C. Storer, C. A. Hunter, *Chem. Sci.* **12**, 13193–13208 (2021).
25. Y. Chung, F. H. Vermeire, H. Wu, P. J. Walker, M. H. Abraham, W. H. Green, *J. Chem. Inf. Model.* **62**, 433–446 (2022).
26. M. H. Abraham, P. L. Grellier, R. A. McGill, *J. Chem. Soc., Perkin Trans. 2*, 797–803 (1987).
27. J. L. Bentley, *Commun. ACM* **18**, 509–517 (1975).
28. P. Virtanen, R. Gommers, T. E. Oliphant, M. Haberland, T. Reddy, D. Cournapeau, E. Burovski, P. Peterson, W. Weckesser, J. Bright, S. J. van der Walt, M. Brett, J. Wilson, K. J. Millman, N. Mayorov, A. R. J. Nelson, E. Jones, R. Kern, E. Larson, C. J. Carey, Í. Polat, Y. Feng, E. W. Moore, J. VanderPlas, D. Laxalde, J. Perktold, R. Cimrman, I. Henriksen, E. A. Quintero, C. R. Harris, A. M. Archibald, A. H. Ribeiro, F. Pedregosa, P. van Mulbregt, SciPy 1.0 Contributors, *Nature Methods* **17**, 261–272 (2020).
29. C. S. Calero, J. Farwer, E. J. Gardiner, C. A. Hunter, M. Mackey, S. Scuderi, S. Thompson, J. G. Vinter, *Phys. Chem. Chem. Phys.* **15**, 18262–18273 (41 2013).
